# Supplementary material
Source: publisher figshare collection journal article supplement (https://acs.figshare.com/ndownloader/files/11020865)
Supplement: Supplementary file 1 [file 11020865]

#=======================================================================
data_I
#=======================================================================

# 5. CHEMICAL DATA

_audit_creation_method 'Jana2006 Version : 19/10/2017'
_chemical_name_systematic
; ?
;
_chemical_name_common                    ?
_chemical_formula_moiety                 'C19 H34 N3 O2 P2 Re, C6 H6'
_chemical_formula_structural             ?
_chemical_formula_analytical             ?
_chemical_formula_iupac                  ?
_chemical_formula_sum                    'C25 H40 N3 O2 P2 Re1'
_chemical_formula_weight                 662.8
_chemical_melting_point                  ?
_chemical_compound_source                ?
_chemical_absolute_configuration         ?

#=======================================================================

# 6. CRYSTAL DATA

_symmetry_cell_setting                   orthorhombic
_symmetry_space_group_name_H-M           'P 21 21 21'
_symmetry_space_group_name_Hall          'P 2xab;2ybc;2zac'
_symmetry_Int_Tables_number              19

loop_
 _space_group_symop_id
 _space_group_symop_operation_xyz
 1   x,y,z
 2   -x+1/2,-y,z+1/2
 3   -x,y+1/2,-z+1/2
 4   x+1/2,-y+1/2,-z

_cell_length_a                           10.1881(7)
_cell_length_b                           13.7426(11)
_cell_length_c                           20.6392(16)
_cell_angle_alpha                        90
_cell_angle_beta                         90
_cell_angle_gamma                        90
_cell_volume                             2889.7(4)

loop_
 _twin_individual_id
 _twin_individual_mass_fraction_refined
 _twin_individual_twin_matrix_11
 _twin_individual_twin_matrix_12
 _twin_individual_twin_matrix_13
 _twin_individual_twin_matrix_21
 _twin_individual_twin_matrix_22
 _twin_individual_twin_matrix_23
 _twin_individual_twin_matrix_31
 _twin_individual_twin_matrix_32
 _twin_individual_twin_matrix_33
1 0.990(15)
1 0 0
0 1 0
0 0 1
2 0.010(15)
-1 0 0
0 -1 0
0 0 -1

_cell_formula_units_Z                    4

_cell_measurement_reflns_used            1967
_cell_measurement_theta_min              2.68
_cell_measurement_theta_max              25.94
_cell_measurement_temperature            100
_cell_special_details
; ?
;

_exptl_crystal_density_diffrn            1.5234
_exptl_crystal_density_meas              ?
_exptl_crystal_density_method            ?
_exptl_crystal_F_000                     1328

_exptl_absorpt_coefficient_mu            4.34
_exptl_crystal_description               needle
_exptl_crystal_size_max                  0.15
_exptl_crystal_size_mid                  0.06
_exptl_crystal_size_min                  0.04
_exptl_crystal_size_rad                  ?
_exptl_crystal_colour                    colourless
_exptl_absorpt_correction_type           multi-scan
_exptl_absorpt_process_details           SADABS
_exptl_absorpt_correction_T_min          0.52
_exptl_absorpt_correction_T_max          0.84
loop_
 _exptl_crystal_face_index_h
 _exptl_crystal_face_index_k
 _exptl_crystal_face_index_l
 _exptl_crystal_face_perp_dist
 ? ? ? ?

#=======================================================================

# 7. EXPERIMENTAL DATA

_exptl_special_details                   ?

_diffrn_ambient_temperature              100
_diffrn_source                           ?
_diffrn_source_power                     ?
_diffrn_source_voltage                   ?
_diffrn_source_current                   ?
_diffrn_radiation_type                   'Mo K\a'
_diffrn_radiation_source                 'X-ray tube'
_diffrn_radiation_wavelength             0.71073
_diffrn_radiation_monochromator          graphite
_diffrn_measurement_device               'four-circle diffractometer'
_diffrn_measurement_device_type          'Bruker KAPPA APEX II CCD'
_diffrn_detector                         ?
_diffrn_detector_area_resol_mean         ?
_diffrn_measurement_method               '\w- and \f-scans'
_diffrn_measurement_specimen_support     ?

_diffrn_reflns_number                    11512
_diffrn_reflns_theta_min                 2.23
_diffrn_reflns_theta_max                 27.3
_diffrn_reflns_theta_full                27.3
_diffrn_measured_fraction_theta_max      0.99
_diffrn_measured_fraction_theta_full     0.99
_diffrn_reflns_av_R_equivalents          0.0558
_diffrn_reflns_av_unetI/netI             0.1079
_diffrn_reflns_limit_h_min               -11
_diffrn_reflns_limit_h_max               13
_diffrn_reflns_limit_k_min               -17
_diffrn_reflns_limit_k_max               17
_diffrn_reflns_limit_l_min               -26
_diffrn_reflns_limit_l_max               22
_diffrn_reflns_reduction_process         ?

_diffrn_standards_number                 ?
_diffrn_standards_interval_count         ?
_diffrn_standards_interval_time          ?
_diffrn_standards_decay_%                ?
loop_
_diffrn_standard_refln_index_h
_diffrn_standard_refln_index_k
_diffrn_standard_refln_index_l
  ? ? ?

_diffrn_radiation_probe                  X-ray

#=======================================================================

# 8. REFINEMENT DATA

_refine_special_details
; ?
;

_reflns_number_total                     6403
_reflns_number_gt                        4528
_reflns_threshold_expression             'I>3\s(I)'

_refine_ls_structure_factor_coef         Fsqd
_refine_ls_R_factor_gt                   0.0484
_refine_ls_wR_factor_gt                  0.0991
_refine_ls_R_factor_all                  0.0764
_refine_ls_wR_factor_ref                 0.1115
_refine_ls_goodness_of_fit_ref           1.11
_refine_ls_goodness_of_fit_gt            1.18
_refine_ls_restrained_S_gt               ?
_refine_ls_restrained_S_all              ?
_refine_ls_number_reflns                 6403
_refine_ls_number_parameters             309
_refine_ls_number_restraints             2
_refine_ls_number_constraints            150
_refine_ls_weighting_scheme              sigma
_refine_ls_weighting_details             'w=1/(\s^2^(I)+0.0004I^2^)'
_refine_ls_hydrogen_treatment            'mixed'
_refine_ls_shift/su_max                  0.0360
_refine_ls_shift/su_mean                 0.0014
_refine_diff_density_max                 2.27
_refine_diff_density_min                 -1.10
_refine_ls_extinction_method             'none'
_refine_ls_extinction_coef               ?
_refine_ls_abs_structure_details
;  2792 of Friedel pairs used in the refinement
;
_refine_ls_abs_structure_Flack            0.010(15)
_refine_ls_abs_structure_Rogers          ?

loop_
 _atom_type_symbol
 _atom_type_scat_dispersion_real
 _atom_type_scat_dispersion_imag
 _atom_type_scat_source
 C    0.0033  0.0016
 'International Tables Vol C tables 4.2.6.8 and 6.1.1.1'
 H    0.0000  0.0000
 'International Tables Vol C tables 4.2.6.8 and 6.1.1.1'
 H    0.0000  0.0000
 'International Tables Vol C tables 4.2.6.8 and 6.1.1.1'
 N    0.0061  0.0033
 'International Tables Vol C tables 4.2.6.8 and 6.1.1.1'
 O    0.0106  0.0060
 'International Tables Vol C tables 4.2.6.8 and 6.1.1.1'
 P    0.1023  0.0942
 'International Tables Vol C tables 4.2.6.8 and 6.1.1.1'
 Re  -1.0185  7.2310
 'International Tables Vol C tables 4.2.6.8 and 6.1.1.1'

_computing_data_collection               'Apex 3 (Bruker, 2016)'
_computing_cell_refinement               'SAINT-Plus (Bruker, 2016)'
_computing_data_reduction                'SAINT-Plus (Bruker, 2016)'
_computing_structure_solution            'SHELXT (Sheldrick, 2015)'
_computing_structure_refinement          'Jana 2006 (Pet\<r\'i\<cek et al., 2014)'
_computing_molecular_graphics            'Mercury (Macrae et al., 2008)'
_computing_publication_material          ?

loop_
 _restr_distance_atom_site_label_1
 _restr_distance_site_symmetry_1
 _restr_distance_atom_site_label_2
 _restr_distance_site_symmetry_2
 _restr_distance_target
 _restr_distance_target_weight_param
N1 . Hn1 . 0.87 0.001
N3 . Hn3 . 0.87 0.001

loop_
 _restr_angle_atom_site_label_1
 _restr_angle_site_symmetry_1
 _restr_angle_atom_site_label_2
 _restr_angle_site_symmetry_2
 _restr_angle_atom_site_label_3
 _restr_angle_site_symmetry_3
 _restr_angle_target
 _restr_angle_target_weight_param
 ? ? ? ? ? ? ? ?

loop_
 _restr_torsion_atom_site_label_1
 _restr_torsion_site_symmetry_1
 _restr_torsion_atom_site_label_2
 _restr_torsion_site_symmetry_2
 _restr_torsion_atom_site_label_3
 _restr_torsion_site_symmetry_3
 _restr_torsion_atom_site_label_4
 _restr_torsion_site_symmetry_4
 _restr_torsion_angle_target
 _restr_torsion_weight_param
 ? ? ? ? ? ? ? ? ? ?

loop_
 _restr_equal_distance_atom_site_label_1
 _restr_equal_distance_site_symmetry_1
 _restr_equal_distance_atom_site_label_2
 _restr_equal_distance_site_symmetry_2
 _restr_equal_distance_class_class_id
 _restr_equal_distance_class_target_weight_param
 ? ? ? ? ? ?

loop_
 _restr_equal_angle_atom_site_label_1
 _restr_equal_angle_site_symmetry_1
 _restr_equal_angle_atom_site_label_2
 _restr_equal_angle_site_symmetry_2
 _restr_equal_angle_atom_site_label_3
 _restr_equal_angle_site_symmetry_3
 _restr_equal_angle_class_class_id
 _restr_equal_angle_class_target_weight_param
 ? ? ? ? ? ? ? ?

loop_
 _restr_equal_torsion_atom_site_label_1
 _restr_equal_torsion_site_symmetry_1
 _restr_equal_torsion_atom_site_label_2
 _restr_equal_torsion_site_symmetry_2
 _restr_equal_torsion_atom_site_label_3
 _restr_equal_torsion_site_symmetry_3
 _restr_equal_torsion_atom_site_label_4
 _restr_equal_torsion_site_symmetry_4
 _restr_equal_torsion_class_class_id
 _restr_equal_torsion_class_target_weight_param
 ? ? ? ? ? ? ? ? ? ?


#=======================================================================

# 9. ATOMIC COORDINATES AND DISPLACEMENT PARAMETERS

loop_
 _atom_site_label
 _atom_site_type_symbol
 _atom_site_fract_x
 _atom_site_fract_y
 _atom_site_fract_z
 _atom_site_adp_type
 _atom_site_U_iso_or_equiv
 _atom_site_site_symmetry_multiplicity
 _atom_site_occupancy
 _atom_site_calc_flag
 _atom_site_refinement_flags
 _atom_site_disorder_assembly
 _atom_site_disorder_group
  Re1 Re 0.37311(4) 0.73410(3) 0.338569(18) Uani 0.01984(9) 4 1 d . . .
  P1 P 0.4754(3) 0.6141(2) 0.27536(14) Uani 0.0255(9) 4 1 d . . .
  P2 P 0.2500(2) 0.8005(2) 0.42360(13) Uani 0.0215(8) 4 1 d . . .
  O1 O 0.3358(7) 0.8873(6) 0.2327(4) Uani 0.036(3) 4 1 d . . .
  O2 O 0.6286(8) 0.8251(5) 0.3892(3) Uani 0.030(2) 4 1 d . . .
  N1 N 0.4996(7) 0.5262(6) 0.3311(5) Uani 0.026(3) 4 1 d . . .
  N2 N 0.3741(9) 0.6130(6) 0.4054(4) Uani 0.023(2) 4 1 d . . .
  N3 N 0.2419(8) 0.7028(7) 0.4746(4) Uani 0.028(3) 4 1 d . . .
  C1 C 0.3048(9) 0.6179(8) 0.4630(5) Uani 0.020(3) 4 1 d . . .
  C2 C 0.3019(11) 0.5400(8) 0.5058(5) Uani 0.031(4) 4 1 d . . .
  C3 C 0.3668(11) 0.4558(7) 0.4894(5) Uani 0.028(3) 4 1 d . . .
  C4 C 0.4344(9) 0.4470(8) 0.4322(5) Uani 0.027(3) 4 1 d . . .
  C5 C 0.4343(10) 0.5274(7) 0.3902(5) Uani 0.023(3) 4 1 d . . .
  C6 C 0.3270(3) 0.8946(2) 0.47617(17) Uani 0.025(3) 4 1 d . . .
  C7 C 0.3732(3) 0.98342(14) 0.43915(11) Uani 0.040(4) 4 1 d . . .
  C8 C 0.2449(3) 0.92458(17) 0.53452(10) Uani 0.034(4) 4 1 d . . .
  C9 C 0.0757(2) 0.8372(4) 0.41444(13) Uani 0.030(4) 4 1 d . . .
  C10 C -0.0042(2) 0.75414(18) 0.38743(11) Uani 0.042(4) 4 1 d . . .
  C11 C 0.0660(2) 0.92647(17) 0.37587(10) Uani 0.048(5) 4 1 d . . .
  C12 C 0.3849(3) 0.5448(2) 0.21005(15) Uani 0.031(3) 4 1 d . . .
  C13 C 0.25821(19) 0.5013(2) 0.23797(11) Uani 0.051(5) 4 1 d . . .
  C14 C 0.3601(3) 0.61076(16) 0.15148(10) Uani 0.046(4) 4 1 d . . .
  C15 C 0.6384(3) 0.6328(2) 0.23801(16) Uani 0.034(3) 4 1 d . . .
  C16 C 0.6413(2) 0.73284(15) 0.20617(15) Uani 0.044(4) 4 1 d . . .
  C17 C 0.7491(2) 0.62575(17) 0.28592(13) Uani 0.039(4) 4 1 d . . .
  C18 C 0.3527(9) 0.8290(8) 0.2743(6) Uani 0.030(4) 4 1 d . . .
  C19 C 0.5365(9) 0.7886(7) 0.3704(5) Uani 0.022(3) 4 1 d . . .
  C20 C 0.0065(12) 0.8785(11) 0.1655(8) Uani 0.058(5) 4 1 d . . .
  C21 C -0.0611(12) 0.8988(11) 0.1058(8) Uani 0.061(6) 4 1 d . . .
  C22 C -0.0970(13) 0.8222(12) 0.0656(7) Uani 0.062(6) 4 1 d . . .
  C23 C -0.0608(11) 0.7285(12) 0.0806(6) Uani 0.052(5) 4 1 d . . .
  C24 C 0.0068(10) 0.7084(9) 0.1371(6) Uani 0.040(4) 4 1 d . . .
  C25 C 0.0426(10) 0.7822(10) 0.1779(6) Uani 0.048(5) 4 1 d . . .
  H1 H 0.223(5) 0.669(3) 0.304(3) Uiso 0.096(16) 4 1 d . . .
  Hn3 H 0.203(5) 0.707(7) 0.5121(12) Uiso 0.0331 4 1 d . . .
  H1c2 H 0.25528 0.54483 0.546076 Uiso 0.0369 4 1 d . . .
  H1c3 H 0.364823 0.401709 0.518865 Uiso 0.0339 4 1 d . . .
  H1c4 H 0.480031 0.388065 0.421341 Uiso 0.0319 4 1 d . . .
  H1c6 H 0.402942 0.861915 0.493034 Uiso 0.0302 4 1 d . . .
  H1c7 H 0.412497 0.963393 0.399048 Uiso 0.0479 4 1 d . . .
  H2c7 H 0.299612 1.025045 0.430338 Uiso 0.0479 4 1 d . . .
  H3c7 H 0.436604 1.018123 0.46462 Uiso 0.0479 4 1 d . . .
  H1c8 H 0.234638 0.869955 0.563063 Uiso 0.0412 4 1 d . . .
  H2c8 H 0.288271 0.976503 0.557127 Uiso 0.0412 4 1 d . . .
  H3c8 H 0.160199 0.946225 0.520166 Uiso 0.0412 4 1 d . . .
  H1c9 H 0.039171 0.851992 0.45617 Uiso 0.0357 4 1 d . . .
  H1c10 H 0.017753 0.69523 0.40995 Uiso 0.051 4 1 d . . .
  H2c10 H -0.095935 0.767765 0.393001 Uiso 0.051 4 1 d . . .
  H3c10 H 0.014713 0.746573 0.342139 Uiso 0.051 4 1 d . . .
  H1c11 H 0.108163 0.978875 0.398528 Uiso 0.0577 4 1 d . . .
  H2c11 H 0.108296 0.916788 0.334807 Uiso 0.0577 4 1 d . . .
  H3c11 H -0.024727 0.942212 0.369027 Uiso 0.0577 4 1 d . . .
  H1c12 H 0.437712 0.491575 0.19501 Uiso 0.0378 4 1 d . . .
  H1c13 H 0.276554 0.471739 0.279137 Uiso 0.0606 4 1 d . . .
  H2c13 H 0.194188 0.551846 0.243484 Uiso 0.0606 4 1 d . . .
  H3c13 H 0.22465 0.452955 0.208735 Uiso 0.0606 4 1 d . . .
  H1c14 H 0.326997 0.672427 0.166019 Uiso 0.0558 4 1 d . . .
  H2c14 H 0.440736 0.620469 0.128334 Uiso 0.0558 4 1 d . . .
  H3c14 H 0.29686 0.580716 0.123369 Uiso 0.0558 4 1 d . . .
  H1c15 H 0.651083 0.581874 0.206776 Uiso 0.0402 4 1 d . . .
  H1c16 H 0.566106 0.740048 0.17858 Uiso 0.0529 4 1 d . . .
  H2c16 H 0.639819 0.78226 0.23904 Uiso 0.0529 4 1 d . . .
  H3c16 H 0.719907 0.739231 0.180855 Uiso 0.0529 4 1 d . . .
  H1c17 H 0.7598 0.559232 0.299104 Uiso 0.0469 4 1 d . . .
  H2c17 H 0.828683 0.648432 0.266156 Uiso 0.0469 4 1 d . . .
  H3c17 H 0.729383 0.665084 0.323109 Uiso 0.0469 4 1 d . . .
  H1c20 H 0.026225 0.929469 0.195804 Uiso 0.0697 4 1 d . . .
  H1c21 H -0.081223 0.964663 0.093853 Uiso 0.0726 4 1 d . . .
  H1c22 H -0.147373 0.834766 0.027144 Uiso 0.0746 4 1 d . . .
  H1c23 H -0.08264 0.676426 0.051503 Uiso 0.062 4 1 d . . .
  H1c24 H 0.028712 0.642347 0.147707 Uiso 0.0486 4 1 d . . .
  H1c25 H 0.093492 0.76749 0.215768 Uiso 0.058 4 1 d . . .
  Hn1 H 0.523(7) 0.4663(17) 0.324(4) Uiso 0.0309 4 1 d . . .

loop_
 _atom_site_aniso_label
 _atom_site_aniso_type_symbol
 _atom_site_aniso_U_11
 _atom_site_aniso_U_22
 _atom_site_aniso_U_33
 _atom_site_aniso_U_12
 _atom_site_aniso_U_13
 _atom_site_aniso_U_23
 Re1 Re 0.01645(14) 0.02706(18) 0.01602(15) 0.00042(17) 0.00103(16) -0.00016(20)
 P1 P 0.0224(14) 0.0391(18) 0.0151(13) 0.0017(12) 0.0012(11) -0.0002(14)
 P2 P 0.0190(13) 0.0282(15) 0.0175(13) 0.0007(11) 0.0043(10) -0.0004(12)
 O1 O 0.026(4) 0.050(5) 0.032(5) -0.008(3) -0.002(3) 0.019(4)
 O2 O 0.026(4) 0.035(4) 0.028(4) -0.005(4) -0.010(4) -0.005(3)
 N1 N 0.021(4) 0.025(5) 0.031(5) 0.003(3) -0.001(4) -0.006(5)
 N2 N 0.010(3) 0.040(5) 0.019(4) 0.001(5) -0.002(4) -0.009(4)
 N3 N 0.027(5) 0.032(5) 0.025(5) 0.002(4) 0.006(4) 0.002(5)
 C1 C 0.010(5) 0.029(6) 0.019(5) -0.002(4) -0.002(4) 0.003(5)
 C2 C 0.044(7) 0.035(7) 0.013(6) -0.004(5) 0.000(5) 0.008(5)
 C3 C 0.028(5) 0.034(6) 0.022(5) -0.005(6) -0.008(6) 0.007(5)
 C4 C 0.029(6) 0.027(6) 0.024(6) 0.005(5) -0.004(5) 0.001(5)
 C5 C 0.028(6) 0.021(6) 0.021(6) 0.002(4) 0.002(4) 0.005(5)
 C6 C 0.015(5) 0.033(6) 0.027(6) -0.003(4) 0.006(5) 0.008(6)
 C7 C 0.053(7) 0.038(6) 0.029(6) -0.009(8) -0.002(7) -0.009(5)
 C8 C 0.051(8) 0.043(7) 0.010(5) 0.000(6) 0.006(5) -0.004(5)
 C9 C 0.012(5) 0.044(7) 0.033(7) 0.006(4) 0.010(4) 0.004(6)
 C10 C 0.017(5) 0.066(9) 0.045(7) 0.004(6) -0.002(4) -0.007(8)
 C11 C 0.056(8) 0.058(9) 0.030(7) 0.029(7) -0.001(6) 0.017(7)
 C12 C 0.029(6) 0.029(6) 0.036(6) 0.008(5) -0.003(6) -0.013(5)
 C13 C 0.026(7) 0.051(8) 0.074(10) 0.007(6) -0.019(7) -0.018(8)
 C14 C 0.042(7) 0.071(8) 0.027(6) 0.017(7) -0.014(6) -0.022(6)
 C15 C 0.033(6) 0.038(6) 0.030(6) -0.001(6) 0.009(6) 0.000(5)
 C16 C 0.026(6) 0.070(7) 0.036(6) 0.007(7) 0.013(5) 0.020(7)
 C17 C 0.033(7) 0.048(8) 0.036(7) -0.018(6) -0.004(6) -0.005(7)
 C18 C 0.009(5) 0.036(6) 0.045(7) -0.009(4) 0.005(5) -0.022(6)
 C19 C 0.020(5) 0.016(6) 0.030(5) 0.006(4) 0.010(4) -0.001(5)
 C20 C 0.044(8) 0.071(10) 0.059(10) -0.002(7) 0.005(8) 0.015(11)
 C21 C 0.042(8) 0.045(9) 0.095(14) 0.003(7) 0.009(8) 0.028(10)
 C22 C 0.051(10) 0.105(13) 0.031(7) 0.023(9) 0.007(7) 0.008(9)
 C23 C 0.038(7) 0.069(10) 0.048(8) 0.013(7) -0.002(6) -0.005(9)
 C24 C 0.031(6) 0.048(9) 0.042(7) 0.013(5) -0.002(5) -0.007(7)
 C25 C 0.027(6) 0.075(10) 0.043(8) -0.006(6) -0.007(5) 0.013(8)

loop_
 _jana_atom_site_ADP_C_label
 _jana_atom_site_ADP_C_type_symbol
 _jana_atom_site_ADP_C_111
 _jana_atom_site_ADP_C_112
 _jana_atom_site_ADP_C_113
 _jana_atom_site_ADP_C_122
 _jana_atom_site_ADP_C_123
 _jana_atom_site_ADP_C_133
 _jana_atom_site_ADP_C_222
 _jana_atom_site_ADP_C_223
 _jana_atom_site_ADP_C_233
 _jana_atom_site_ADP_C_333
 ? ? ? ? ? ? ? ? ? ? ? ?

loop_
 _jana_atom_site_ADP_D_label
 _jana_atom_site_ADP_D_type_symbol
 _jana_atom_site_ADP_D_1111
 _jana_atom_site_ADP_D_1112
 _jana_atom_site_ADP_D_1113
 _jana_atom_site_ADP_D_1122
 _jana_atom_site_ADP_D_1123
 _jana_atom_site_ADP_D_1133
 _jana_atom_site_ADP_D_1222
 _jana_atom_site_ADP_D_1223
 _jana_atom_site_ADP_D_1233
 _jana_atom_site_ADP_D_1333
 _jana_atom_site_ADP_D_2222
 _jana_atom_site_ADP_D_2223
 _jana_atom_site_ADP_D_2233
 _jana_atom_site_ADP_D_2333
 _jana_atom_site_ADP_D_3333
 ? ? ? ? ? ? ? ? ? ? ? ? ? ? ? ? ?

loop_
 _jana_atom_site_ADP_E_label
 _jana_atom_site_ADP_E_type_symbol
 _jana_atom_site_ADP_E_11111
 _jana_atom_site_ADP_E_11112
 _jana_atom_site_ADP_E_11113
 _jana_atom_site_ADP_E_11122
 _jana_atom_site_ADP_E_11123
 _jana_atom_site_ADP_E_11133
 _jana_atom_site_ADP_E_11222
 _jana_atom_site_ADP_E_11223
 _jana_atom_site_ADP_E_11233
 _jana_atom_site_ADP_E_11333
 _jana_atom_site_ADP_E_12222
 _jana_atom_site_ADP_E_12223
 _jana_atom_site_ADP_E_12233
 _jana_atom_site_ADP_E_12333
 _jana_atom_site_ADP_E_13333
 _jana_atom_site_ADP_E_22222
 _jana_atom_site_ADP_E_22223
 _jana_atom_site_ADP_E_22233
 _jana_atom_site_ADP_E_22333
 _jana_atom_site_ADP_E_23333
 _jana_atom_site_ADP_E_33333
 ? ? ? ? ? ? ? ? ? ? ? ? ? ? ? ? ? ? ? ? ? ? ?

loop_
 _jana_atom_site_ADP_F_label
 _jana_atom_site_ADP_F_type_symbol
 _jana_atom_site_ADP_F_111111
 _jana_atom_site_ADP_F_111112
 _jana_atom_site_ADP_F_111113
 _jana_atom_site_ADP_F_111122
 _jana_atom_site_ADP_F_111123
 _jana_atom_site_ADP_F_111133
 _jana_atom_site_ADP_F_111222
 _jana_atom_site_ADP_F_111223
 _jana_atom_site_ADP_F_111233
 _jana_atom_site_ADP_F_111333
 _jana_atom_site_ADP_F_112222
 _jana_atom_site_ADP_F_112223
 _jana_atom_site_ADP_F_112233
 _jana_atom_site_ADP_F_112333
 _jana_atom_site_ADP_F_113333
 _jana_atom_site_ADP_F_122222
 _jana_atom_site_ADP_F_122223
 _jana_atom_site_ADP_F_122233
 _jana_atom_site_ADP_F_122333
 _jana_atom_site_ADP_F_123333
 _jana_atom_site_ADP_F_133333
 _jana_atom_site_ADP_F_222222
 _jana_atom_site_ADP_F_222223
 _jana_atom_site_ADP_F_222233
 _jana_atom_site_ADP_F_222333
 _jana_atom_site_ADP_F_223333
 _jana_atom_site_ADP_F_233333
 _jana_atom_site_ADP_F_333333
 ? ? ? ? ? ? ? ? ? ? ? ? ? ? ? ? ? ? ? ? ? ? ? ? ? ? ? ? ? ?


#=======================================================================

# 10. MOLECULAR GEOMETRY


loop_
 _geom_bond_atom_site_label_1
 _geom_bond_atom_site_label_2
 _geom_bond_site_symmetry_1
 _geom_bond_site_symmetry_2
 _geom_bond_distance
 _geom_bond_publ_flag
  Re1 P1 . . 2.347(3) ?
  Re1 P2 . . 2.342(3) ?
  Re1 N2 . . 2.162(8) ?
  Re1 C18 . . 1.871(11) ?
  Re1 C19 . . 1.940(9) ?
  Re1 H1 . . 1.91(5) ?
  P1 N1 . . 1.687(9) ?
  P1 C12 . . 1.891(4) ?
  P1 C15 . . 1.849(4) ?
  P2 N3 . . 1.709(9) ?
  P2 C6 . . 1.861(4) ?
  P2 C9 . . 1.856(4) ?
  O1 C18 . . 1.188(14) ?
  O2 C19 . . 1.133(12) ?
  N1 C5 . . 1.389(14) ?
  N2 C1 . . 1.385(13) ?
  N2 C5 . . 1.363(13) ?
  N3 C1 . . 1.353(14) ?
  N3 Hn3 . . 0.87(3) ?
  C1 C2 . . 1.387(15) ?
  C2 C3 . . 1.375(15) ?
  C2 H1c2 . . 0.96 ?
  C3 C4 . . 1.372(15) ?
  C3 H1c3 . . 0.96 ?
  C4 C5 . . 1.406(15) ?
  C4 H1c4 . . 0.96 ?
  C6 C7 . . 1.515(4) ?
  C6 C8 . . 1.523(4) ?
  C6 H1c6 . . 0.96 ?
  C7 H1c7 . . 0.96 ?
  C7 H2c7 . . 0.96 ?
  C7 H3c7 . . 0.96 ?
  C8 H1c8 . . 0.96 ?
  C8 H2c8 . . 0.96 ?
  C8 H3c8 . . 0.96 ?
  C9 C10 . . 1.509(5) ?
  C9 C11 . . 1.466(6) ?
  C9 H1c9 . . 0.96 ?
  C10 H1c10 . . 0.96 ?
  C10 H2c10 . . 0.96 ?
  C10 H3c10 . . 0.96 ?
  C11 H1c11 . . 0.96 ?
  C11 H2c11 . . 0.96 ?
  C11 H3c11 . . 0.96 ?
  C12 C13 . . 1.535(4) ?
  C12 C14 . . 1.532(4) ?
  C12 H1c12 . . 0.96 ?
  C13 H1c13 . . 0.96 ?
  C13 H2c13 . . 0.96 ?
  C13 H3c13 . . 0.96 ?
  C14 H1c14 . . 0.96 ?
  C14 H2c14 . . 0.96 ?
  C14 H3c14 . . 0.96 ?
  C15 C16 . . 1.524(4) ?
  C15 C17 . . 1.502(4) ?
  C20 C21 . . 1.44(2) ?
  C20 C25 . . 1.40(2) ?
  C20 H1c20 . . 0.96 ?
  C21 C22 . . 1.39(2) ?
  C21 H1c21 . . 0.96 ?
  C22 C23 . . 1.38(2) ?
  C22 H1c22 . . 0.96 ?
  C23 C24 . . 1.381(17) ?
  C23 H1c23 . . 0.96 ?
  C24 C25 . . 1.368(18) ?
  C24 H1c24 . . 0.96 ?
  C25 H1c25 . . 0.96 ?

loop_
 _geom_angle_atom_site_label_1
 _geom_angle_atom_site_label_2
 _geom_angle_atom_site_label_3
 _geom_angle_site_symmetry_1
 _geom_angle_site_symmetry_2
 _geom_angle_site_symmetry_3
 _geom_angle
 _geom_angle_publ_flag
  P1 Re1 P2 . . . 158.16(10) ?
  P1 Re1 N2 . . . 79.2(2) ?
  P1 Re1 C18 . . . 98.4(3) ?
  P1 Re1 C19 . . . 94.5(3) ?
  P1 Re1 H1 . . . 79.5(15) ?
  P2 Re1 N2 . . . 79.9(2) ?
  P2 Re1 C18 . . . 101.5(3) ?
  P2 Re1 C19 . . . 93.2(3) ?
  P2 Re1 H1 . . . 91.9(15) ?
  N2 Re1 C18 . . . 171.6(4) ?
  N2 Re1 C19 . . . 94.4(4) ?
  N2 Re1 H1 . . . 82.9(15) ?
  C18 Re1 C19 . . . 93.8(4) ?
  C18 Re1 H1 . . . 88.7(15) ?
  C19 Re1 H1 . . . 173.8(15) ?
  Re1 P1 N1 . . . 100.9(3) ?
  Re1 P1 C12 . . . 122.24(16) ?
  Re1 P1 C15 . . . 122.24(18) ?
  N1 P1 C12 . . . 101.4(3) ?
  N1 P1 C15 . . . 104.6(3) ?
  C12 P1 C15 . . . 102.17(19) ?
  Re1 P2 N3 . . . 100.4(3) ?
  Re1 P2 C6 . . . 118.81(16) ?
  Re1 P2 C9 . . . 122.82(16) ?
  N3 P2 C6 . . . 101.9(3) ?
  N3 P2 C9 . . . 103.3(3) ?
  C6 P2 C9 . . . 105.9(2) ?
  P1 N1 C5 . . . 121.3(7) ?
  Re1 N2 C1 . . . 120.6(6) ?
  Re1 N2 C5 . . . 121.3(6) ?
  C1 N2 C5 . . . 118.0(8) ?
  P2 N3 C1 . . . 123.1(7) ?
  P2 N3 Hn3 . . . 121(7) ?
  C1 N3 Hn3 . . . 115(6) ?
  N2 C1 N3 . . . 115.8(9) ?
  N2 C1 C2 . . . 121.3(9) ?
  N3 C1 C2 . . . 122.9(9) ?
  C1 C2 C3 . . . 118.9(10) ?
  C1 C2 H1c2 . . . 120.56 ?
  C3 C2 H1c2 . . . 120.56 ?
  C2 C3 C4 . . . 121.8(10) ?
  C2 C3 H1c3 . . . 119.1 ?
  C4 C3 H1c3 . . . 119.1 ?
  C3 C4 C5 . . . 117.5(10) ?
  C3 C4 H1c4 . . . 121.26 ?
  C5 C4 H1c4 . . . 121.26 ?
  N1 C5 N2 . . . 115.4(9) ?
  N1 C5 C4 . . . 122.2(9) ?
  N2 C5 C4 . . . 122.5(9) ?
  P2 C6 C7 . . . 113.4(2) ?
  P2 C6 C8 . . . 114.7(2) ?
  P2 C6 H1c6 . . . 103.1 ?
  C7 C6 C8 . . . 110.5(2) ?
  C7 C6 H1c6 . . . 108 ?
  C8 C6 H1c6 . . . 106.41 ?
  C6 C7 H1c7 . . . 109.47 ?
  C6 C7 H2c7 . . . 109.47 ?
  C6 C7 H3c7 . . . 109.47 ?
  H1c7 C7 H2c7 . . . 109.47 ?
  H1c7 C7 H3c7 . . . 109.47 ?
  H2c7 C7 H3c7 . . . 109.47 ?
  C6 C8 H1c8 . . . 109.47 ?
  C6 C8 H2c8 . . . 109.47 ?
  C6 C8 H3c8 . . . 109.47 ?
  H1c8 C8 H2c8 . . . 109.47 ?
  H1c8 C8 H3c8 . . . 109.47 ?
  H2c8 C8 H3c8 . . . 109.47 ?
  P2 C9 C10 . . . 110.4(3) ?
  P2 C9 C11 . . . 110.3(2) ?
  P2 C9 H1c9 . . . 109.69 ?
  C10 C9 C11 . . . 113.3(2) ?
  C10 C9 H1c9 . . . 106.41 ?
  C11 C9 H1c9 . . . 106.5 ?
  C9 C10 H1c10 . . . 109.47 ?
  C9 C10 H2c10 . . . 109.47 ?
  C9 C10 H3c10 . . . 109.47 ?
  H1c10 C10 H2c10 . . . 109.47 ?
  H1c10 C10 H3c10 . . . 109.47 ?
  H2c10 C10 H3c10 . . . 109.47 ?
  C9 C11 H1c11 . . . 109.47 ?
  C9 C11 H2c11 . . . 109.47 ?
  C9 C11 H3c11 . . . 109.47 ?
  H1c11 C11 H2c11 . . . 109.47 ?
  H1c11 C11 H3c11 . . . 109.47 ?
  H2c11 C11 H3c11 . . . 109.47 ?
  P1 C12 C13 . . . 109.8(2) ?
  P1 C12 C14 . . . 110.2(2) ?
  P1 C12 H1c12 . . . 109.95 ?
  C13 C12 C14 . . . 112.8(2) ?
  C13 C12 H1c12 . . . 107.17 ?
  C14 C12 H1c12 . . . 106.76 ?
  C12 C13 H1c13 . . . 109.47 ?
  C12 C13 H2c13 . . . 109.47 ?
  C12 C13 H3c13 . . . 109.47 ?
  H1c13 C13 H2c13 . . . 109.47 ?
  H1c13 C13 H3c13 . . . 109.47 ?
  H2c13 C13 H3c13 . . . 109.47 ?
  C12 C14 H1c14 . . . 109.47 ?
  C12 C14 H2c14 . . . 109.47 ?
  C12 C14 H3c14 . . . 109.47 ?
  H1c14 C14 H2c14 . . . 109.47 ?
  H1c14 C14 H3c14 . . . 109.47 ?
  H2c14 C14 H3c14 . . . 109.47 ?
  P1 C15 C16 . . . 108.8(2) ?
  P1 C15 C17 . . . 113.0(2) ?
  C16 C15 C17 . . . 109.1(2) ?
  Re1 C18 O1 . . . 177.5(9) ?
  Re1 C19 O2 . . . 176.3(8) ?
  C21 C20 C25 . . . 117.8(13) ?
  C21 C20 H1c20 . . . 121.12 ?
  C25 C20 H1c20 . . . 121.12 ?
  C20 C21 C22 . . . 119.4(14) ?
  C20 C21 H1c21 . . . 120.3 ?
  C22 C21 H1c21 . . . 120.3 ?
  C21 C22 C23 . . . 120.3(13) ?
  C21 C22 H1c22 . . . 119.87 ?
  C23 C22 H1c22 . . . 119.87 ?
  C22 C23 C24 . . . 120.7(13) ?
  C22 C23 H1c23 . . . 119.63 ?
  C24 C23 H1c23 . . . 119.63 ?
  C23 C24 C25 . . . 120.3(13) ?
  C23 C24 H1c24 . . . 119.86 ?
  C25 C24 H1c24 . . . 119.86 ?
  C20 C25 C24 . . . 121.3(12) ?
  C20 C25 H1c25 . . . 119.34 ?
  C24 C25 H1c25 . . . 119.34 ?

loop_
 _geom_torsion_atom_site_label_1
 _geom_torsion_atom_site_label_2
 _geom_torsion_atom_site_label_3
 _geom_torsion_atom_site_label_4
 _geom_torsion_site_symmetry_1
 _geom_torsion_site_symmetry_2
 _geom_torsion_site_symmetry_3
 _geom_torsion_site_symmetry_4
 _geom_torsion
 _geom_torsion_publ_flag
 ? ? ? ? ? ? ? ? ? ?

loop_
 _geom_hbond_atom_site_label_D
 _geom_hbond_atom_site_label_H
 _geom_hbond_atom_site_label_A
 _geom_hbond_site_symmetry_D
 _geom_hbond_site_symmetry_H
 _geom_hbond_site_symmetry_A
 _geom_hbond_distance_DH
 _geom_hbond_distance_HA
 _geom_hbond_distance_DA
 _geom_hbond_angle_DHA
 _geom_hbond_publ_flag
  N3 Hn3 O2 . . 4_466   0.87(3)   2.22(4)   3.062(11)   163(9) ?
  C13 H2c13 H1 . . .   0.96   2.06   2.70(5)   122.62 ?


#=======================================================================

# 11. STRUCTURE-FACTOR LIST

loop_
 _refln_index_h
 _refln_index_k
 _refln_index_l
 _refln_F_squared_calc
 _refln_F_squared_meas
 _refln_F_squared_sigma
 _refln_observed_status
   0   0   4  22238.70  20908.90   1250.45 o
   0   0   6  19258.50  18323.20   1135.57 o
   0   0   8   1483.62   1526.63    260.10 o
   0   0  10  18744.10  17253.10   1126.71 o
   0   0  12  39514.50  39871.60   2420.92 o
   0   0  14    448.38    359.57    249.16 <
   0   0  16  30366.30  31153.60   1987.25 o
   0   0  18  20607.00  21043.90   1457.47 o
   0   0  20   1629.29   1904.61    446.40 o
   0   0  22  12906.00  14053.80   1142.54 o
   0   0  24   4708.29   7023.24    836.03 o
   0   0  26   2767.90   3763.81    660.08 o
   0   1   2   2240.69   2391.80    155.25 o
   0   1   3  46488.00  49945.60   1397.86 o
   0   1   4   1369.78   1411.27    109.08 o
   0   1   5   1368.65   2017.51    176.18 o
   0   1   6   2921.57   4572.53    362.07 o
   0   1   7  19517.40  18081.50    811.39 o
   0   1   8    163.60    346.07    139.80 <
   0   1   9  21318.60  21660.00    960.08 o
   0   1  10     93.71    -56.45    174.26 <
   0   1  11    897.52    920.40    175.46 o
   0   1  12      2.90    321.52    152.05 <
   0   1  13  22241.60  22519.00   1028.00 o
   0   1  14   2637.49   2912.13    299.98 o
   0   1  15  30387.90  31892.30   1420.85 o
   0   1  16   2237.77   2120.59    282.49 o
   0   1  17    295.37    665.14    213.28 o
   0   1  18    250.09    262.62    202.48 <
   0   1  19  11640.90  12307.50    700.12 o
   0   1  20    188.53   1406.37    273.71 o
   0   1  21  14913.10  17221.20    904.36 o
   0   1  22    163.09    208.62    227.02 <
   0   1  23    164.43    407.43    250.26 <
   0   1  24      4.00    714.23    262.27 <
   0   1  25   9616.38  10545.30    730.40 o
   0   1  26     90.27     90.81    238.08 <
   0   2   0  80607.10  80277.00   2285.68 o
   0   2   1   5660.69   5399.66    197.07 o
   0   2   2  15041.10  14596.30    526.12 o
   0   2   3  13633.80  13531.10    610.53 o
   0   2   4  62688.00  61509.50   2523.47 o
   0   2   5   1228.83   1385.50    107.48 o
   0   2   6  41315.30  41250.90   1399.51 o
   0   2   7   4757.39   4886.69    252.14 o
   0   2   8   7182.13   6825.66    317.48 o
   0   2   9   2125.15   2332.90    190.79 o
   0   2  10  21799.80  23932.80    847.27 o
   0   2  11    123.46    273.66    157.02 <
   0   2  12  33170.60  32163.60   1153.79 o
   0   2  13     19.43     -2.45    158.31 <
   0   2  14     26.62     63.81    157.08 <
   0   2  15   1212.14   1365.87    236.62 o
   0   2  16  19525.30  18520.80    920.99 o
   0   2  17   7097.06   7608.61    534.39 o
   0   2  18   6887.49   7388.94    533.25 o
   0   2  19    140.77    116.58    201.26 <
   0   2  20     49.55    440.56    229.34 <
   0   2  21      6.90    184.08    220.87 <
   0   2  22  12570.40  13574.00    782.11 o
   0   2  23     45.73    503.15    242.81 <
   0   2  24   5741.60   6126.16    556.04 o
   0   2  25      2.21    542.42    261.19 <
   0   2  26   1200.90   2061.69    365.82 o
   0   3   1  12670.90  11620.30    449.32 o
   0   3   2     70.55    228.26    114.06 <
   0   3   3  65516.00  65119.90   2181.43 o
   0   3   4  10469.90  10013.90    509.27 o
   0   3   5    480.45    404.97    162.04 <
   0   3   6   7165.98   7368.08    424.91 o
   0   3   7  30428.20  30116.60   1315.01 o
   0   3   8   3912.60   3340.42    219.68 o
   0   3   9  45192.20  42279.30   1485.61 o
   0   3  10     46.56    207.40    125.12 <
   0   3  11   2570.10   2631.11    215.79 o
   0   3  12   1183.01   1097.11    164.60 o
   0   3  13  27536.20  25399.30   1167.60 o
   0   3  14   2627.91   3021.35    313.20 o
   0   3  15  13736.10  15582.90    780.93 o
   0   3  16   2263.40   2305.90    287.07 o
   0   3  17      2.24     -6.14    180.40 <
   0   3  18   1402.00   1618.67    291.77 o
   0   3  19  12175.20  12097.70    697.41 o
   0   3  20   1706.19   2216.31    331.73 o
   0   3  21   8798.09   9671.52    654.45 o
   0   3  22      5.15    371.84    236.75 <
   0   3  23   2486.59   2504.71    380.40 o
   0   3  24     13.17    142.35    240.52 <
   0   3  25  10582.00  11427.60    768.64 o
   0   3  26    276.85    300.66    268.75 <
   0   4   0  38285.70  36961.90   1268.33 o
   0   4   1    615.00   1055.39    103.28 o
   0   4   2   2194.38   1758.57    169.44 o
   0   4   3    355.87    330.11    135.01 <
   0   4   4  39270.60  38078.60   1623.76 o
   0   4   5  11548.80  11281.60    580.63 o
   0   4   6  61162.50  61343.80   2555.09 o
   0   4   7   8879.69  10053.20    555.41 o
   0   4   8   7694.97   6752.03    461.61 o
   0   4   9   5620.30   6007.12    439.18 o
   0   4  10  14086.20  13243.90    705.05 o
   0   4  11   3316.94   3522.05    281.58 o
   0   4  12  30133.30  30693.40   1335.46 o
   0   4  13   2049.53   1958.60    251.77 o
   0   4  14     37.63    220.90    172.99 <
   0   4  15    354.90    715.46    219.41 o
   0   4  16   4512.55   4141.78    377.87 o
   0   4  17   1477.02   1600.26    263.65 o
   0   4  18   9237.28   8687.31    585.15 o
   0   4  19    261.07    641.82    246.45 <
   0   4  20    771.06    811.18    271.18 <
   0   4  21   2909.51   3794.49    418.96 o
   0   4  22  15138.00  15716.70    875.94 o
   0   4  23    390.65    679.87    278.41 <
   0   4  24   6638.64   7452.75    598.73 o
   0   4  25    507.44    665.14    287.07 <
   0   5   1  10811.10  10486.40    336.53 o
   0   5   2    125.26    240.53    134.95 <
   0   5   3  38482.50  37645.40   1321.97 o
   0   5   4  16319.30  15994.00    631.77 o
   0   5   5   1439.03   1034.53    204.33 o
   0   5   6   3275.46   2615.15    277.92 o
   0   5   7  41906.70  41520.90   1797.77 o
   0   5   8  44239.20  44467.40   1920.38 o
   0   5   9  38567.00  39937.80   1740.48 o
   0   5  10   5947.23   6712.76    698.84 o
   0   5  11    561.73    106.77    304.45 <
   0   5  12    508.00    792.77    387.66 <
   0   5  13  11359.10  10497.40    937.77 o
   0   5  14   2895.42   3094.99    553.17 o
   0   5  15  15384.50  14591.30    758.88 o
   0   5  16   1338.13    959.67    402.79 <
   0   5  17    239.33    289.62    211.06 <
   0   5  18   1822.16   1504.54    274.16 o
   0   5  19  10344.60  10475.30    673.19 o
   0   5  20   5358.82   5340.75    482.34 o
   0   5  21   4798.54   5970.30    531.79 o
   0   5  22     57.48    175.49    241.74 <
   0   5  23    887.85    562.05    282.46 <
   0   5  24   1201.22   1468.95    566.79 <
   0   5  25   7254.52   7762.01   1043.36 o
   0   6   0  36330.30  33638.60   1196.55 o
   0   6   1   3281.94   3079.03    175.24 o
   0   6   2   7931.89   7249.04    309.99 o
   0   6   3    285.24    427.06    158.22 <
   0   6   4  10428.90   8058.99    491.35 o
   0   6   5  25980.10  27194.60   1215.17 o
   0   6   6  38294.30  35776.40   1588.81 o
   0   6   7  13613.70  12978.80    696.58 o
   0   6   8    548.76    392.70    342.44 <
   0   6   9   2795.69   2147.59    441.49 o
   0   6  10  11573.20  10448.30    923.92 o
   0   6  11   5426.64   5127.22    666.99 o
   0   6  12  10385.50  12144.30   1050.24 o
   0   6  13   5982.40   5794.81    734.26 o
   0   6  14    203.36    289.62    352.19 <
   0   6  15    277.95    493.33    404.92 <
   0   6  16  13558.70  13511.40   1167.21 o
   0   6  17   7318.55   8293.38    953.82 o
   0   6  18   6743.20   4190.87    700.73 o
   0   6  19     22.08    414.79    396.31 <
   0   6  20     74.34   -126.40    428.28 <
   0   6  21   2958.57   3317.11    729.76 o
   0   6  22   5450.16   5629.14    867.32 o
   0   6  23   4034.10   3907.39    756.13 o
   0   6  24   3027.60   2869.18    721.76 o
   0   6  25    265.16    327.66    485.96 <
   0   7   1   2567.43   2747.69    175.98 o
   0   7   2   4879.58   4614.25    262.66 o
   0   7   3  13867.50  12253.50    547.66 o
   0   7   4   7323.83   6592.49    439.92 o
   0   7   5   7904.09   8046.72    508.69 o
   0   7   6     10.48   -177.94    186.50 <
   0   7   7   7421.04   7035.51    743.44 o
   0   7   8  20889.10  21140.90   1492.55 o
   0   7   9  13095.30  13289.30   1076.84 o
   0   7  10   4537.88   5009.41    645.79 o
   0   7  11    301.91    262.62    380.44 <
   0   7  12    515.31   -123.95    344.89 <
   0   7  13   7406.93   6842.84    822.28 o
   0   7  14   9548.87   8439.42    934.23 o
   0   7  15   9198.00   8547.41    983.30 o
   0   7  16   4012.44   3265.57    630.66 o
   0   7  17    219.46   -499.47    358.20 <
   0   7  18   2033.20   2082.55    559.55 o
   0   7  19   6624.25   6785.16    915.17 o
   0   7  20   3884.40   4071.83    765.51 o
   0   7  21   3550.05   3147.76    741.70 o
   0   7  22     14.07    368.16    505.56 <
   0   7  23     29.42    941.26    524.94 <
   0   7  24   1776.35   1460.36    584.37 <
   0   8   0  21833.70  20586.20    791.82 o
   0   8   1  11382.10  10426.20    375.52 o
   0   8   2  16825.40  16248.10    578.72 o
   0   8   3    405.69    458.97    192.64 <
   0   8   4   1839.64   1720.53    260.38 o
   0   8   5   7927.65   7015.87    689.81 o
   0   8   6  12143.50  11130.70    938.43 o
   0   8   7   9276.07   8748.67    847.02 o
   0   8   8    106.23    116.58    362.02 <
   0   8   9   1690.57   1314.33    424.95 o
   0   8  10   9591.10  10002.90    941.34 o
   0   8  11   9332.47   8459.05    915.26 o
   0   8  12   7522.09   6747.12    823.98 o
   0   8  13   2590.96   2202.81    571.07 o
   0   8  14    402.87    403.75    433.20 <
   0   8  15   4077.90   5748.18    803.39 o
   0   8  16  11284.20  10675.40   1137.94 o
   0   8  17   9255.05   7802.51    939.77 o
   0   8  18   8425.70   9121.74   1084.55 o
   0   8  19    688.40    924.08    510.41 <
   0   8  20    267.02    348.52    484.73 <
   0   8  21   2176.33   1957.38    699.67 <
   0   8  22   1660.51    753.50    576.00 <
   0   8  23   1924.04   3486.46    764.15 o
   0   9   1   1397.78   1186.70    155.08 o
   0   9   2  17670.10  16999.10    690.48 o
   0   9   3  14310.80  14025.60    746.35 o
   0   9   4  17639.20  16221.10   1187.12 o
   0   9   5   1526.51   1375.69    394.08 o
   0   9   6     80.22    325.21    371.80 <
   0   9   7   7528.63   7412.26    815.14 o
   0   9   8   5078.98   4787.29    685.33 o
   0   9   9   7963.06   6618.26    795.96 o
   0   9  10   1555.63   1754.89    505.43 o
   0   9  11    254.01    203.71    413.57 <
   0   9  12   1554.39   1386.73    499.60 <
   0   9  13   2282.88   2150.05    562.19 o
   0   9  14  15182.10  14264.90   1271.73 o
   0   9  15   5800.98   4728.38    779.91 o
   0   9  16   6717.57   5292.89    801.64 o
   0   9  17    342.87    132.54    444.27 <
   0   9  18   3429.72   2094.82    599.16 o
   0   9  19   7265.70   4076.74    758.06 o
   0   9  20   5183.26   4114.78    777.23 o
   0   9  21    869.03   1396.55    594.90 <
   0   9  22    713.87    355.89    585.45 <
   0  10   0   1393.91   1548.72    282.04 o
   0  10   1  25225.10  23137.50    779.30 o
   0  10   2   1620.22   1407.59    216.37 o
   0  10   3    203.92    238.08    227.02 <
   0  10   4   1964.15   1482.45    420.20 o
   0  10   5  11452.50  10252.00    922.87 o
   0  10   6  10778.50  11637.50   1003.71 o
   0  10   7   3261.81   3567.46    594.72 o
   0  10   8    275.31   -350.98    391.41 <
   0  10   9    675.56    904.44    453.95 <
   0  10  10   1393.89   1623.58    528.74 o
   0  10  11   9018.14   9829.83   1041.13 o
   0  10  12   3081.44   2623.74    646.03 o
   0  10  13   2702.11   2337.81    601.72 o
   0  10  14    110.09   -845.54    423.07 <
   0  10  15   3156.06   2939.13    687.48 o
   0  10  16   1249.58    981.76    547.47 <
   0  10  17  10830.70  13635.40   1295.97 o
   0  10  18   3571.99   3298.70    715.80 o
   0  10  19   1731.17    753.50    536.81 <
   0  10  20    917.06   1416.18    619.47 <
   0  10  21   1524.88    492.11    602.93 <
   0  10  22   1967.97   3081.49    818.78 o
   0  11   1     29.89   -100.63    191.43 <
   0  11   2  15575.80  14850.30    757.36 o
   0  11   3   5702.87   5964.17    492.50 o
   0  11   4   7942.85   8564.59    606.41 o
   0  11   5    329.02    403.75    393.91 <
   0  11   6    344.83   1062.75    461.08 <
   0  11   7   5324.31   4588.48    687.38 o
   0  11   8  11497.50  12183.60   1114.79 o
   0  11   9   2822.63   3231.20    653.58 o
   0  11  10   6215.35   6247.65    838.11 o
   0  11  11     61.40    -92.04    468.79 <
   0  11  12   1611.36   1450.54    584.26 <
   0  11  13    527.56   -192.67    468.81 <
   0  11  14  10904.00  10961.30   1202.51 o
   0  11  15   1965.37   1575.72    599.17 <
   0  11  16   2014.36   2211.41    662.52 o
   0  11  17     12.56    -54.00    520.33 <
   0  11  18   1371.36    740.00    534.13 <
   0  11  19   1688.57    735.09    576.02 <
   0  11  20   6476.24   4815.51    867.92 o
   0  12   0    170.02    332.57    315.35 <
   0  12   1   9041.93   8321.61    532.02 o
   0  12   2    561.72    609.92    236.82 <
   0  12   3    435.76    670.05    408.57 <
   0  12   4   1800.66   1340.10    445.88 o
   0  12   5   8015.61   7899.45    849.51 o
   0  12   6   1917.75   1974.56    547.28 o
   0  12   7   6006.19   5868.45    785.68 o
   0  12   8     70.51   -223.35    414.77 <
   0  12   9    354.56    619.73    506.76 <
   0  12  10   1105.30   1244.38    571.79 <
   0  12  11  10643.50  10109.60   1120.51 o
   0  12  12    676.89    377.98    536.35 <
   0  12  13   2779.58   1911.97    629.13 o
   0  12  14    693.44    411.11    551.08 <
   0  12  15   1734.91   1098.34    584.53 <
   0  12  16    454.85    700.73    571.80 <
   0  12  17   3727.26   3093.76    792.25 o
   0  12  18    646.75    822.22    574.27 <
   0  12  19    459.57    841.86    614.71 <
   0  13   1    490.37    573.10    246.62 <
   0  13   2   7152.28   7949.77    544.34 o
   0  13   3   1767.28   1089.75    437.42 <
   0  13   4   5004.39   4285.37    651.75 o
   0  13   5    184.30    230.71    441.78 <
   0  13   6    864.26    508.06    454.19 <
   0  13   7    304.61    541.19    481.00 <
   0  13   8  12534.30  14698.10   1272.41 o
   0  13   9    474.24    620.96    509.24 <
   0  13  10   7106.58   6007.12    867.33 o
   0  13  11     24.92    105.54    527.69 <
   0  13  12    975.48   -434.43    472.50 <
   0  13  13    323.33    -42.95    526.48 <
   0  13  14   5182.75   4976.28    843.41 o
   0  13  15    735.12   1121.66    620.80 <
   0  13  16    294.03   -258.94    522.76 <
   0  13  17     93.04   -597.64    534.93 <
   0  13  18   1726.58   1482.45    656.70 <
   0  14   0   1856.06   2820.09    512.94 o
   0  14   1   6154.79   7901.91    563.40 o
   0  14   2    178.52    593.96    418.35 <
   0  14   3    945.00   1099.57    452.74 <
   0  14   4      3.08   -188.99    404.96 <
   0  14   5   8631.55  10047.00   1040.88 o
   0  14   6    141.02   -446.70    431.88 <
   0  14   7   5196.26   6408.41    846.93 o
   0  14   8      3.37    -54.00    444.24 <
   0  14   9     68.17    404.97    495.73 <
   0  14  10     37.32    -96.95    487.19 <
   0  14  11   9810.28   9046.88   1066.98 o
   0  14  12    240.99    136.22    497.02 <
   0  14  13   2450.73   2707.19    680.83 o
   0  14  14      3.85   -494.56    512.88 <
   0  14  15   1550.87   1659.17    706.80 <
   0  14  16    702.61    928.99    614.74 <
   0  15   1      1.06     -3.68    251.57 <
   0  15   2   8476.08   9165.92    895.24 o
   0  15   3     51.01     -9.82    400.07 <
   0  15   4   4045.75   4609.34    691.18 o
   0  15   5     62.40    -60.13    409.88 <
   0  15   6    719.64    774.36    489.63 <
   0  15   7     17.41    174.26    463.87 <
   0  15   8   4457.52   5214.35    812.40 o
   0  15   9     86.15   -263.85    471.21 <
   0  15  10   4219.80   4572.53    788.55 o
   0  15  11      2.81     92.04    498.24 <
   0  15  12   1416.41   2104.64    656.03 o
   0  15  13     12.98    186.53    536.27 <
   0  15  14   4833.96   5236.44    917.34 o
   0  16   1   5211.88   5694.18    725.52 o
   0  16   2     12.81     71.18    386.56 <
   0  16   3     80.10   -168.13    401.28 <
   0  16   4    131.53    165.67    403.74 <
   0  16   5   4444.99   3979.79    706.36 o
   0  16   6    236.66    175.49    449.16 <
   0  16   7   2350.83   2705.96    647.58 o
   0  16   8     41.43     25.77    449.15 <
   0  16   9     20.93    -69.95    439.33 <
   0  16  10      7.50   -298.21    467.53 <
   0  16  11   5736.86   6286.92    945.22 o
   0  17   3     70.50    326.43    441.75 <
   0  17   4   2070.30   2368.49    589.97 o
   0  17   5     60.15    565.74    482.18 <
   0  17   6     21.40    758.41    461.21 <
   0  17   7    158.26    708.09    483.36 <
   1   0   2  73014.60  78217.70   2177.94 o
   1   0   3   9120.86   8903.30    328.02 o
   1   0   4    251.20    427.06    117.66 o
   1   0   5   7241.07   8047.94    393.38 o
   1   0   7  12665.60  12091.60    573.93 o
   1   0   8  19432.90  19867.10    879.76 o
   1   0   9   4875.91   5485.56    338.63 o
   1   0  10  23302.00  21477.10    979.29 o
   1   0  11  15023.10  15330.10    733.39 o
   1   0  12   2720.00   2882.68    279.36 o
   1   0  13   4007.16   4883.01    385.02 o
   1   0  14  23008.50  22701.90   1054.70 o
   1   0  15   6572.97   7465.03    494.81 o
   1   0  16    469.97    551.01    201.20 <
   1   0  17  20726.20  20299.00    995.14 o
   1   0  18   1275.96   1286.10    277.33 o
   1   0  19   4669.78   5402.11    475.26 o
   1   0  20   7824.61   8748.67    604.03 o
   1   0  21   2642.83   3792.03    417.20 o
   1   0  22   1826.57   2034.69    350.67 o
   1   0  23   3387.04   5030.27    494.28 o
   1   0  24   4145.91   4867.06    498.92 o
   1   0  25      7.05    119.04    233.16 <
   1   0  26   3315.06   5334.62    550.15 o
   1   1   0   2273.68   2054.32     95.80 o
   1   1   1  43643.60  42950.60   1427.92 o
   1   1  -1  40806.30  43204.60   1404.37 o
   1   1   2  63769.40  64311.20   3881.69 o
   1   1  -2  65434.80  69901.00   2719.11 o
   1   1   3   4862.65   4858.46    206.20 o
   1   1  -3   4519.14   4503.81    203.80 o
   1   1   4  23641.20  24347.50    831.50 o
   1   1  -4  24446.50  24282.50    834.54 o
   1   1   5  19361.60  21860.00    735.93 o
   1   1  -5  19143.00  21343.40    732.26 o
   1   1   6   3883.02   4757.83    239.91 o
   1   1  -6   3382.15   3713.49    407.88 o
   1   1   7  19714.70  20354.30    722.99 o
   1   1  -7  19963.60  19683.00    880.35 o
   1   1   8  24314.30  22673.70    868.36 o
   1   1  -8  27148.10  25972.40   1057.10 o
   1   1   9   2738.43   2590.61    362.31 o
   1   1  -9   2085.42   2361.12    350.50 o
   1   1  10   8538.87   7532.52    418.64 o
   1   1 -10   7244.54   6299.19    400.57 o
   1   1  11  29951.50  29553.30   1293.45 o
   1   1 -11  29797.00  29291.90   1289.18 o
   1   1  12   4775.27   5232.76    393.58 o
   1   1 -12   4646.98   5291.67    389.24 o
   1   1  13  11107.80  11138.00    572.94 o
   1   1 -13  10200.70   9599.12    550.19 o
   1   1  14  18987.40  19532.00    923.49 o
   1   1 -14  18906.50  19275.60    918.35 o
   1   1  15   9450.64   9915.74    573.45 o
   1   1 -15   9808.20  10412.70    575.15 o
   1   1  16   4901.62   6549.54    484.24 o
   1   1 -16   4780.73   6169.11    472.93 o
   1   1  17   8849.97   9265.32    572.56 o
   1   1 -17   9787.77   9710.79    573.45 o
   1   1  18   3160.14   4152.83    408.64 o
   1   1 -18   2625.47   3761.35    396.26 o
   1   1  19   1716.83   2572.20    338.39 o
   1   1 -19   1880.81   2551.34    341.17 o
   1   1  20   7992.50   9084.92    640.32 o
   1   1 -20   9155.80  10285.10    623.56 o
   1   1  21   1005.89   1332.73    289.25 o
   1   1 -21   1200.24   1265.24    287.09 o
   1   1  22   1287.26   1530.31    302.81 o
   1   1 -22   1180.69   1769.62    329.37 o
   1   1  23   7099.40   8051.63    642.46 o
   1   1 -23   7823.12   9153.65    680.25 o
   1   1  24   1458.92   2420.03    375.32 o
   1   1 -24   1436.39   1785.57    356.68 o
   1   1  25     25.99    247.89    246.62 <
   1   1 -25     14.26     12.27    244.21 <
   1   1  26   2093.57   1813.79    373.45 o
   1   1 -26   2078.12   2305.90    383.76 o
   1   2   0  27487.30  27997.20    807.73 o
   1   2   1   8550.98   8313.02    456.46 o
   1   2  -1   5992.86   6005.89    261.31 o
   1   2   2  45407.20  45396.40   2784.55 o
   1   2  -2  49531.90  49555.40   1970.72 o
   1   2   3   4741.81   4356.54    269.24 o
   1   2  -3   3623.87   4048.52    263.40 o
   1   2   4  22487.30  23702.00    974.04 o
   1   2  -4  21158.10  21531.10    972.21 o
   1   2   5  35700.00  36542.20   1235.35 o
   1   2  -5  35630.50  36120.00   1527.24 o
   1   2   6   2111.45   2352.53    185.75 o
   1   2  -6   3027.56   3360.06    249.19 o
   1   2   7   9752.79   9260.41    417.77 o
   1   2  -7  10860.20  10555.10    408.33 o
   1   2   8  19187.80  17890.00    689.13 o
   1   2  -8  20218.30  18576.00    828.71 o
   1   2   9   4653.72   5691.73    301.94 o
   1   2  -9   5751.92   6025.53    557.60 o
   1   2  10  11307.90  12351.70    498.95 o
   1   2 -10  11780.70  12360.30    599.42 o
   1   2  11  12650.20  12384.90    508.57 o
   1   2 -11  12907.10  11685.40    607.84 o
   1   2  12   5780.32   5908.94    338.11 o
   1   2 -12   5703.78   6289.37    408.79 o
   1   2  13   4166.15   4766.43    309.35 o
   1   2 -13   3463.15   4215.41    356.11 o
   1   2  14  22223.40  23413.70   1062.03 o
   1   2 -14  22051.10  22514.10   1056.46 o
   1   2  15   5578.06   6668.58    445.05 o
   1   2 -15   4573.00   5127.22    411.80 o
   1   2  16   3894.79   4761.52    406.12 o
   1   2 -16   2620.58   3349.02    351.72 o
   1   2  17  11288.80  10674.10    607.95 o
   1   2 -17  10118.70   9521.81    591.67 o
   1   2  18   3653.63   4756.61    430.21 o
   1   2 -18   4363.02   4247.32    418.79 o
   1   2  19   1051.74   1117.97    265.00 o
   1   2 -19   1344.10   1610.08    290.47 o
   1   2  20   5994.12   7155.77    576.84 o
   1   2 -20   6578.81   7989.04    553.29 o
   1   2  21   2333.85   3601.82    406.02 o
   1   2 -21   3137.17   2988.22    368.49 o
   1   2  22   1715.21   2038.37    346.82 o
   1   2 -22   2167.60   2688.78    375.82 o
   1   2  23   5557.96   5787.45    543.00 o
   1   2 -23   5596.81   6807.25    567.01 o
   1   2  24   4371.49   5160.35    517.11 o
   1   2 -24   4217.93   4592.16    503.49 o
   1   2  25    497.51    586.60    282.21 <
   1   2 -25    435.41    746.14    306.62 <
   1   2  26   3998.64   4957.87    529.14 o
   1   2 -26   3747.06   4820.42    519.10 o
   1   3   0    229.58    222.12     72.41 o
   1   3   1  13444.80  13736.00    518.29 o
   1   3  -1  15802.20  15789.10    646.82 o
   1   3   2  25265.00  24015.00   1099.63 o
   1   3  -2  29951.00  27539.50   1116.02 o
   1   3   3   2193.08   2615.15    208.52 o
   1   3  -3   1467.41   1413.73    194.00 o
   1   3   4  23632.40  24590.50   1140.78 o
   1   3  -4  27782.70  28668.50   1146.51 o
   1   3   5  16763.40  16866.60    766.39 o
   1   3  -5  16767.90  16018.60    766.34 o
   1   3   6  12520.90  12630.30    610.54 o
   1   3  -6  12268.10  11287.70    600.27 o
   1   3   7  19256.20  20165.30    975.61 o
   1   3  -7  22515.80  22628.20    973.70 o
   1   3   8  31242.10  29829.40   1047.93 o
   1   3  -8  31271.40  27831.60   1289.70 o
   1   3   9   1838.44   2069.05    193.26 o
   1   3  -9   1919.45   1509.45    334.34 o
   1   3  10  13735.80  14672.30    580.45 o
   1   3 -10  14093.40  14698.10    692.45 o
   1   3  11  22334.60  21947.20    811.54 o
   1   3 -11  20547.00  20367.80    964.36 o
   1   3  12   3962.35   3821.49    282.77 o
   1   3 -12   5287.52   5375.11    367.82 o
   1   3  13   8494.43   7476.07    473.29 o
   1   3 -13   7900.14   7816.00    481.43 o
   1   3  14  11295.60  11185.90    581.03 o
   1   3 -14   8819.67   8733.95    567.32 o
   1   3  15   5159.92   6355.64    473.38 o
   1   3 -15   4999.23   5575.15    428.82 o
   1   3  16   1417.92   1617.44    274.59 o
   1   3 -16   2108.16   1974.56    273.93 o
   1   3  17   7588.73   8436.97    547.65 o
   1   3 -17   6244.55   7357.03    543.53 o
   1   3  18   2423.64   2537.84    336.02 o
   1   3 -18   1971.51   2450.71    321.84 o
   1   3  19   2272.43   2596.74    350.36 o
   1   3 -19   2565.12   3050.81    364.68 o
   1   3  20   5853.37   6842.84    547.88 o
   1   3 -20   6613.95   6960.65    549.86 o
   1   3  21   2543.96   3142.85    387.81 o
   1   3 -21   2256.75   2796.78    380.67 o
   1   3  22   1007.55    959.67    297.02 o
   1   3 -22   1109.03   1510.68    317.38 o
   1   3  23   6347.58   7249.04    618.27 o
   1   3 -23   7068.27   8209.93    614.64 o
   1   3  24   2616.14   2750.14    404.74 o
   1   3 -24   3106.12   3363.74    431.45 o
   1   3  25    290.49    506.83    291.99 <
   1   3 -25    339.11    468.79    263.79 <
   1   3  26   5007.39   5939.62    562.03 o
   1   3 -26   4478.94   5454.88    544.88 o
   1   4   0     87.30     79.77     83.45 <
   1   4   1  12444.30  12863.50    655.61 o
   1   4  -1  14444.30  16159.70    539.17 o
   1   4   2  30303.10  28160.40   1164.14 o
   1   4  -2  27300.90  25903.60    950.43 o
   1   4   3   7133.45   6713.98    408.08 o
   1   4  -3   8302.06   8016.04    428.51 o
   1   4   4  17159.60  16621.10    828.82 o
   1   4  -4  20543.60  19847.40    848.71 o
   1   4   5  40511.20  40358.80   1647.89 o
   1   4  -5  38656.80  36586.40   1653.26 o
   1   4   6   3950.83   3983.47    326.33 o
   1   4  -6   3974.13   3929.48    327.80 o
   1   4   7  32132.00  31558.50   1389.00 o
   1   4  -7  33528.80  30985.40   1388.86 o
   1   4   8  19646.90  19859.70    996.58 o
   1   4  -8  23286.00  22652.80   1000.35 o
   1   4   9   1931.07   3066.76    306.61 o
   1   4  -9   1698.43   2618.83    267.87 o
   1   4  10  13627.10  13738.40    700.15 o
   1   4 -10  13295.20  12102.60    669.87 o
   1   4  11  16822.10  15876.20    772.30 o
   1   4 -11  18038.00  15452.80   1148.67 o
   1   4  12   9734.99   9793.02    540.91 o
   1   4 -12  10046.90   9478.85    821.55 o
   1   4  13   5669.48   5656.14    402.57 o
   1   4 -13   3756.80   3264.34    559.18 o
   1   4  14  10572.20   9764.79    569.54 o
   1   4 -14  10249.10   9556.17    562.82 o
   1   4  15   4492.15   3992.07    370.88 o
   1   4 -15   3566.11   3504.87    349.92 o
   1   4  16   1896.33   2038.37    291.81 o
   1   4 -16   1987.52   1688.62    268.06 o
   1   4  17   5379.41   5523.60    456.05 o
   1   4 -17   5737.96   5994.85    455.63 o
   1   4  18   2837.30   3470.51    361.73 o
   1   4 -18   2497.73   2482.62    319.10 o
   1   4  19   2670.94   2675.29    344.83 o
   1   4 -19   3050.56   2858.14    346.50 o
   1   4  20   9255.07   9525.49    643.22 o
   1   4 -20   9043.04  10252.00    624.49 o
   1   4  21   5675.57   6106.52    539.92 o
   1   4 -21   5950.34   7426.98    564.60 o
   1   4  22   1942.91   1974.56    348.48 o
   1   4 -22   1880.34   2076.41    339.62 o
   1   4  23   7314.75   7228.18    591.79 o
   1   4 -23   7671.93   7937.50    602.86 o
   1   4  24   3113.21   3672.99    445.53 o
   1   4 -24   2855.26   3038.53    420.58 o
   1   4  25   1269.30   1451.77    347.10 o
   1   4 -25    887.91    948.62    523.98 <
   1   5   0   8420.74   8271.29    307.88 o
   1   5   1  14880.70  14191.30    481.69 o
   1   5  -1  15371.50  15770.70    565.25 o
   1   5   2  16647.10  16351.10    700.13 o
   1   5  -2  14747.00  13810.90    575.58 o
   1   5   3   5031.56   4919.82    342.82 o
   1   5  -3   5395.67   5326.03    294.86 o
   1   5   4  13887.30  13043.90    586.82 o
   1   5  -4  10442.80   9615.07    469.78 o
   1   5   5  24952.90  24518.10   1070.33 o
   1   5  -5  23475.70  22649.10    873.43 o
   1   5   6  14341.40  15422.20    755.13 o
   1   5  -6  14558.80  15066.30    612.77 o
   1   5  -7  14710.70  12203.20    546.35 o
   1   5   8  20043.00  20150.50   1038.88 o
   1   5  -8  24031.50  23365.80    852.91 o
   1   5   9  10360.60   9746.38    612.58 o
   1   5  -9  11217.30  10234.80    588.86 o
   1   5  10  14998.40  13695.50   1051.48 o
   1   5 -10  14325.20  12973.90   1029.42 o
   1   5  11  15206.40  12773.90   1086.84 o
   1   5 -11  17302.40  15163.20   1102.90 o
   1   5  12   1838.89   2164.77    479.46 o
   1   5 -12   2405.01   1721.75    427.89 o
   1   5  13   4020.71   4129.51    613.40 o
   1   5 -13   4063.34   3626.36    542.01 o
   1   5  14  12691.60  13037.70   1040.74 o
   1   5 -14  10858.70  10623.80   1004.51 o
   1   5  15   2109.77   2256.81    533.67 o
   1   5 -15   2495.96   2426.16    540.05 o
   1   5  16   3882.88   4108.65    666.00 o
   1   5 -16   3797.49   3150.21    597.39 o
   1   5  17   9114.15   9779.52    993.55 o
   1   5 -17   8317.97   8514.28    966.57 o
   1   5  18   4607.20   3701.22    669.04 o
   1   5 -18   4386.25   4343.04    682.39 o
   1   5  19   3463.80   3217.71    638.48 o
   1   5 -19   3421.24   3396.88    624.68 o
   1   5  20   2877.60   3082.71    648.93 o
   1   5 -20   3202.90   3539.23    668.36 o
   1   5  21   3549.50   3027.49    620.45 o
   1   5 -21   3350.89   3675.45    409.13 o
   1   5  22   1846.43   2018.74    607.31 o
   1   5 -22   1886.51   2449.48    621.64 o
   1   5  23   4862.52   5523.60    878.84 o
   1   5 -23   4512.52   4363.91    769.68 o
   1   5  24   1829.61   1924.24    617.20 o
   1   5 -24   2098.32   2061.69    612.40 o
   1   5  25   1945.54   2223.68    657.54 o
   1   5 -25   1828.24   2206.50    668.51 o
   1   6   1   9095.87   8757.26    384.97 o
   1   6  -1   8792.80   8584.23    393.93 o
   1   6   2  13467.70  12910.10    519.19 o
   1   6  -2  13762.10  13043.90    537.36 o
   1   6   3   8290.23   7531.30    434.39 o
   1   6  -3   7260.52   6593.72    364.14 o
   1   6   4  15704.40  14325.00    727.87 o
   1   6  -4  16555.80  14936.20    615.96 o
   1   6   5   9898.58  10206.60    510.12 o
   1   6  -5   7814.04   7041.64    409.89 o
   1   6   6  15700.20  15390.30    772.34 o
   1   6  -6  15182.60  14997.50    631.96 o
   1   6   7  23158.50  21904.20   1102.68 o
   1   6  -7  25189.30  24573.40    905.27 o
   1   6   8  11843.20  12058.40    999.48 o
   1   6  -8  12940.90  12899.00    698.48 o
   1   6   9   4545.59   4497.67    576.88 o
   1   6  -9   4464.96   3741.72    547.51 o
   1   6  10   4432.80   4662.11    605.77 o
   1   6 -10   4725.41   4081.65    589.08 o
   1   6  11  13173.80  15395.20   1171.95 o
   1   6 -11  12896.20  14186.40   1144.53 o
   1   6  12   4012.67   2995.58    548.98 o
   1   6 -12   4606.74   3250.84    544.88 o
   1   6  13   2748.70   2621.29    538.91 o
   1   6 -13   2034.40   1803.98    438.37 o
   1   6  14   7283.40   7235.54    854.24 o
   1   6 -14   8627.16   7828.28    862.27 o
   1   6  15   6932.37   5988.71    818.03 o
   1   6 -15   7786.26   6728.71    800.18 o
   1   6  16   3087.19   3034.85    602.62 o
   1   6 -16   3558.50   3603.04    650.35 o
   1   6  17   5268.56   4597.07    739.94 o
   1   6 -17   5549.88   5394.75    795.51 o
   1   6  18   3537.96   3296.25    627.44 o
   1   6 -18   3366.74   2944.04    638.69 o
   1   6  19   4235.90   3470.51    665.06 o
   1   6 -19   4882.12   4355.31    716.34 o
   1   6  20   5861.67   4873.19    785.92 o
   1   6 -20   5426.05   5549.38    820.77 o
   1   6  21   1965.53   2767.32    639.76 o
   1   6 -21   1880.02    759.63    518.53 <
   1   6  22   3590.10   3622.68    727.68 o
   1   6 -22   3249.39   4093.92    742.53 o
   1   6  23   2306.55   1883.74    633.59 <
   1   6 -23   2482.97   4228.91    777.09 o
   1   6  24   1938.65   1768.39    668.95 <
   1   6 -24   2386.26   2507.16    639.24 o
   1   7   0   6512.30   6306.56    248.08 o
   1   7   1  11350.90  10600.50    441.82 o
   1   7  -1  10890.20   9615.07    384.51 o
   1   7   2  10288.70   9456.76    418.75 o
   1   7  -2   9756.59   8639.45    433.30 o
   1   7   3   5515.56   5767.82    374.50 o
   1   7  -3   5028.26   3993.29    304.62 o
   1   7   4   7243.63   6350.73    434.40 o
   1   7  -4   6517.82   5852.49    364.99 o
   1   7   5  11375.10  12421.70    640.26 o
   1   7  -5  10424.10  11048.40    525.50 o
   1   7   6  11754.20  10917.10    870.50 o
   1   7  -6   9927.92   9342.63    600.13 o
   1   7   7  10797.70   9218.69    839.40 o
   1   7  -7  10619.40   9235.87    592.67 o
   1   7   8   4818.94   3911.07    593.23 o
   1   7  -8   5478.76   5641.42    463.36 o
   1   7   9  12105.80  10707.30    915.14 o
   1   7  -9  10716.70   9777.06    902.34 o
   1   7  10   5996.86   6250.10    728.38 o
   1   7 -10   6285.39   6624.40    751.49 o
   1   7  11   6050.67   5859.86    730.59 o
   1   7 -11   5845.98   4719.79    672.33 o
   1   7  12   4637.89   5220.49    713.13 o
   1   7 -12   5006.00   4006.79    642.40 o
   1   7  13   8210.75   8646.82    915.64 o
   1   7 -13   8551.90   6851.43    816.53 o
   1   7  14  10733.80   8946.25    961.95 o
   1   7 -14  10789.40   9094.74    975.20 o
   1   7  15   2587.13   2100.96    562.58 o
   1   7 -15   2581.52   2548.88    538.78 o
   1   7  16   3025.36   3714.72    654.34 o
   1   7 -16   3429.73   3421.42    645.52 o
   1   7  17   5609.19   6058.66    845.93 o
   1   7 -17   5782.85   5042.54    859.03 o
   1   7  18   5147.95   5037.64    795.41 o
   1   7 -18   4819.92   5718.73    836.62 o
   1   7  19   2396.87   2399.17    636.91 o
   1   7 -19   2500.46   1461.59    545.79 <
   1   7  20   2618.06   3307.29    698.69 o
   1   7 -20   2923.13   3221.39    681.96 o
   1   7  21   3080.48   2636.01    668.09 o
   1   7 -21   2868.44   4155.28    776.40 o
   1   7  22   2445.86   2487.52    662.64 o
   1   7 -22   2149.54   3094.99    713.25 o
   1   7  23   1573.23    973.17    558.71 <
   1   7 -23   1164.45   2086.23    675.54 o
   1   7  24    634.66    510.51    587.86 <
   1   7 -24    581.33   1700.89    646.12 <
   1   8   0   9069.58   8343.70    308.55 o
   1   8   1  13516.40  12991.10    536.05 o
   1   8  -1  12613.90  12499.00    464.71 o
   1   8   2   7952.91   7701.88    386.69 o
   1   8  -2   8600.86   8088.44    345.67 o
   1   8   3  10724.00   9222.37    427.68 o
   1   8  -3   9571.45   8331.43    371.12 o
   1   8   4   6987.75   6747.12    450.13 o
   1   8  -4   7565.75   6797.43    403.66 o
   1   8   5   6947.77   7174.18    693.97 o
   1   8  -5   5651.51   4797.10    445.62 o
   1   8   6   7221.23   6567.95    733.02 o
   1   8  -6   6814.56   5910.17    502.46 o
   1   8   7   4911.00   4482.94    612.01 o
   1   8  -7   4597.64   4039.93    418.75 o
   1   8   8  10278.80   9850.69    878.74 o
   1   8  -8  10318.80   8916.80    922.98 o
   1   8   9   6121.36   5106.36    682.03 o
   1   8  -9   6738.07   5592.33    735.12 o
   1   8  10   4075.52   4455.94    648.51 o
   1   8 -10   3619.84   3540.46    641.94 o
   1   8  11   5401.87   4819.19    703.06 o
   1   8 -11   5931.08   5796.04    739.06 o
   1   8  12   3111.46   2861.82    597.97 o
   1   8 -12   4071.01   3644.77    630.23 o
   1   8  13   4250.36   4346.72    698.11 o
   1   8 -13   4574.08   4026.43    666.06 o
   1   8  14   3069.95   2291.17    532.37 o
   1   8 -14   3038.85   1860.43    516.79 o
   1   8  15   5837.83   5275.71    799.93 o
   1   8 -15   6119.26   5410.70    786.76 o
   1   8  16   5722.27   5859.86    839.15 o
   1   8 -16   6363.11   4205.60    726.73 o
   1   8  17   4674.00   4590.94    758.54 o
   1   8 -17   4640.51   3992.07    748.34 o
   1   8  18   6314.24   5481.88    860.52 o
   1   8 -18   6018.15   5648.78    887.90 o
   1   8  19   3375.82   3555.18    731.18 o
   1   8 -19   3263.53   2654.42    663.39 o
   1   8  20   2227.50   1390.41    557.82 <
   1   8 -20   2256.66   3056.94    683.91 o
   1   8  21   1322.50   1314.33    607.47 <
   1   8 -21   1045.02   1159.70    566.90 <
   1   8  22   1570.35    607.46    485.23 <
   1   8 -22   1420.63    948.62    547.58 <
   1   8  23    852.35   1117.97    609.80 <
   1   8 -23    867.46    533.83    546.21 <
   1   9   0   6421.67   6081.98    265.96 o
   1   9   1   3860.44   4145.46    239.25 o
   1   9  -1   3818.00   3607.95    237.72 o
   1   9   2   6314.65   6458.73    358.88 o
   1   9  -2   6218.82   6230.47    320.24 o
   1   9   3  10355.80   9291.09    500.07 o
   1   9  -3  10659.30   9930.46    470.55 o
   1   9   4   7671.97   8229.57    778.96 o
   1   9  -4   7822.75   8486.05    575.47 o
   1   9   5   9539.77   9558.62    836.89 o
   1   9  -5   9480.21   8347.38    600.82 o
   1   9   6   8250.08   8841.94    843.92 o
   1   9  -6   8244.98   8261.48    590.22 o
   1   9   7   2882.80   3135.48    562.92 o
   1   9  -7   3717.48   3958.93    432.62 o
   1   9   8   5060.37   4964.00    662.88 o
   1   9  -8   5508.85   3941.75    639.84 o
   1   9   9   3443.25   3804.30    598.28 o
   1   9  -9   2523.61   1767.16    517.44 o
   1   9  10   8712.93   7970.63    903.79 o
   1   9 -10   8489.80   8354.74    902.32 o
   1   9  11   2594.64   2385.67    584.38 o
   1   9 -11   1813.12   1772.07    520.37 o
   1   9  12   4514.70   4093.92    713.67 o
   1   9 -12   4559.69   3839.89    676.12 o
   1   9  13   6067.36   4854.78    754.53 o
   1   9 -13   5587.57   6333.55    825.66 o
   1   9  14   4185.29   2910.91    654.60 o
   1   9 -14   3648.55   2201.59    562.67 o
   1   9  15   5416.46   6156.84    868.74 o
   1   9 -15   6588.84   5737.14    848.38 o
   1   9  16   6600.09   5738.36    856.97 o
   1   9 -16   6465.21   5177.54    822.11 o
   1   9  17   5452.13   5954.35    863.05 o
   1   9 -17   5551.53   4416.67    842.35 o
   1   9  18   2598.81   2453.16    661.60 o
   1   9 -18   2758.29   4133.19    782.46 o
   1   9  19   2872.78   1383.05    585.42 <
   1   9 -19   2551.96   2579.56    698.25 o
   1   9  20   1990.62   2380.76    653.74 o
   1   9 -20   2029.04   2307.13    656.30 o
   1   9  21   2121.53   2065.37    663.96 o
   1   9 -21   1986.08   1293.46    579.72 <
   1   9  22   1466.06    252.80    480.28 <
   1   9 -22   1237.29   1346.23    617.22 <
   1  10   0  15554.70  14411.00    532.55 o
   1  10   1   5382.00   5603.37    300.81 o
   1  10  -1   6056.27   6194.88    307.29 o
   1  10   2   5215.96   5026.59    438.70 o
   1  10  -2   6534.79   6382.64    373.77 o
   1  10   3   7513.03   7374.21    534.34 o
   1  10  -3   7617.26   7295.67    418.77 o
   1  10   4   7726.99   7819.69    824.44 o
   1  10  -4   8859.97   8711.86    598.22 o
   1  10   5   5212.77   5489.24    690.34 o
   1  10  -5   5113.50   4424.04    463.28 o
   1  10   6   7880.74   7608.61    809.41 o
   1  10  -6   7131.74   6672.26    574.56 o
   1  10   7   5675.89   5075.68    690.91 o
   1  10  -7   5132.65   5816.90    747.22 o
   1  10   8   3562.00   3439.83    585.57 o
   1  10  -8   3433.05   2891.27    597.16 o
   1  10   9   5463.50   4956.64    750.74 o
   1  10  -9   5210.29   5982.58    769.15 o
   1  10  10   3035.07   2535.39    582.31 o
   1  10 -10   2798.47   2357.44    596.91 o
   1  10  11   2392.71   2158.64    554.94 o
   1  10 -11   2538.86   2033.46    545.42 o
   1  10  12   5457.72   4917.37    739.77 o
   1  10 -12   5198.35   3669.31    692.15 o
   1  10  13   4429.97   4322.18    747.53 o
   1  10 -13   4469.84   5164.04    786.70 o
   1  10  14   1436.83    705.64    513.33 <
   1  10 -14   1755.08   1759.80    558.37 o
   1  10  15   5380.71   4403.18    729.42 o
   1  10 -15   4978.70   2983.31    671.72 o
   1  10  16   7155.38   6371.60    942.73 o
   1  10 -16   7665.60   7073.55    959.64 o
   1  10  17    813.19    715.46    580.50 <
   1  10 -17    824.54   1888.65    646.06 <
   1  10  18   5293.10   4206.82    820.15 o
   1  10 -18   5527.04   4689.11    883.61 o
   1  10  19   1736.48   1140.06    558.76 <
   1  10 -19   1747.72   1367.10    640.83 <
   1  10  20   1021.29    602.55    540.12 <
   1  10 -20   1069.35    688.46    551.16 <
   1  10  21   1909.62   1266.47    623.82 <
   1  10 -21   2234.56   2439.66    693.18 o
   1  11   0   9508.80   8900.84    464.61 o
   1  11   1   4881.39   5133.36    343.86 o
   1  11  -1   3946.43   4095.15    334.55 o
   1  11   2    566.34    686.00    265.00 <
   1  11  -2    105.16   -126.40    185.29 <
   1  11   3   5777.60   6214.52    515.28 o
   1  11  -3   7331.76   7613.52    433.12 o
   1  11   4   3005.94   3648.45    575.76 o
   1  11  -4   2943.86   2710.87    388.24 o
   1  11   5   5774.12   6072.16    712.33 o
   1  11  -5   5011.73   4776.24    491.50 o
   1  11   6   7937.15   8041.81    887.01 o
   1  11  -6   7884.01   8806.35    929.19 o
   1  11   7   3442.74   3539.23    631.86 o
   1  11  -7   3206.26   2929.31    599.24 o
   1  11   8   3240.56   2281.36    571.81 o
   1  11  -8   3312.51   2936.68    603.06 o
   1  11   9   4955.28   5111.27    743.40 o
   1  11  -9   4919.05   4857.24    733.97 o
   1  11  10   4551.43   3793.26    703.12 o
   1  11 -10   4117.07   5776.41    770.14 o
   1  11  11   1344.13    811.18    516.92 <
   1  11 -11   1513.13   1848.16    563.01 o
   1  11  12   5250.21   3562.55    659.37 o
   1  11 -12   5136.33   4178.60    742.77 o
   1  11  13   3573.97   2384.44    627.28 o
   1  11 -13   3276.12   3357.61    693.26 o
   1  11  14    696.90    692.14    539.97 <
   1  11 -14    941.66    404.97    478.78 <
   1  11  15   2772.54   2618.83    675.12 o
   1  11 -15   3281.74   1941.42    663.97 <
   1  11  16   2496.53   1934.06    633.73 o
   1  11 -16   2784.24    930.21    567.09 <
   1  11  17   1103.90    290.85    516.89 <
   1  11 -17   1275.35   1032.07    608.81 <
   1  11  18   2159.44   1757.34    648.27 <
   1  11 -18   2330.17   2740.33    739.61 o
   1  11  19   2856.11   2300.99    687.76 o
   1  11 -19   2755.96   2631.11    775.70 o
   1  11  20    496.08    325.21    509.32 <
   1  11 -20    448.06    576.78    538.71 <
   1  12   0   4045.82   4516.08    345.72 o
   1  12   1   2076.90   1903.38    256.84 o
   1  12  -1   2738.06   2933.00    286.64 o
   1  12   2   1080.34    876.22    309.42 <
   1  12  -2   1292.00   1402.68    250.19 o
   1  12   3   6874.73   7295.67    553.24 o
   1  12  -3   6746.45   6848.98    438.91 o
   1  12   4   4546.00   4395.81    448.32 o
   1  12  -4   5533.62   5480.65    516.80 o
   1  12   5   2127.56   1780.66    486.33 o
   1  12  -5   2372.14   2324.31    524.07 o
   1  12   6   6862.77   6478.36    792.40 o
   1  12  -6   6728.86   6223.11    781.60 o
   1  12   7   3174.15   2656.88    592.17 o
   1  12  -7   2673.41   2696.15    577.98 o
   1  12   8    962.59   1367.10    534.81 <
   1  12  -8   1030.62   1410.05    518.85 <
   1  12   9   6825.53   6423.14    859.85 o
   1  12  -9   6689.89   6134.75    839.29 o
   1  12  10   3146.43   2299.76    617.00 o
   1  12 -10   2921.50   2433.53    619.05 o
   1  12  11   1405.89   1898.47    578.84 o
   1  12 -11   1367.15    971.94    540.18 <
   1  12  12   3503.43   3785.90    724.89 o
   1  12 -12   3137.37   2845.86    681.43 o
   1  12  13   4851.85   4859.69    838.16 o
   1  12 -13   4787.47   5278.17    812.81 o
   1  12  14    247.15   -139.90    489.65 <
   1  12 -14    321.48    526.47    521.51 <
   1  12  15   1822.06   1516.81    660.43 <
   1  12 -15   1707.65    708.09    579.72 <
   1  12  16   1730.90   1345.01    642.06 <
   1  12 -16   1822.45   1306.96    675.26 <
   1  12  17    327.09   -306.80    532.57 <
   1  12 -17    386.78    624.64    617.22 <
   1  12  18   1487.40    847.99    631.07 <
   1  12 -18   1268.03   2146.36    711.16 o
   1  12  19   1752.79    670.05    589.56 <
   1  12 -19   1986.73   1504.54    682.63 <
   1  13   0   4631.91   5159.13    382.28 o
   1  13   1   1637.72   2027.33    343.04 o
   1  13  -1   1803.58   2019.96    280.63 o
   1  13   2   2542.34   2882.68    392.06 o
   1  13  -2   2571.89   3029.94    315.50 o
   1  13   3   4726.63   4638.80    472.70 o
   1  13  -3   5346.00   6279.56    487.84 o
   1  13   4   2712.56   2437.21    377.24 o
   1  13  -4   2949.11   2745.24    542.70 o
   1  13   5    423.41   1332.73    471.94 <
   1  13  -5    309.02    847.99    435.43 <
   1  13   6   3213.33   3119.53    617.41 o
   1  13  -6   2756.30   3356.38    637.35 o
   1  13   7   3636.57   4655.98    738.41 o
   1  13  -7   3554.41   3682.81    680.91 o
   1  13   8    999.05    413.57    491.07 <
   1  13  -8    777.95   1045.57    496.88 <
   1  13   9   6320.48   6765.53    879.01 o
   1  13  -9   5993.92   5745.73    838.63 o
   1  13  10   3293.11   3968.75    737.86 o
   1  13 -10   3333.81   4803.24    764.79 o
   1  13  11    581.38   1205.11    588.77 <
   1  13 -11    654.54   1111.84    563.08 <
   1  13  12   4878.68   4702.61    829.85 o
   1  13 -12   4761.44   4394.59    808.04 o
   1  13  13   1513.88   2049.42    670.88 o
   1  13 -13   1575.51   1600.26    633.22 <
   1  13  14    388.20    292.07    565.75 <
   1  13 -14    491.33    440.56    586.61 <
   1  13  15   1608.40   1645.67    654.07 <
   1  13 -15   1551.52    195.12    618.89 <
   1  13  16   2047.21   2055.55    698.27 <
   1  13 -16   1747.12   1941.42    706.73 <
   1  13  17    528.50    -11.04    575.60 <
   1  13 -17    418.80   -225.80    573.10 <
   1  13 -18   1277.75    278.57    591.78 <
   1  14   0   4770.54   4782.38    433.17 o
   1  14   1   2911.30   3085.17    554.44 o
   1  14  -1   2479.81   2125.50    334.43 o
   1  14   2    587.77    857.81    321.35 <
   1  14  -2    524.88    490.88    257.73 <
   1  14   3   5844.35   6869.84    566.28 o
   1  14  -3   5554.40   5286.76    720.90 o
   1  14   4   3110.40   3549.05    433.51 o
   1  14  -4   2968.20   3200.52    602.23 o
   1  14   5    169.77      6.14    406.21 <
   1  14  -5    164.51    493.33    409.80 <
   1  14   6   4790.14   5403.34    790.47 o
   1  14  -6   5027.05   6025.53    825.29 o
   1  14   7   1051.06    825.90    504.48 <
   1  14  -7   1026.02   1165.84    516.57 <
   1  14   8    503.10    467.56    503.16 <
   1  14  -8    467.26    755.95    501.82 <
   1  14   9   4114.99   4203.14    770.55 o
   1  14  -9   4138.14   4940.69    765.69 o
   1  14  10   2006.43   2947.72    705.93 o
   1  14 -10   1801.31   2329.22    631.53 o
   1  14  11    579.27    528.92    573.11 <
   1  14 -11    459.27    179.17    525.28 <
   1  14  12   2939.69   1743.84    694.35 <
   1  14 -12   3113.77   2007.69    689.47 <
   1  14  13   3006.49   2541.52    722.05 o
   1  14 -13   2987.71   3292.56    769.11 o
   1  14  14    129.94     98.18    562.06 <
   1  14 -14    138.24    757.18    623.27 <
   1  14  15    825.18    711.77    613.63 <
   1  14 -15   1110.71   1205.11    620.91 <
   1  14  16   1358.16    779.27    645.74 <
   1  14 -16   1482.87    495.79    660.56 <
   1  15   0   6058.69   7429.44    566.16 o
   1  15   1   1310.36   1364.64    469.97 <
   1  15  -1   1392.88   1644.44    317.51 o
   1  15   2    485.29    714.23    430.65 <
   1  15  -2    367.56    482.29    268.70 <
   1  15   3   3785.16   3573.59    638.46 o
   1  15  -3   3956.24   3914.75    623.48 o
   1  15   4   2218.46   4026.43    663.89 o
   1  15  -4   2190.35   2400.39    571.65 o
   1  15   5    418.97    384.11    455.30 <
   1  15  -5    469.30    258.94    414.84 <
   1  15   6   2459.56   2661.79    619.51 o
   1  15  -6   2141.80   2065.37    562.13 o
   1  15   7   1546.78   1726.66    565.59 o
   1  15  -7   1591.10   2109.55    566.49 o
   1  15   8    554.58    915.49    545.96 <
   1  15  -8    432.51    406.20    478.61 <
   1  15   9   2822.15   2670.38    686.16 o
   1  15  -9   2702.75   3627.59    676.20 o
   1  15  10   1105.12   1239.47    597.57 <
   1  15 -10   1261.16   2157.41    646.04 o
   1  15  11    161.19    538.74    559.53 <
   1  15 -11    188.83    578.01    565.66 <
   1  15  12   3237.40   2541.52    710.04 o
   1  15 -12   3264.28   3523.28    828.07 o
   1  15  13   2043.70   1942.65    671.35 <
   1  15 -13   2009.53   1656.71    675.21 <
   1  15 -14    268.29    -87.13    569.42 <
   1  16   0   3694.92   5346.89    706.33 o
   1  16   1   1507.38   1702.12    482.11 o
   1  16   2    948.39   1387.96    497.95 <
   1  16  -2    911.02    715.46    438.20 <
   1  16   3   2992.11   4138.10    702.78 o
   1  16  -3   2853.86   4357.77    694.82 o
   1  16   4   1082.78    497.01    496.01 <
   1  16  -4    972.79    654.09    481.20 <
   1  16   5    257.51    335.02    449.14 <
   1  16  -5    113.09    215.99    446.69 <
   1  16   6   2221.61   2285.04    646.67 o
   1  16  -6   2280.92   2832.37    633.85 o
   1  16   7    513.43    487.20    526.47 <
   1  16  -7    569.20    900.76    547.20 <
   1  16   8    186.61   -157.08    462.64 <
   1  16  -8    170.97    396.38    523.97 <
   1  16   9   2786.59   3113.39    728.59 o
   1  16  -9   2679.52   2989.45    727.40 o
   1  16  10   1140.91    692.14    558.55 <
   1  16 -10   1261.40   1648.12    655.08 <
   1  16  11    121.51     79.77    527.70 <
   1  16 -11    135.27    -38.04    509.29 <
   1  17   2    321.86    938.80    485.72 <
   1  17   3   2210.44   2712.10    617.96 o
   1  17   4   1208.13   1584.31    569.16 <
   1  17  -4   1222.95   1482.45    575.39 <
   1  17   5    327.22    164.44    468.81 <
   1  17  -5    311.49    709.32    482.16 <
   1  17   6   1317.24   1136.38    527.80 <
   1  17  -6   1143.20   1113.07    484.76 <
   1  17   7    512.38    250.35    488.47 <
   1  17  -7    490.58    430.74    477.39 <
   2   0   0   1143.54   1562.22    147.42 o
   2   0   1  29382.30  33798.20    948.58 o
   2   0   2   7337.66   7657.70    266.35 o
   2   0   3  38947.20  40590.70   1168.09 o
   2   0   4  33751.90  35408.30   1187.30 o
   2   0   5  32889.60  30931.40   1313.44 o
   2   0   6     61.03     18.41    169.35 <
   2   0   7  20280.10  20602.20    908.64 o
   2   0   8    531.15    887.26    175.07 o
   2   0   9  40201.80  39967.30   1698.69 o
   2   0  10    112.29     83.45    154.63 <
   2   0  12    269.72    284.71    165.66 <
   2   0  13  27087.50  25006.60   1153.72 o
   2   0  15  24721.70  23822.30   1120.69 o
   2   0  16     29.76    153.40    192.65 <
   2   0  17      9.08    -47.86    175.49 <
   2   0  18   2142.82   1864.11    312.17 o
   2   0  19  16600.30  18309.80    927.67 o
   2   0  20     36.93    630.78    243.93 <
   2   0  21   7736.56   8538.82    648.92 o
   2   0  22    599.59    839.40    263.66 o
   2   0  23    557.14    530.15    261.41 <
   2   0  24    367.88    274.89    244.24 <
   2   0  25   6912.72   8586.68    690.65 o
   2   0  26    180.57    170.58    257.71 <
   2   1   0  87206.90  94174.90   2624.54 o
   2   1   1  15919.10  17221.20    706.02 o
   2   1  -1  15005.10  15287.20    706.48 o
   2   1   2  12613.70  14467.40    450.15 o
   2   1  -2  10331.40  11481.60    347.45 o
   2   1   3   4575.28   4813.06    229.41 o
   2   1  -3   4430.21   4751.70    231.45 o
   2   1   4  16856.50  17613.90   1155.44 o
   2   1  -4  18708.30  19281.70    666.91 o
   2   1   5   5766.58   6074.62    275.57 o
   2   1  -5   5944.00   6099.16    349.03 o
   2   1   6  45271.90  46946.30   1592.22 o
   2   1  -6  45947.80  47892.50   1587.36 o
   2   1   7    336.62    234.39    112.97 <
   2   1  -7    490.24    444.24    147.30 o
   2   1   8   4952.28   5356.71    290.14 o
   2   1  -8   5778.88   4984.87    332.25 o
   2   1   9   4700.12   5927.35    309.61 o
   2   1  -9   4961.39   5662.28    367.86 o
   2   1  10  31553.10  29215.80   1092.27 o
   2   1 -10  33831.30  31619.90   1328.76 o
   2   1  11   1286.27   1824.84    338.01 o
   2   1 -11   1673.69   2223.68    244.22 o
   2   1  12  36711.90  34376.20   1506.87 o
   2   1 -12  34840.90  33711.00   1489.36 o
   2   1  13    292.34    193.90    176.75 <
   2   1 -13    236.33    343.61    166.85 <
   2   1  14   1359.03   1291.01    234.50 o
   2   1 -14   1151.66   1509.45    237.52 o
   2   1  15    614.75    500.70    205.02 <
   2   1 -15    519.03    414.79    195.19 <
   2   1  16  24989.80  25026.20   1180.36 o
   2   1 -16  26067.70  25194.30   1177.02 o
   2   1  17   1664.04   1716.85    285.85 o
   2   1 -17   1416.82   1508.22    274.76 o
   2   1  18  15351.60  15926.50    871.00 o
   2   1 -18  16939.40  18164.90    885.64 o
   2   1  19    491.57    758.41    244.02 o
   2   1 -19    577.63    759.63    255.12 <
   2   1  20    440.85    408.66    234.41 <
   2   1 -20    646.11   1044.34    262.25 o
   2   1  21    452.92    294.53    243.04 <
   2   1 -21    539.44    878.67    270.95 o
   2   1  22  10133.00  10477.80    671.09 o
   2   1 -22   9922.21  10151.40    661.76 o
   2   1  23    216.02    368.16    260.12 <
   2   1 -23    185.88   -106.77    229.48 <
   2   1  24   3534.03   5483.11    527.86 o
   2   1 -24   3765.10   4835.15    501.84 o
   2   1  25    243.23    559.60    273.52 <
   2   1 -25    232.79    368.16    266.26 <
   2   1  26   1158.88   1159.70    321.52 o
   2   1 -26   1020.43   1239.47    328.68 o
   2   2   0     18.92     25.77     79.77 <
   2   2   1   2873.65   2833.59    165.85 o
   2   2  -1   2484.26   2729.28    127.51 o
   2   2   2  11844.80  12139.40    435.94 o
   2   2  -2  11586.00  11092.60    442.69 o
   2   2   3 109375.00 113709.00   6783.24 o
   2   2  -3 115428.00 120820.00   3880.72 o
   2   2   4    269.24    413.57    190.14 <
   2   2  -4     81.34    257.71    139.83 <
   2   2   5  21427.00  21460.00    963.15 o
   2   2  -5  22329.10  22422.10    966.46 o
   2   2   6   1158.56   1560.99    199.27 o
   2   2  -6   1089.05   1028.39    187.85 o
   2   2   7  26557.90  26560.20   1067.64 o
   2   2  -7  23073.40  22244.10    848.97 o
   2   2   8   2858.27   3471.73    243.25 o
   2   2  -8   3898.40   4367.59    249.47 o
   2   2   9  37774.70  36904.20   1331.87 o
   2   2  -9  38556.60  38776.90   1315.05 o
   2   2  10     27.92    179.17    134.95 <
   2   2 -10    121.28    101.86    137.45 <
   2   2  11    714.93    633.23    157.17 o
   2   2 -11    399.75    350.98    154.66 <
   2   2  12    682.91    706.86    163.19 o
   2   2 -12    821.03    816.09    184.09 o
   2   2  13  19275.40  18276.60    875.76 o
   2   2 -13  18459.00  17436.00    856.13 o
   2   2  14   2056.18   2381.99    291.39 o
   2   2 -14   1877.12   2413.89    284.82 o
   2   2  15  25799.40  25087.50   1149.16 o
   2   2 -15  23405.80  23417.30   1124.05 o
   2   2  16   2468.27   3058.17    332.45 o
   2   2 -16   2430.51   3053.26    328.68 o
   2   2  17    398.06    319.07    214.79 <
   2   2 -17    404.81    114.13    191.53 <
   2   2  18    192.41    543.65    233.00 <
   2   2 -18    191.21    293.30    209.82 <
   2   2  19  13866.20  13845.20    803.91 o
   2   2 -19  15870.80  15835.70    811.36 o
   2   2  20    441.02    476.15    242.97 <
   2   2 -20    793.52    836.95    261.36 o
   2   2  21   8166.51   9250.60    625.46 o
   2   2 -21   8966.68  10293.70    642.56 o
   2   2  22    512.98    940.03    279.48 o
   2   2 -22    429.77    385.34    246.68 <
   2   2  23    825.14    868.85    290.81 <
   2   2 -23    518.55    262.62    238.18 <
   2   2  24    266.38    269.98    251.57 <
   2   2 -24    248.81    477.38    269.89 <
   2   2  25   9271.17  10366.10    734.81 o
   2   2 -25   8570.99   9928.01    753.87 o
   2   2  26    418.13    652.87    306.68 <
   2   2 -26    347.32    662.68    287.00 <
   2   3   0  23086.50  23554.80    706.42 o
   2   3   1   2396.00   2459.30    165.42 o
   2   3  -1   2747.32   2697.37    168.34 o
   2   3   2   4498.54   4589.71    247.45 o
   2   3  -2   5518.79   5744.50    260.08 o
   2   3   3   8264.52   8326.52    635.47 o
   2   3  -3   8158.05   8740.08    446.19 o
   2   3   4  22959.90  25196.80   1547.92 o
   2   3  -4  22233.30  25267.90   1082.82 o
   2   3   5   9819.57   9708.34    502.50 o
   2   3  -5   9720.35   9418.72    503.45 o
   2   3   6  48430.30  50285.50   2090.46 o
   2   3  -6  49602.10  49743.10   2096.38 o
   2   3   7   2500.42   2874.09    288.67 o
   2   3  -7   3250.67   3632.50    293.31 o
   2   3   8   5330.92   5902.81    413.92 o
   2   3  -8   6185.96   5672.10    394.74 o
   2   3   9    185.08    640.60    197.28 o
   2   3  -9     96.21    482.29    177.74 <
   2   3  10  25970.20  25088.80   1183.16 o
   2   3 -10  28100.40  26260.70   1171.01 o
   2   3  11   3765.05   4167.55    289.35 o
   2   3 -11   3577.99   3973.66    262.31 o
   2   3  12  33423.40  32363.60   1410.48 o
   2   3 -12  31620.50  30829.60   1385.34 o
   2   3  13   4852.33   5861.08    422.33 o
   2   3 -13   4091.07   4301.32    361.37 o
   2   3  14    176.76   -176.72    165.64 <
   2   3 -14    112.76     54.00    154.63 <
   2   3  15    372.21    511.74    209.77 <
   2   3 -15    447.23    819.77    200.92 o
   2   3  16  10717.50  10814.00    620.51 o
   2   3 -16  10062.50  10238.50    602.99 o
   2   3  17   2648.84   2777.14    353.17 o
   2   3 -17   2957.27   3028.72    345.90 o
   2   3  18  10715.50  11042.30    667.40 o
   2   3 -18  11402.30  11123.30    649.25 o
   2   3  19    336.09    308.03    235.63 <
   2   3 -19    543.23    779.27    241.57 o
   2   3  20    106.57    346.07    240.46 <
   2   3 -20    101.93    425.84    231.82 <
   2   3  21    345.96    570.65    247.77 <
   2   3 -21    448.26    495.79    247.87 <
   2   3  22  11168.40  10299.80    696.89 o
   2   3 -22  11850.10  12181.10    711.50 o
   2   3  23    740.79    928.99    285.78 o
   2   3 -23    817.71   1093.43    315.16 o
   2   3  24   5200.29   5748.18    554.46 o
   2   3 -24   4876.49   5704.00    540.21 o
   2   3  25     90.00    245.44    262.59 <
   2   3 -25    120.79    263.85    262.59 <
   2   4   0     68.44     54.00     89.59 <
   2   4   1  19832.30  20254.90    623.47 o
   2   4  -1  19904.20  20545.70    722.93 o
   2   4   2  11971.50  11403.10    560.29 o
   2   4  -2  12385.00  11790.90    570.30 o
   2   4   3  66817.10  65846.40   3664.17 o
   2   4  -3  60857.90  61438.30   2096.44 o
   2   4   4   2802.35   2910.91    272.13 o
   2   4  -4   4149.99   4628.98    308.64 o
   2   4   5   4156.73   4028.88    328.08 o
   2   4  -5   4808.53   4902.64    345.72 o
   2   4   6    880.82    911.81    195.09 o
   2   4  -6    654.36    493.33    185.43 <
   2   4   7  23162.20  21917.70    992.93 o
   2   4  -7  21715.90  20092.90    979.87 o
   2   4   8   7744.69   6347.05    455.98 o
   2   4  -8   7519.12   7692.06    463.12 o
   2   4   9  35695.80  34778.70   1597.05 o
   2   4  -9  37903.00  37407.40   1591.11 o
   2   4  10   2816.26   2810.28    482.30 o
   2   4 -10   2889.44   2714.56    302.32 o
   2   4  11   2209.02   1958.60    442.10 o
   2   4 -11   1764.51   2112.00    280.37 o
   2   4  12    781.76    552.24    338.82 <
   2   4 -12   1039.50   1246.83    348.34 o
   2   4  13  17572.60  16806.40   1217.79 o
   2   4 -13  16216.40  14730.00   1178.33 o
   2   4  14   4877.26   4810.60    651.77 o
   2   4 -14   3786.33   4236.28    615.26 o
   2   4  15  11586.90  12044.90    995.02 o
   2   4 -15  10872.30  10557.60    604.04 o
   2   4  16    303.80    244.21    206.19 <
   2   4 -16    135.76    309.25    199.98 <
   2   4  17    631.09    581.69    243.02 <
   2   4 -17    548.77    447.93    217.27 <
   2   4  18    757.07    868.85    256.39 o
   2   4 -18    964.54   1311.87    264.66 o
   2   4  19  15331.60  16584.30    856.43 o
   2   4 -19  14815.10  14638.00    823.06 o
   2   4  20   4181.48   4101.29    434.63 o
   2   4 -20   4488.54   4930.87    467.58 o
   2   4  21   6821.39   7258.86    597.48 o
   2   4 -21   7409.69   7914.18    589.74 o
   2   4  22    108.39    -50.31    245.44 <
   2   4 -22    216.70     90.81    228.28 <
   2   4  23   1233.15   1175.65    306.86 o
   2   4 -23   1558.52   1855.52    334.61 o
   2   4  24    930.37    807.49    478.66 <
   2   4 -24    763.40   1472.63    577.60 <
   2   4  25   7531.48   7609.84   1039.28 o
   2   4 -25   6903.03   7531.30   1014.91 o
   2   5   0  31580.80  31272.60   1084.77 o
   2   5   1   9487.80   9245.69    400.35 o
   2   5  -1   9468.17   9405.22    482.62 o
   2   5   2   7401.56   7036.74    400.58 o
   2   5  -2   7070.65   6794.98    407.45 o
   2   5   3   1808.30   1304.51    199.80 o
   2   5  -3   1595.84   1693.53    228.07 o
   2   5   4  23570.40  22157.00    994.05 o
   2   5  -4  22221.70  21082.00    998.13 o
   2   5   5   9795.92   9818.79    545.99 o
   2   5  -5  10639.90  10156.30    558.31 o
   2   5   6  26204.50  31018.60   1320.39 o
   2   5  -6  27608.00  29460.00   1334.37 o
   2   5   7   1999.05   2550.11    295.81 o
   2   5  -7   2722.28   2547.66    294.94 o
   2   5   8   1839.05   1643.21    260.51 o
   2   5  -8   2069.27   1875.15    274.03 o
   2   5   9   1623.71   1611.31    422.17 o
   2   5  -9   1589.91   1876.38    268.25 o
   2   5  10  13299.70  13769.10   1148.40 o
   2   5 -10  16622.70  16067.70    805.58 o
   2   5  11   4564.64   5095.31    639.51 o
   2   5 -11   4538.94   4608.12    404.77 o
   2   5  12  20527.60  19323.40   1404.75 o
   2   5 -12  20471.20  18736.80   1378.50 o
   2   5  13   5763.92   6154.38    724.41 o
   2   5 -13   5260.84   5404.57    688.16 o
   2   5  15    507.73    439.34    407.45 <
   2   5 -15    466.89    -67.50    332.62 <
   2   5  16  11400.50  10734.30   1014.36 o
   2   5 -16  10981.40  10449.60    993.09 o
   2   5  17   3412.09   3708.58    675.76 o
   2   5 -17   3264.72   3006.63    613.94 o
   2   5  18   8996.17   9390.50   1064.29 o
   2   5 -18   9339.92  10321.90   1081.20 o
   2   5  19    746.79    350.98    465.22 <
   2   5 -19    896.08    511.74    399.00 <
   2   5  20    613.23    808.72    493.25 <
   2   5 -20    599.99    849.22    466.23 <
   2   5  21   1337.63    865.17    529.16 <
   2   5 -21   1152.67   1108.16    536.31 <
   2   5  22   8144.95   9821.24   1138.89 o
   2   5 -22   8839.29   9619.98   1105.17 o
   2   5  23   2509.04   2934.22    667.12 o
   2   5 -23   2640.72   2725.60    673.64 o
   2   5  24   4923.15   5664.73    856.56 o
   2   5 -24   4078.95   3974.88    805.18 o
   2   5  25     59.83    195.12    478.60 <
   2   5 -25     77.71    590.28    539.86 <
   2   6   0   1044.68   1876.38    142.34 o
   2   6   1  13021.80  12568.90    447.69 o
   2   6  -1  13286.60  13224.30    519.53 o
   2   6   2   9673.51   8887.35    470.43 o
   2   6  -2   8439.00   7841.78    480.05 o
   2   6   3  33565.40  31991.70   1306.41 o
   2   6  -3  29252.50  26751.60   1300.33 o
   2   6   4   9660.20   9107.01    529.06 o
   2   6  -4  10052.00   9626.12    540.79 o
   2   6   5   3304.83   3372.33    311.51 o
   2   6  -5   2935.62   2411.44    294.53 o
   2   6   6   6559.00   7764.46    500.90 o
   2   6  -6   6773.99   8379.29    515.08 o
   2   6   7   9463.81   9245.69    808.16 o
   2   6  -7   9668.68   9460.45    580.15 o
   2   6   8  18014.40  19022.80   1288.34 o
   2   6  -8  18587.80  17271.50    907.64 o
   2   6   9  19333.50  16616.20   1359.29 o
   2   6  -9  22011.70  20454.90    977.21 o
   2   6  10   5796.36   5858.63    695.68 o
   2   6 -10   5505.27   5663.50    467.05 o
   2   6  11   2681.34   2681.42    524.01 o
   2   6 -11   2307.19   2335.35    325.15 o
   2   6  12    434.57    671.28    396.29 <
   2   6 -12    407.61    506.83    352.17 <
   2   6  13   8920.61   9460.45    979.16 o
   2   6 -13   9540.57   9896.10    920.62 o
   2   6  14   3249.19   3746.63    615.28 o
   2   6 -14   4017.64   3103.58    584.34 o
   2   6  15  11418.00  11545.50   1048.88 o
   2   6 -15  10940.20   9844.56    986.01 o
   2   6  16   1318.50   2059.23    539.30 o
   2   6 -16   1080.03   1731.57    495.26 o
   2   6  17    613.61    374.29    419.77 <
   2   6 -17    611.74   1154.79    467.26 <
   2   6  18   2399.73   1769.62    572.45 o
   2   6 -18   2183.01   2720.69    592.12 o
   2   6  19   8659.76   8456.60   1030.06 o
   2   6 -19   7962.94   8801.44   1003.18 o
   2   6  20   4782.94   3449.65    705.15 o
   2   6 -20   4236.20   5134.58    774.09 o
   2   6  21   5546.60   5991.17    887.71 o
   2   6 -21   5065.01   5970.30    906.62 o
   2   6  22    456.81    455.29    495.79 <
   2   6 -22    424.72    143.58    476.19 <
   2   6  23    560.88   -438.11    429.45 <
   2   6 -23    828.96    564.51    519.19 <
   2   6  24   2178.43   1465.27    582.25 <
   2   6 -24   2249.72   1945.10    651.90 <
   2   7   0  36638.20  38379.30   1140.74 o
   2   7   1  14700.80  14876.10    499.31 o
   2   7  -1  15246.50  14872.40    597.70 o
   2   7   2   1799.14   1221.06    169.42 o
   2   7  -2   2016.69   1790.48    198.15 o
   2   7   3    109.89    -58.91    159.54 <
   2   7  -3    148.81    204.94    149.70 <
   2   7   4  12230.60  10707.30    600.37 o
   2   7  -4  11425.20  10780.90    498.36 o
   2   7   5  10998.70  10342.80    582.42 o
   2   7  -5  10333.20   9624.89    531.21 o
   2   7   6  15214.10  14841.70   1103.37 o
   2   7  -6  16546.20  14839.20    800.35 o
   2   7   7   9005.63   8122.80    747.56 o
   2   7  -7   7568.76   7190.14    540.11 o
   2   7   8    713.98    392.70    357.23 <
   2   7  -8   1224.87   1140.06    278.67 o
   2   7   9   2062.22   1920.56    466.49 o
   2   7  -9   2529.58   2275.22    350.21 o
   2   7  10   8805.55   9770.93    964.51 o
   2   7 -10  11266.40  10944.10    671.47 o
   2   7  11  13307.90  13717.60   1194.05 o
   2   7 -11  14467.70  14565.60    824.22 o
   2   7  12  14554.20  12133.30   1126.64 o
   2   7 -12  14444.00  14219.50   1137.14 o
   2   7  13   3133.42   2850.77    583.30 o
   2   7 -13   4269.83   3290.11    600.45 o
   2   7  14    469.48    818.54    462.51 <
   2   7 -14    449.74    274.89    390.29 <
   2   7  15   1508.95   1568.36    533.78 <
   2   7 -15   1833.43   1687.39    518.01 o
   2   7  16  11288.60  14900.60   1273.33 o
   2   7 -16  10382.00  13641.50   1230.63 o
   2   7  17   5245.89   4763.97    782.53 o
   2   7 -17   4700.63   5092.86    790.89 o
   2   7  18   4512.28   3336.74    685.26 o
   2   7 -18   4650.97   3930.71    694.52 o
   2   7  19   1853.38   1624.81    590.46 <
   2   7 -19   1644.73   2168.45    588.58 o
   2   7  20     36.63     -4.91    483.52 <
   2   7 -20     72.68    256.48    455.27 <
   2   7  21   1587.43    304.34    493.84 <
   2   7 -21   1498.97   1711.94    579.08 <
   2   7  22   3929.63   3239.79    716.35 o
   2   7 -22   4030.23   4307.45    788.69 o
   2   7  23   3080.21   2208.95    645.18 o
   2   7 -23   3109.59   2669.15    771.11 o
   2   7  24   1557.42    863.95    544.02 <
   2   7 -24   1443.70   2368.49    686.49 o
   2   8   0   1400.84   1273.83    134.10 o
   2   8   1   8854.28   8891.03    310.20 o
   2   8  -1   8879.32   8347.38    418.92 o
   2   8   2  13400.90  13328.60    562.51 o
   2   8  -2  14141.70  13886.90    580.87 o
   2   8   3  17287.30  17184.40    669.53 o
   2   8  -3  17531.40  16386.70    693.42 o
   2   8   4  12922.50   9768.47    899.89 o
   2   8  -4  12987.20  12310.00    664.87 o
   2   8   5   2033.81   1424.77    414.20 o
   2   8  -5   2850.26   3147.76    352.75 o
   2   8   6     88.78    173.04    317.83 <
   2   8  -6    242.15    403.75    244.15 <
   2   8   7   5686.22   5224.17    655.11 o
   2   8  -7   4798.95   4549.21    452.29 o
   2   8   8  10782.80  11101.20    918.15 o
   2   8  -8  10183.80   8770.76    644.79 o
   2   8   9   8693.28   7850.37    877.08 o
   2   8  -9  10073.40   9035.84    647.07 o
   2   8  10   3603.50   3999.43    626.45 o
   2   8 -10   3139.09   3004.17    411.38 o
   2   8  11    837.40    417.25    403.90 <
   2   8 -11    602.47    765.77    288.28 <
   2   8  12   3319.16   3828.85    653.33 o
   2   8 -12   2907.66   2780.82    586.76 o
   2   8  13   4219.59   3324.47    640.72 o
   2   8 -13   3535.39   3876.71    656.03 o
   2   8  14   8301.37   7903.14    949.52 o
   2   8 -14   8860.08   8143.67    963.78 o
   2   8  15   8796.95   7147.18    914.29 o
   2   8 -15   7603.81   5727.32    807.76 o
   2   8  16   1453.93    634.46    463.08 <
   2   8 -16   1841.56   1207.56    507.30 <
   2   8  17    151.32    985.44    506.52 <
   2   8 -17    136.61    677.41    496.87 <
   2   8  18   1763.92   2391.80    636.34 o
   2   8 -18   1602.29   1391.64    546.25 <
   2   8  19   4609.73   3130.57    733.36 o
   2   8 -19   4702.32   5362.84    838.32 o
   2   8  20   6020.05   6104.07    944.80 o
   2   8 -20   5008.75   5216.81    893.08 o
   2   8  21   2952.49   1392.87    597.75 <
   2   8 -21   3260.45   4125.83    765.84 o
   2   8  22    309.44     -9.82    493.35 <
   2   8 -22    294.69    192.67    492.12 <
   2   8  23    199.46    289.62    524.00 <
   2   8 -23    169.46    219.67    536.28 <
   2   9   0  13767.60  13143.30    482.01 o
   2   9   1  11568.00  11259.50    443.90 o
   2   9  -1  13743.40  13021.80    465.71 o
   2   9   2   1527.16   1483.68    203.80 o
   2   9  -2   1351.16   1370.78    213.50 o
   2   9   3     22.66     46.63    203.71 <
   2   9  -3     25.32    -65.04    212.30 <
   2   9   4   5847.42   5220.49    642.01 o
   2   9  -4   6395.14   5467.15    469.39 o
   2   9   5  15359.80  14537.40   1118.43 o
   2   9  -5  16118.30  14584.00    817.54 o
   2   9   6   8580.83   8222.21    839.13 o
   2   9  -6   9390.36   8157.17    604.78 o
   2   9   7   9149.57   9914.51    875.20 o
   2   9  -7   8268.38   7586.52    613.46 o
   2   9   8    803.52    551.01    432.07 <
   2   9  -8   1078.36    786.63    303.34 <
   2   9   9   1322.39    987.89    473.90 <
   2   9  -9   1221.74   1203.88    327.68 o
   2   9  10   3507.34   3498.73    629.56 o
   2   9 -10   3539.28   2854.46    422.26 o
   2   9  11  13990.80  12149.20   1140.66 o
   2   9 -11  13398.30  13874.70   1185.23 o
   2   9  12   4342.33   5036.41    726.50 o
   2   9 -12   4079.13   4189.64    736.15 o
   2   9  13   3166.03   3794.49    677.75 o
   2   9 -13   3441.62   2559.93    624.49 o
   2   9  14    496.28    850.45    495.65 <
   2   9 -14    427.16    159.54    488.46 <
   2   9  15   2701.31   1882.52    620.49 o
   2   9 -15   2438.21   1951.24    563.77 o
   2   9  16   3402.31   3861.98    722.19 o
   2   9 -16   3837.84   3693.86    740.19 o
   2   9  17   8989.90   8373.15   1049.37 o
   2   9 -17   9264.96   8811.26   1088.29 o
   2   9  18   3461.25   2300.99    656.59 o
   2   9 -18   3471.39   3227.52    707.17 o
   2   9  19   1091.84   1219.83    663.85 <
   2   9 -19    759.94   -186.53    501.99 <
   2   9  20     59.36    198.81    543.64 <
   2   9 -20     63.50   -341.16    476.11 <
   2   9  21   1368.40   1628.49    671.12 <
   2   9 -21    915.11   1896.02    662.07 <
   2   9  22   2142.50   2375.85    702.98 o
   2   9 -22   2337.87   3155.12    762.49 o
   2  10   0    445.45    443.02    149.72 <
   2  10   1   2087.96   2648.29    245.17 o
   2  10  -1   2484.99   2741.55    254.54 o
   2  10   2  11918.10  11738.10    685.60 o
   2  10  -2  13918.70  13219.30    571.37 o
   2  10   3   6324.12   6015.71    464.96 o
   2  10  -3   6385.09   6327.42    384.37 o
   2  10   4  12548.80  11838.80    996.33 o
   2  10  -4  12659.70  12712.50    738.53 o
   2  10   5    874.54   1241.92    409.62 o
   2  10  -5    976.66   1068.89    321.45 o
   2  10   6    641.50   1192.83    445.14 <
   2  10  -6    984.82    827.13    308.15 <
   2  10   7   4438.82   4300.09    669.06 o
   2  10  -7   4224.08   4085.33    469.11 o
   2  10   8  10655.10  10427.50    990.99 o
   2  10  -8   9169.61   9012.52    700.04 o
   2  10   9   4295.05   3768.72    688.03 o
   2  10  -9   4182.16   5517.47    535.38 o
   2  10  10   3123.12   2208.95    571.72 o
   2  10 -10   3257.00   2917.04    437.51 o
   2  10  11    107.68    -40.50    423.38 <
   2  10 -11    117.72    -31.91    472.47 <
   2  10  12   2664.91   2558.70    608.81 o
   2  10 -12   2176.61   2750.14    630.16 o
   2  10  13   3611.94   2039.60    616.57 o
   2  10 -13   3693.53   3342.88    697.51 o
   2  10  14  10952.70   9676.43   1129.61 o
   2  10 -14  10913.90  10048.30   1143.38 o
   2  10  15   2549.94   1265.24    572.89 <
   2  10 -15   2390.18   2239.63    606.39 o
   2  10  16   2838.68   2321.85    636.23 o
   2  10 -16   2836.73   2211.41    660.84 o
   2  10  17    169.57     22.09    499.47 <
   2  10 -17    167.07    667.59    517.75 <
   2  10  18   2435.33   2318.17    718.01 o
   2  10 -18   3012.95   2904.77    695.94 o
   2  10  19   1956.69   1969.65    683.54 <
   2  10 -19   2262.41   2383.21    688.35 o
   2  10  20   4245.32   2996.81    745.21 o
   2  10 -20   3758.35   2800.46    745.98 o
   2  10  21    780.87    109.22    573.20 <
   2  10 -21    971.22   1380.59    640.38 <
   2  11   0    506.42    521.56    192.66 <
   2  11   1  11159.30   9739.02    663.63 o
   2  11  -1  12611.30  12716.20    549.14 o
   2  11   2   1224.70   1100.79    271.35 o
   2  11  -2   1327.81   1039.43    222.51 o
   2  11   3    716.65    738.77    250.33 <
   2  11  -3    847.06    898.31    220.84 o
   2  11   4   1015.28    757.18    418.61 <
   2  11  -4   1140.44   1254.19    237.92 o
   2  11   5   9673.57   9618.75    980.67 o
   2  11  -5  11101.00  11609.30    559.29 o
   2  11   6   5433.19   6177.70    772.84 o
   2  11  -6   5506.60   6010.80    556.97 o
   2  11   7   8261.80   7730.10    927.74 o
   2  11  -7   8345.55   8846.85    670.78 o
   2  11   8    464.55     40.50    429.57 <
   2  11  -8    351.12    179.17    306.83 <
   2  11   9   1260.16    213.53    469.12 <
   2  11  -9    948.34    425.84    335.27 <
   2  11  10   1953.60   2448.25    577.49 o
   2  11 -10   2084.14   2086.23    591.51 o
   2  11  11  11328.60  11377.30   1131.34 o
   2  11 -11   9825.12  12512.50   1179.66 o
   2  11  12   2343.40   1054.16    534.78 <
   2  11 -12   2522.76   1816.25    606.87 <
   2  11  13   2572.16   2276.45    662.97 o
   2  11 -13   2469.46   2813.96    681.96 o
   2  11  14     10.28   -105.54    495.78 <
   2  11 -14     12.66    433.20    523.95 <
   2  11  15   2445.00   2880.23    718.70 o
   2  11 -15   2886.16   2577.11    670.38 o
   2  11  16    656.53    455.29    546.15 <
   2  11 -16    814.67    608.69    570.71 <
   2  11  17   5676.49   4281.68    845.17 o
   2  11 -17   6639.37   5696.64    913.46 o
   2  11  18    695.36   -142.35    517.93 <
   2  11 -18    663.59   1120.43    630.59 <
   2  11  19   1571.38   2539.07    726.94 o
   2  11 -19   1373.74   1293.46    636.96 <
   2  11  20     27.13   -466.33    514.12 <
   2  11 -20     30.91    735.09    607.31 <
   2  12   0      0.74    255.26    193.84 <
   2  12   1   1087.38   1099.57    294.52 o
   2  12  -1    684.25    575.55    209.93 <
   2  12   2   8524.52   8050.40    634.87 o
   2  12  -2  10374.10  10989.50    519.39 o
   2  12   3   2692.23   2694.92    369.38 o
   2  12  -3   2745.74   2984.54    298.82 o
   2  12   4   9177.47   9061.61    615.28 o
   2  12  -4   9076.15   8567.05    493.29 o
   2  12   5    691.79    487.20    463.95 <
   2  12  -5    587.16    657.78    235.57 <
   2  12   6    315.84    829.58    487.01 <
   2  12  -6    426.45    737.54    327.50 <
   2  12   7    479.71    843.08    511.60 <
   2  12  -7    578.60    698.27    337.42 <
   2  12   8  13580.90  16343.80   1273.53 o
   2  12  -8  13007.50  13808.40    918.48 o
   2  12   9   1900.91   1866.56    584.17 o
   2  12  -9   1809.63   1936.51    617.17 o
   2  12  10   4652.44   4098.83    735.95 o
   2  12 -10   4178.59   5069.54    799.94 o
   2  12  11     86.93    181.62    509.28 <
   2  12 -11    135.45   2022.42    618.60 o
   2  12  12   1938.68   1386.73    586.99 <
   2  12 -12   1703.88   2100.96    664.83 o
   2  12  13    930.07    339.93    541.35 <
   2  12 -13    958.34   1025.93    592.71 <
   2  12  14   6478.09   5117.40    894.43 o
   2  12 -14   6853.85   6331.10    920.16 o
   2  12  15    588.94    379.20    551.06 <
   2  12 -15    745.09    323.98    580.55 <
   2  12  16   1084.31   1502.09    637.90 <
   2  12 -16   1022.67   1178.11    642.98 <
   2  12  17     56.54    457.74    585.31 <
   2  12 -17     65.44   1578.17    659.57 <
   2  12  18   1693.57   2102.19    711.47 <
   2  12 -18   2014.49   1262.78    660.69 <
   2  12  19    966.21   1012.44    668.80 <
   2  12 -19    704.52    765.77    611.12 <
   2  13   0   2433.57   2666.69    300.13 o
   2  13   1   6457.73   6599.85    568.98 o
   2  13  -1   7495.19   8016.04    465.23 o
   2  13   2    768.52    672.50    306.86 <
   2  13  -2    962.67   1187.92    245.17 o
   2  13   3    139.81    408.66    304.27 <
   2  13  -3    109.97    571.87    230.49 <
   2  13   4    144.30    279.80    285.91 <
   2  13  -4    246.28    379.20    229.43 <
   2  13   5   9370.65  10639.80   1103.80 o
   2  13  -5   9384.91  11280.40    753.75 o
   2  13   6    547.86    490.88    471.26 <
   2  13  -6    459.13    565.74    342.34 <
   2  13   7   5638.71   6761.84    856.81 o
   2  13  -7   5145.46   5063.41    567.16 o
   2  13   8    294.25    -69.95    452.85 <
   2  13  -8    219.45     22.09    445.48 <
   2  13   9   1009.00    360.80    508.26 <
   2  13  -9    898.97    790.31    504.42 <
   2  13  10    904.67    435.65    513.11 <
   2  13 -10    809.96    924.08    531.33 <
   2  13  11   9153.94   8353.52   1054.68 o
   2  13 -11   8793.12   9742.70   1123.21 o
   2  13  12    694.08    516.65    531.43 <
   2  13 -12    805.67   1720.53    626.55 <
   2  13  13   2621.43   2487.52    703.31 o
   2  13 -13   2964.54   2609.02    736.67 o
   2  13  14    188.63    952.30    603.54 <
   2  13 -14    205.29    611.14    601.24 <
   2  13  15   1131.39    640.60    611.32 <
   2  13 -15   1067.46   1265.24    665.04 <
   2  13  16    148.94    181.62    568.19 <
   2  13 -16    189.37   1784.34    672.94 <
   2  13  17   4139.83   2729.28    818.78 o
   2  13 -17   4276.72   4851.10    899.97 o
   2  14   0    151.26     76.09    289.62 <
   2  14   1    395.66    166.90    303.17 <
   2  14  -1    379.23    740.00    237.82 o
   2  14   2   8336.13   9524.26    673.13 o
   2  14  -2   7943.97   8720.45    508.30 o
   2  14   3     78.49    212.30    295.73 <
   2  14  -3    140.09    456.52    242.86 <
   2  14   4   5686.75   6851.43    578.23 o
   2  14  -4   5379.70   6858.79    467.13 o
   2  14   5    181.75    241.76    300.65 <
   2  14  -5    145.97    618.51    342.22 <
   2  14   6    631.38    360.80    449.23 <
   2  14  -6    796.22     39.27    441.92 <
   2  14   7    270.86   1025.93    479.51 <
   2  14  -7    352.46   -119.04    422.17 <
   2  14   8   7686.22   8125.26    955.01 o
   2  14  -8   7298.34   7214.68    941.43 o
   2  14   9    272.73   -241.76    479.81 <
   2  14  -9    152.00   -154.63    433.19 <
   2  14  10   3361.12   4282.91    812.43 o
   2  14 -10   3291.64   5119.86    822.00 o
   2  14  11     86.28     28.23    527.70 <
   2  14 -11     96.79    272.44    495.77 <
   2  14  12    568.02    290.85    536.34 <
   2  14 -12    462.31   -182.85    551.02 <
   2  14  13    117.56    312.93    586.58 <
   2  14 -13    166.15    133.76    557.15 <
   2  14  14   4775.57   4298.86    833.95 o
   2  14 -14   4583.00   4595.85    874.97 o
   2  14  15    200.02    -31.91    608.69 <
   2  14 -15    286.18    154.63    601.34 <
   2  15   0    251.79    554.69    330.00 <
   2  15   1   5963.48   6669.80    585.76 o
   2  15  -1   5587.72   6480.82    461.93 o
   2  15   2    167.63   -157.08    299.42 <
   2  15  -2    148.36    601.33    256.27 <
   2  15   3    120.28     57.68    312.94 <
   2  15  -3    119.00    202.49    249.10 <
   2  15   4    141.17     46.63    306.80 <
   2  15  -4    169.74    433.20    414.73 <
   2  15   5   6301.54   7137.37    619.73 o
   2  15  -5   5959.78   6848.98    826.48 o
   2  15   6     41.16    197.58    312.92 <
   2  15  -6     39.59     76.09    428.29 <
   2  15   7   3082.09   2372.17    632.79 o
   2  15  -7   2814.32   3275.38    679.30 o
   2  15   8    138.00     27.00    471.25 <
   2  15  -8    124.54   -478.61    426.96 <
   2  15   9    344.54     47.86    506.85 <
   2  15  -9    480.47    955.98    566.79 <
   2  15  10    595.27    192.67    531.44 <
   2  15 -10    532.36    673.73    548.51 <
   2  15  11   5320.11   5210.67    853.08 o
   2  15 -11   5658.50   5746.95    928.84 o
   2  15  12    106.09     24.54    558.38 <
   2  15 -12    146.54    247.89    520.32 <
   2  15  13   1805.86   2177.04    727.45 <
   2  15 -13   1953.09   3239.79    752.22 o
   2  16   0    151.05   -670.05    374.06 <
   2  16   1      2.91     34.36    315.39 <
   2  16  -1      1.17   -269.98    377.94 <
   2  16   2   4773.72   6548.31    611.46 o
   2  16   3    359.06    -98.18    326.45 <
   2  16  -3    333.14    455.29    419.67 <
   2  16   4   3191.94   3350.24    475.86 o
   2  16  -4   2828.79   3614.09    622.29 o
   2  16   5     25.79    -50.31    316.61 <
   2  16  -5     26.34    223.35    430.73 <
   2  16   6    285.60    276.12    350.98 <
   2  16  -6    261.40    344.84    470.00 <
   2  16   7     57.29    530.15    489.55 <
   2  16  -7     49.90     -3.68    428.29 <
   2  16   8   3764.67   3345.33    741.75 o
   2  16  -8   3855.27   4408.08    757.59 o
   2  16   9    283.79    136.22    508.07 <
   2  16  -9    306.94    553.47    559.54 <
   2  16  10   2383.27   3153.89    714.62 o
   2  16 -10   2345.95   2731.74    711.40 o
   2  17   1   3313.45   4270.64    707.90 o
   2  17   2    151.51    265.07    461.41 <
   2  17   3    142.09    301.89    473.67 <
   2  17   4     54.58     45.41    462.65 <
   2  17   5   3382.87   3584.64    691.86 o
   2  17  -5   3281.11   3863.21    814.16 o
   2  17   6     40.66    781.72    517.67 <
   2  17  -6     30.26   -760.86    398.58 <
   3   0   1  73928.30  82131.20   2290.19 o
   3   0   2  44051.80  45960.90   1330.23 o
   3   0   3   4371.10   4381.09    244.16 o
   3   0   4   9254.01  10227.40    409.79 o
   3   0   5  23874.20  25216.40   1081.58 o
   3   0   7  11368.50  11014.10    447.83 o
   3   0   8   8058.02   7566.88    350.20 o
   3   0   9   4423.46   5793.59    292.85 o
   3   0  10   3858.45   4856.01    287.92 o
   3   0  11  15189.90  14919.00    735.34 o
   3   0  12   4617.57   5069.54    407.20 o
   3   0  13   9339.05   8633.32    524.75 o
   3   0  14  16105.90  16032.10    809.11 o
   3   0  15   2457.42   3434.92    358.54 o
   3   0  16   6344.26   7512.89    546.97 o
   3   0  17  10584.60  11241.10    657.30 o
   3   0  18   3331.93   3804.30    407.53 o
   3   0  19    426.99   1117.97    276.76 o
   3   0  20   8807.82   8784.26    645.59 o
   3   0  21   5288.89   6205.93    540.99 o
   3   0  22     51.71   -230.71    212.26 <
   3   0  23   7294.33   8374.38    660.43 o
   3   0  24   1042.14   1759.80    337.85 o
   3   0  25    248.08    269.98    262.61 <
   3   1   0   6059.67   6972.92    393.51 o
   3   1   1  22441.60  24159.80    713.97 o
   3   1  -1  21383.10  23362.10    708.56 o
   3   1   2  20189.50  22274.80    742.41 o
   3   1  -2  19223.60  20246.30    644.50 o
   3   1   3   7596.19   8418.56    342.11 o
   3   1  -3   7284.13   7658.92    298.15 o
   3   1   4   5342.20   4854.78    390.69 o
   3   1  -4   2902.28   3069.21    179.65 o
   3   1   5  38852.10  42177.50   1740.22 o
   3   1  -5  39157.30  42410.60   1416.87 o
   3   1   6   3972.06   4205.60    416.63 o
   3   1  -6   3382.94   3807.99    293.11 o
   3   1   7  15785.70  14792.60    756.36 o
   3   1  -7  17523.40  17051.90    535.43 o
   3   1   8  25668.90  25221.30    912.68 o
   3   1  -8  26856.30  25263.00    918.90 o
   3   1   9   3750.88   4220.32    269.33 o
   3   1  -9   3955.51   4678.07    347.30 o
   3   1  10  11429.20  12361.50    500.89 o
   3   1 -10  12728.10  11907.50    617.93 o
   3   1  11  15664.10  14877.30    593.21 o
   3   1 -11  13290.40  13764.20    706.89 o
   3   1  12     78.15    107.99    133.76 <
   3   1 -12    103.55    -61.36    164.44 <
   3   1  13   4598.31   5724.86    445.56 o
   3   1 -13   4195.27   5242.58    423.85 o
   3   1  14  12296.60  11840.00    672.22 o
   3   1 -14  11315.00  12850.00    656.26 o
   3   1  15   2141.37   2474.03    330.71 o
   3   1 -15   2358.94   2906.00    317.82 o
   3   1  16   4751.38   6359.32    462.19 o
   3   1 -16   4191.26   5495.38    458.83 o
   3   1  17  18938.50  19004.30    948.27 o
   3   1 -17  19337.50  18196.80    937.49 o
   3   1  18   4592.78   4104.97    434.48 o
   3   1 -18   4784.79   5371.43    454.74 o
   3   1  19    943.83    978.07    265.04 o
   3   1 -19    984.96   1174.43    271.00 o
   3   1  20   9517.78  10063.00    681.44 o
   3   1 -20   9925.98  10789.50    652.86 o
   3   1  21   2308.47   2296.08    366.95 o
   3   1 -21   2937.77   3422.65    402.70 o
   3   1  22    926.50   1320.46    312.54 o
   3   1 -22    773.86    835.72    277.30 o
   3   1  23   2229.14   2363.58    378.98 o
   3   1 -23   1951.16   2885.14    400.92 o
   3   1  24   3833.31   3857.07    462.60 o
   3   1 -24   3536.17   4101.29    469.99 o
   3   1  25    977.74   1033.30    316.57 o
   3   1 -25   1028.72   1359.73    326.10 o
   3   2   0    638.77    947.39    114.75 o
   3   2   1  43813.80  47661.80   1599.00 o
   3   2  -1  45306.40  48350.30   1383.78 o
   3   2  -2   7805.33   7958.36    267.55 o
   3   2   3   4648.81   4756.61    255.95 o
   3   2  -3   4881.40   5095.31    233.17 o
   3   2   4  38842.40  41732.00   1416.26 o
   3   2  -4  41171.80  42861.00   1432.40 o
   3   2   5  36359.80  35427.90   2223.99 o
   3   2  -5  36154.90  37548.50   1267.91 o
   3   2   6   3205.10   3259.43    380.31 o
   3   2  -6   2874.18   3217.71    280.01 o
   3   2   7  11403.70  10869.30    614.94 o
   3   2  -7  13687.10  13342.10    500.72 o
   3   2   8  21186.00  20978.90    905.73 o
   3   2  -8  19492.60  18174.80    722.12 o
   3   2   9    944.33    672.50    189.28 o
   3   2  -9    688.61    962.12    150.52 o
   3   2  10  10613.30  12452.30    610.29 o
   3   2 -10  10893.20  10596.80    575.80 o
   3   2  11  18074.10  17772.20    710.12 o
   3   2 -11  17807.60  17666.70    841.42 o
   3   2  12   4248.14   4810.60    399.56 o
   3   2 -12   4228.05   4906.33    383.14 o
   3   2  13   8347.41   8154.71    513.79 o
   3   2 -13   8053.04   7817.23    480.87 o
   3   2  14  10994.70  11292.60    635.52 o
   3   2 -14  11097.10  11032.50    609.00 o
   3   2  15   3514.30   4026.43    395.05 o
   3   2 -15   4138.82   4424.04    386.94 o
   3   2  16   2935.36   3859.53    386.76 o
   3   2 -16   2526.39   3171.07    340.90 o
   3   2  17  13516.90  12875.70    743.02 o
   3   2 -17  13572.60  13529.80    726.71 o
   3   2  18   6046.06   5971.53    520.56 o
   3   2 -18   7411.58   7560.75    523.44 o
   3   2  19   2214.22   2197.91    347.32 o
   3   2 -19   2468.85   2804.14    353.98 o
   3   2  20   6525.85   7863.87    642.63 o
   3   2 -20   8271.41   9894.87    626.80 o
   3   2  21   2881.96   3172.30    408.07 o
   3   2 -21   3037.71   4163.87    433.04 o
   3   2  22    710.14    931.44    284.53 o
   3   2 -22    896.35    587.83    261.61 <
   3   2  23   5384.01   6717.67    572.90 o
   3   2 -23   5707.04   6270.97    561.66 o
   3   2  24   2366.83   2369.71    382.88 o
   3   2 -24   1691.86   2406.53    386.73 o
   3   2  25    392.07    689.68    304.19 <
   3   2 -25    353.35    425.84    283.45 <
   3   3   0   8188.44   8333.88    366.05 o
   3   3   1   4018.16   4125.83    236.35 o
   3   3  -1   4110.90   4145.46    181.41 o
   3   3   2  26086.70  25374.70    922.00 o
   3   3  -2  26386.70  26424.00    712.63 o
   3   3   3   5823.81   5896.67    280.62 o
   3   3  -3   4878.99   5176.31    282.06 o
   3   3   4  39247.30  41019.00   2396.12 o
   3   3  -4  38360.80  39694.90   1367.97 o
   3   3   5  27990.90  27992.30   1769.61 o
   3   3  -5  29575.00  28859.90   1020.34 o
   3   3   6    614.61    537.51    175.55 o
   3   3  -6    179.62    289.62    165.63 <
   3   3   7  14268.70  14037.90    676.24 o
   3   3  -7  13768.30  12713.70    680.38 o
   3   3   8  10938.60  10645.90    579.46 o
   3   3  -8  11129.00  10374.70    578.04 o
   3   3   9  12397.20  12125.90    633.40 o
   3   3  -9  11571.50  11010.40    618.77 o
   3   3  10   6268.47   6272.19    673.72 o
   3   3 -10   5595.48   7098.10    345.87 o
   3   3  11  19520.90  19168.80   1298.54 o
   3   3 -11  18471.00  17658.10    891.63 o
   3   3  12   8538.61   9454.31    793.64 o
   3   3 -12   8315.01   7660.15    475.37 o
   3   3  13   6420.97   7534.98    806.09 o
   3   3 -13   5720.99   6160.52    440.19 o
   3   3  14  23136.70  23142.40   1553.61 o
   3   3 -14  21454.20  20796.00   1023.41 o
   3   3  15   1886.26   2207.72    309.90 o
   3   3 -15   1354.89   1710.71    265.73 o
   3   3  16   6648.03   6639.12    511.77 o
   3   3 -16   7456.31   7144.73    501.90 o
   3   3  17   8586.96   9062.83    615.45 o
   3   3 -17   8699.37   8905.75    568.56 o
   3   3  18   2357.35   2482.62    345.83 o
   3   3 -18   2691.49   3108.48    354.96 o
   3   3  19   1531.36   1909.52    320.96 o
   3   3 -19   1604.52   1284.87    293.70 o
   3   3  20   9816.70  10271.60    668.21 o
   3   3 -20  10354.90  10441.00    642.68 o
   3   3  21   4399.97   5218.03    513.32 o
   3   3 -21   4422.78   4798.33    466.56 o
   3   3  22    787.09    806.27    308.01 <
   3   3 -22    635.63    373.07    255.38 <
   3   3  23   2938.06   2624.97    396.96 o
   3   3 -23   2813.11   3448.42    419.62 o
   3   3  24   2111.42   2702.28    410.15 o
   3   3 -24   2154.33   2423.71    375.08 o
   3   3  25    777.66    605.01    441.86 <
   3   3 -25    742.16   1174.43    515.19 <
   3   4   0   6776.20   6718.89    274.04 o
   3   4   1  20442.00  20086.70    889.42 o
   3   4  -1  17502.40  19581.10    607.65 o
   3   4   2  12737.30  12843.80    488.91 o
   3   4  -2  12095.10  11606.80    490.33 o
   3   4   3   7186.64   7115.28    442.10 o
   3   4  -3   7999.85   8483.60    362.76 o
   3   4   4  11499.70  11070.50    831.13 o
   3   4  -4  12059.90  11664.50    477.54 o
   3   4   5  16841.00  16518.00   1037.13 o
   3   4  -5  14428.20  13934.80    724.16 o
   3   4   6   6517.15   7037.96    447.03 o
   3   4  -6   6852.63   7188.91    455.12 o
   3   4   7   8104.99   7271.13    473.57 o
   3   4  -7   8764.14   8088.44    490.26 o
   3   4   8  24273.20  24389.30   1124.67 o
   3   4  -8  25165.50  23985.50   1118.72 o
   3   4   9   2165.92   2407.76    466.01 o
   3   4  -9   2934.39   3620.23    323.29 o
   3   4  10  10259.40   8841.94    836.26 o
   3   4 -10  10843.40  10130.50    581.41 o
   3   4  11  11544.40  11097.50    957.39 o
   3   4 -11  12982.30  11918.50    661.83 o
   3   4  12   3271.27   2751.37    513.76 o
   3   4 -12   3095.26   2493.66    308.20 o
   3   4  13   5141.10   5330.94    656.14 o
   3   4 -13   3549.49   3217.71    361.61 o
   3   4  14   6751.24   6987.65    820.46 o
   3   4 -14   7033.96   6970.47    515.65 o
   3   4  15   4138.93   3676.68    591.08 o
   3   4 -15   2930.27   1796.61    442.05 o
   3   4  16   3400.41   2573.43    587.67 o
   3   4 -16   3189.03   2487.52    547.03 o
   3   4  17   9075.11   8806.35   1038.82 o
   3   4 -17   9804.50  10789.50    966.65 o
   3   4  18   3088.28   2271.54    581.42 o
   3   4 -18   3283.22   3125.67    355.04 o
   3   4  19   3287.76   3145.30    633.42 o
   3   4 -19   3757.71   3684.04    408.83 o
   3   4  20   6696.33   8255.34    950.15 o
   3   4 -20   6328.48   7068.64    562.12 o
   3   4  21   2750.51   2860.59    672.38 o
   3   4 -21   3217.19   3556.41    418.96 o
   3   4  22    519.61    416.02    482.31 <
   3   4 -22    749.39   1065.21    487.03 <
   3   4  23   3006.48   2556.25    670.53 o
   3   4 -23   3050.87   3720.86    701.07 o
   3   4  24   2774.62   3455.78    722.01 o
   3   4 -24   2937.22   2782.05    676.36 o
   3   4  25   1520.90   1000.16    514.51 <
   3   4 -25   1355.98   1119.20    530.29 <
   3   5   0   1870.13   1860.43    164.47 o
   3   5   1  13673.40  13452.50    524.31 o
   3   5  -1  12117.30  12744.40    444.46 o
   3   5   2  11451.30  10625.10    441.13 o
   3   5  -2  10417.30   9600.35    537.84 o
   3   5   3   4268.57   4572.53    471.70 o
   3   5  -3   4462.44   4466.99    335.01 o
   3   5   4  22836.30  22469.90   1377.29 o
   3   5  -4  20219.30  20540.80    780.71 o
   3   5   5  19210.60  18320.80    861.72 o
   3   5  -5  17903.20  17301.00    854.97 o
   3   5   6   3424.37   3349.02    308.25 o
   3   5  -6   3002.99   2553.79    300.52 o
   3   5   7  11616.90  10973.60    878.41 o
   3   5  -7  11879.40  11194.50    627.97 o
   3   5   8  12899.70  11506.20    961.85 o
   3   5  -8  13471.70  12499.00    677.43 o
   3   5   9   3843.99   4012.93    574.02 o
   3   5  -9   4555.02   5031.50    407.14 o
   3   5  10   7763.44   6375.28    748.30 o
   3   5 -10   7593.42   7741.15    512.38 o
   3   5  11   7080.57   6688.21    788.76 o
   3   5 -11   7659.75   7433.12    533.45 o
   3   5  12   8883.58   6921.38    798.97 o
   3   5 -12   8341.23   7519.02    554.10 o
   3   5  13   6817.98   6313.92    799.99 o
   3   5 -13   7225.33   7061.28    539.32 o
   3   5  14  11016.50  11830.20   1032.10 o
   3   5 -14  10176.30  10466.70    670.08 o
   3   5  15   2239.71   2051.87    545.07 o
   3   5 -15   1701.23   1802.75    492.01 o
   3   5  16   2845.62   3211.57    661.00 o
   3   5 -16   3949.70   4773.79    663.65 o
   3   5  17   7184.21   8600.18    971.24 o
   3   5 -17   7172.27   8031.99    916.01 o
   3   5  18   2220.87   2540.29    589.93 o
   3   5 -18   2113.83   1464.04    491.47 <
   3   5  19   1722.39   3299.93    652.31 o
   3   5 -19   1635.24   1653.03    519.09 o
   3   5  20   4108.73   3934.39    756.20 o
   3   5 -20   4549.81   6062.34    842.88 o
   3   5  21   3286.48   2616.38    670.80 o
   3   5 -21   3327.32   4165.10    770.78 o
   3   5  22   2498.51   1714.39    610.59 <
   3   5 -22   2240.66   1554.86    589.61 <
   3   5  23   4100.64   4335.68    788.75 o
   3   5 -23   3856.91   3774.85    765.88 o
   3   5  24   3082.68   3918.43    762.25 o
   3   5 -24   3332.34   4168.78    769.55 o
   3   6   0  12927.80  15721.60    505.10 o
   3   6   1  15604.60  15190.20    510.16 o
   3   6  -1  15377.90  15077.30    516.55 o
   3   6   2  20446.00  19038.70    721.98 o
   3   6  -2  19188.10  18664.40    879.21 o
   3   6   3   9594.62  10670.50    779.16 o
   3   6  -3   9129.96   9762.34    553.01 o
   3   6   4   7419.42   5917.53    593.40 o
   3   6  -4   6527.07   6097.93    422.62 o
   3   6   5  18612.40  19323.40    867.15 o
   3   6  -5  15379.40  16075.00    850.68 o
   3   6   6   4742.76   5236.44    596.53 o
   3   6  -6   5113.51   5620.55    430.26 o
   3   6   7  12230.30  11168.70    950.83 o
   3   6  -7  12556.30  12397.10    674.51 o
   3   6   8   8028.59   8045.49    774.31 o
   3   6  -8   8833.23   8379.29    544.32 o
   3   6   9   9644.00   8122.80    836.23 o
   3   6  -9  10011.60   8180.48    555.12 o
   3   6  10   5370.43   4768.88    646.74 o
   3   6 -10   5531.70   5334.62    457.14 o
   3   6  11   9016.74  10304.80    986.91 o
   3   6 -11  10300.60  11685.40    682.41 o
   3   6  12   2517.47   2358.67    531.57 o
   3   6 -12   2491.16   2278.90    345.23 o
   3   6  13   6648.92   6872.29    814.36 o
   3   6 -13   7232.10   6358.10    548.93 o
   3   6  14   6592.20   6297.96    879.24 o
   3   6 -14   8176.60   8997.79    625.28 o
   3   6  15   2777.29   1978.24    534.72 o
   3   6 -15   2672.29   1473.86    477.41 o
   3   6  16   3769.52   3578.50    703.45 o
   3   6 -16   4099.81   5339.53    739.03 o
   3   6  17   5277.76   6896.84    881.70 o
   3   6 -17   4839.90   5111.27    810.73 o
   3   6  18   3981.22   3853.39    713.19 o
   3   6 -18   3821.36   2523.11    622.61 o
   3   6  19    821.12    466.33    449.28 <
   3   6 -19    930.39   1197.74    502.99 <
   3   6  20   3982.69   3069.21    693.32 o
   3   6 -20   3205.48   3017.67    665.37 o
   3   6  21   3188.52   4123.38    789.11 o
   3   6 -21   3168.89   3782.22    730.61 o
   3   6  22   1655.23   1666.53    638.13 <
   3   6 -22   1233.18   1138.84    553.52 <
   3   6  23   4244.04   3134.26    794.08 o
   3   6 -23   4320.11   5128.45    905.74 o
   3   6  24   1819.94   1867.79    633.20 <
   3   6 -24   2054.17   2186.86    640.48 o
   3   7   0  11767.70  11774.90    428.24 o
   3   7   1  12688.20  12782.50    525.86 o
   3   7  -1  12454.70  12054.70    632.84 o
   3   7   2   8525.60   8209.93    472.73 o
   3   7  -2   7799.47   7505.52    476.18 o
   3   7   3   8441.15   8484.83    500.50 o
   3   7  -3   8949.59   9497.26    534.97 o
   3   7   4   5269.48   5129.67    405.45 o
   3   7  -4   4735.08   4392.13    387.63 o
   3   7   5   7183.50   7493.25    712.14 o
   3   7  -5   6651.50   7209.77    494.91 o
   3   7   6   3652.17   3461.92    499.83 o
   3   7  -6   2612.40   2066.60    299.30 o
   3   7   7   7413.12   7186.45    762.66 o
   3   7  -7   7254.78   7017.10    522.42 o
   3   7   8  19619.00  20057.30   1388.74 o
   3   7  -8  19900.30  18404.20    967.49 o
   3   7   9   5233.07   5502.74    673.15 o
   3   7  -9   5120.89   4253.46    440.50 o
   3   7  10  10537.90  10537.90    963.35 o
   3   7 -10  10462.20   9595.44    663.68 o
   3   7  11   8944.61   8760.95    946.62 o
   3   7 -11   9249.41   9022.34    635.33 o
   3   7  12   5511.77   4306.23    722.46 o
   3   7 -12   7478.52   6823.20    548.35 o
   3   7  13   5479.74   5636.51    801.07 o
   3   7 -13   5882.98   6825.66    559.14 o
   3   7  14   4597.96   6000.98    772.91 o
   3   7 -14   4002.10   2957.54    608.97 o
   3   7  15   6420.04   7309.17    914.90 o
   3   7 -15   6838.32   7041.64    900.34 o
   3   7  16   2103.41   2115.68    616.04 o
   3   7 -16   1688.28   1675.12    546.11 o
   3   7  17   3320.00   3040.99    660.58 o
   3   7 -17   2729.00   2649.51    641.91 o
   3   7  18   2678.90   3209.11    711.17 o
   3   7 -18   2173.15   2613.93    645.05 o
   3   7  19   3080.47   3723.31    730.59 o
   3   7 -19   2620.18   2973.49    668.42 o
   3   7  20   3098.63   2315.72    652.47 o
   3   7 -20   3414.78   4884.24    826.28 o
   3   7  21   1708.72   2148.82    623.04 o
   3   7 -21   1554.18   1030.84    540.28 <
   3   7  22   2077.50   1691.07    688.73 <
   3   7 -22   2065.01   3210.34    730.23 o
   3   7  23   2023.58   1376.91    615.27 <
   3   7 -23   2025.20   2634.79    717.36 o
   3   8   0  10289.20  10518.30    365.19 o
   3   8   1  12118.90  12686.70    448.64 o
   3   8  -1  11077.80  11001.80    517.08 o
   3   8   2  10439.80   9569.67    579.52 o
   3   8  -2  11268.10  11605.60    513.41 o
   3   8   3   7518.75   7800.05    482.32 o
   3   8  -3   6624.44   6052.53    475.70 o
   3   8   4  11608.60  11144.20    974.60 o
   3   8  -4  12952.50  13565.40    703.77 o
   3   8   5   5990.31   5118.63    649.90 o
   3   8  -5   6204.56   6246.42    476.01 o
   3   8   6   8546.70   8106.85    822.17 o
   3   8  -6   7956.37   7899.45    575.76 o
   3   8   7   4311.86   4987.32    682.29 o
   3   8  -7   5823.02   5967.85    489.18 o
   3   8   8   1985.20   2033.46    487.14 o
   3   8  -8   1242.32    964.58    303.38 o
   3   8   9   7292.14   6652.62    781.99 o
   3   8  -9   7157.30   5773.95    523.52 o
   3   8  10   6316.97   6097.93    793.22 o
   3   8 -10   6342.87   6868.61    569.00 o
   3   8  11   7206.45   8537.60    923.43 o
   3   8 -11   7598.46   7277.27    607.28 o
   3   8  12   5453.90   4291.50    710.14 o
   3   8 -12   5806.40   5025.36    515.11 o
   3   8  13   9800.47   8835.80    987.83 o
   3   8 -13   9469.80   8200.12    669.52 o
   3   8  14   6124.89   4762.74    759.68 o
   3   8 -14   6098.23   6693.12    851.69 o
   3   8  15   1739.67   1617.44    557.24 <
   3   8 -15   1666.15   1093.43    494.96 <
   3   8  16   2911.20   2998.04    693.27 o
   3   8 -16   3114.68   3357.61    677.10 o
   3   8  17   2553.26   2288.72    634.72 o
   3   8 -17   2334.89   1765.93    587.10 o
   3   8  18   2414.46   1549.95    583.64 <
   3   8 -18   2351.47   1467.73    564.02 <
   3   8  19   1330.34    963.35    564.70 <
   3   8 -19   1058.78    607.46    568.35 <
   3   8  20   2163.96   1757.34    633.56 <
   3   8 -20   2442.22   2411.44    645.53 o
   3   8  21   2787.62   2207.72    706.16 o
   3   8 -21   2700.56   2438.44    667.86 o
   3   8  22   2580.61   1700.89    723.47 <
   3   8 -22   2412.82   2352.53    675.01 o
   3   9   0   8119.38   8327.75    326.26 o
   3   9   1   9561.69   9488.67    357.63 o
   3   9  -1   8969.35   9446.95    563.64 o
   3   9   2   5537.90   6003.44    443.84 o
   3   9  -2   6014.32   5892.99    455.71 o
   3   9   3  11332.10  10287.60    614.75 o
   3   9  -3  12895.80  10984.60    644.94 o
   3   9   4   6568.83   6716.44    476.83 o
   3   9  -4   5708.37   6310.24    493.80 o
   3   9   5   1776.54   1639.53    459.11 o
   3   9  -5   2309.38   2756.28    351.32 o
   3   9   6   5563.84   4568.85    653.63 o
   3   9  -6   4899.43   4244.87    432.55 o
   3   9   7   4070.94   4571.30    663.03 o
   3   9  -7   4393.32   4263.28    456.84 o
   3   9   8   5412.73   4626.52    689.94 o
   3   9  -8   4919.00   4442.45    478.60 o
   3   9   9   7901.45   7584.06    872.05 o
   3   9  -9   6888.22   6570.40    587.56 o
   3   9  10   3914.48   4397.04    685.21 o
   3   9 -10   4272.40   3546.59    459.34 o
   3   9  11   4591.25   4400.72    692.47 o
   3   9 -11   4320.74   3658.27    464.13 o
   3   9  12   4552.89   4146.69    745.53 o
   3   9 -12   4622.36   4297.64    496.56 o
   3   9  13   2430.61   2688.78    631.72 o
   3   9 -13   2168.98   1925.47    380.77 o
   3   9  14   1666.15   1665.30    574.33 <
   3   9 -14   1320.29   1459.13    547.23 <
   3   9  15   5350.94   5376.34    830.77 o
   3   9 -15   5713.38   5472.06    836.15 o
   3   9  16   4331.02   3228.75    696.11 o
   3   9 -16   4072.57   3649.68    735.67 o
   3   9  17   1225.95   1364.64    602.47 <
   3   9 -17   1157.74   1403.91    586.45 <
   3   9  18   3024.61   2702.28    681.45 o
   3   9 -18   2955.60   2513.30    684.01 o
   3   9  19   3269.68   3025.04    707.15 o
   3   9 -19   2859.71   3168.62    759.30 o
   3   9  20    941.50    249.12    545.04 <
   3   9 -20   1009.32   1000.16    622.19 <
   3   9  21   1646.06   2001.56    683.29 <
   3   9 -21   1792.43   1459.13    610.15 <
   3   9  22    828.88    840.63    638.14 <
   3   9 -22    912.89   1133.93    614.72 <
   3  10   0   7801.23   7480.98    356.48 o
   3  10   1   5255.48   6068.48    468.57 o
   3  10  -1   5264.82   6189.97    458.27 o
   3  10   2   5326.12   5501.52    453.50 o
   3  10  -2   6154.14   5792.36    446.75 o
   3  10   3  11021.90  10412.70    650.61 o
   3  10  -3  11830.40  11847.30    676.10 o
   3  10   4   3920.64   5053.59    665.47 o
   3  10  -4   5276.31   4810.60    444.41 o
   3  10   5   2954.94   3049.58    550.87 o
   3  10  -5   2899.70   3005.40    390.03 o
   3  10   6   6010.82   5996.07    738.80 o
   3  10  -6   5698.20   5758.00    529.98 o
   3  10   7   1930.04   2593.06    547.79 o
   3  10  -7   2063.50   2035.92    363.29 o
   3  10   8   2773.04   1735.25    554.51 o
   3  10  -8   3215.43   3496.28    451.04 o
   3  10   9   3088.09   3285.20    656.29 o
   3  10  -9   3037.01   3307.29    448.64 o
   3  10  10   5512.71   5140.72    777.49 o
   3  10 -10   4688.29   4289.05    508.98 o
   3  10  11   1539.41   1691.07    560.71 o
   3  10 -11   1537.86   1316.78    372.06 o
   3  10  12   3526.38   3479.10    716.74 o
   3  10 -12   3664.74   3766.26    494.36 o
   3  10  13   4394.15   3915.98    732.12 o
   3  10 -13   3864.49   3312.20    699.01 o
   3  10  14   2406.30   2763.64    650.03 o
   3  10 -14   2418.39   1986.83    620.13 o
   3  10  15   3495.74   2669.15    696.75 o
   3  10 -15   3354.08   3182.12    676.40 o
   3  10  16   1824.97   2552.57    702.54 o
   3  10 -16   2570.65   2626.20    709.26 o
   3  10  17   1991.98   1629.71    634.73 <
   3  10 -17   2176.20   1876.38    635.94 <
   3  10  18   1201.19    638.14    531.61 <
   3  10 -18    826.96   1265.24    603.56 <
   3  10  19   2221.75   2730.51    755.49 o
   3  10 -19   2517.42   1281.19    670.88 <
   3  10  20   1135.61   1547.49    680.87 <
   3  10 -20   1427.18   1259.10    678.73 <
   3  10  21   1594.12   1665.30    656.50 <
   3  10 -21   1773.07   1686.17    682.38 <
   3  11   0   5912.16   5910.17    330.12 o
   3  11   1   4352.53   3611.63    414.18 o
   3  11  -1   4704.89   4873.19    336.84 o
   3  11   2   6449.81   6318.83    506.04 o
   3  11  -2   6219.98   6150.70    395.45 o
   3  11   3   6290.07   6355.64    518.89 o
   3  11  -3   7564.57   7242.90    549.70 o
   3  11   4   5270.44   5989.94    504.65 o
   3  11  -4   6255.02   6862.47    546.59 o
   3  11   5   1945.88   1675.12    497.27 o
   3  11  -5   1644.65   1774.52    359.40 o
   3  11   6   6157.87   6299.19    776.51 o
   3  11  -6   5994.42   5878.26    543.98 o
   3  11   7   5935.88   6662.44    824.40 o
   3  11  -7   5879.65   6329.87    576.72 o
   3  11   8    642.69   1001.39    523.85 <
   3  11  -8    717.87    862.72    352.12 <
   3  11   9   4672.31   4428.95    753.89 o
   3  11  -9   4688.52   4730.84    531.28 o
   3  11  10   3342.22   3425.10    677.30 o
   3  11 -10   2672.15   2526.79    455.51 o
   3  11  11   1875.38   2408.98    641.33 o
   3  11 -11   1857.76   1293.46    384.69 o
   3  11  12   4100.66   3599.36    735.77 o
   3  11 -12   3241.44   3229.98    487.22 o
   3  11  13   3972.21   2986.99    726.47 o
   3  11 -13   3744.23   4021.52    743.29 o
   3  11  14   2322.37   2694.92    689.31 o
   3  11 -14   2125.08   2207.72    671.20 o
   3  11  15   3365.12   3079.03    744.01 o
   3  11 -15   3714.70   2996.81    712.64 o
   3  11  16   3058.76   2552.57    749.08 o
   3  11 -16   3570.29   4749.24    839.00 o
   3  11  17     92.68   -479.83    538.66 <
   3  11 -17     38.73   -456.52    472.39 <
   3  11  18   1823.49   2186.86    718.86 o
   3  11 -18   2224.15   2642.15    743.30 o
   3  11  19   2566.22   1097.11    647.69 <
   3  11 -19   2853.52   2442.12    748.97 o
   3  12   0  12382.80  12869.60    515.92 o
   3  12   1   2032.79   1693.53    330.61 o
   3  12  -1   2423.70   2752.60    282.66 o
   3  12   2   4306.98   4793.42    460.12 o
   3  12  -2   4422.76   5276.94    374.96 o
   3  12   3   4817.76   4768.88    462.79 o
   3  12  -3   4771.91   5052.36    375.76 o
   3  12   4   1311.72   1478.77    320.10 o
   3  12  -4   1550.82   1559.76    274.88 o
   3  12   5   2142.76   1773.30    529.27 o
   3  12  -5   2376.13   2299.76    395.28 o
   3  12   6   4810.26   4844.97    743.62 o
   3  12  -6   4564.90   4921.05    531.75 o
   3  12   7   4114.12   4597.07    739.23 o
   3  12  -7   3539.01   3657.04    483.28 o
   3  12   8   1216.82   1187.92    574.34 <
   3  12  -8   1349.47   1100.79    381.86 <
   3  12   9   5133.37   5602.15    844.73 o
   3  12  -9   5263.76   5062.18    576.03 o
   3  12  10   3486.84   3274.16    731.67 o
   3  12 -10   3236.76   3146.53    495.94 o
   3  12  11    502.26    886.03    569.28 <
   3  12 -11    438.59    660.23    379.11 <
   3  12  12   3340.42   3066.76    708.42 o
   3  12 -12   3626.83   3315.88    717.08 o
   3  12  13   1666.65   1153.56    635.97 <
   3  12 -13   1574.91    888.49    579.59 <
   3  12  14    523.13    283.48    595.23 <
   3  12 -14    556.79    300.66    563.33 <
   3  12  15   2815.85   2802.91    758.42 o
   3  12 -15   2879.59   3692.63    775.86 o
   3  12  16   2592.30   2244.54    715.76 o
   3  12 -16   3087.39   2805.37    757.47 o
   3  12  17    668.00    335.02    597.71 <
   3  12 -17    636.40   1325.37    650.10 <
   3  12  18   2966.35   2417.57    727.02 o
   3  12 -18   2731.16   2558.70    768.38 o
   3  13   0   1277.93   1484.91    344.61 o
   3  13   1   1841.28   1416.18    345.35 o
   3  13  -1   1642.56   1781.89    239.03 o
   3  13   2   1602.43   1548.72    343.68 o
   3  13  -2   1305.80   1185.47    259.09 o
   3  13   3   7326.98   7341.08    604.96 o
   3  13  -3   8063.90   8573.18    488.55 o
   3  13   4   1160.23   1038.21    320.41 o
   3  13  -4   1178.88    660.23    258.16 <
   3  13   5   1195.42   1530.31    353.07 o
   3  13  -5    902.85   1237.01    267.15 o
   3  13   6   8975.63   9385.59   1032.32 o
   3  13  -6   8925.75   9200.28    533.81 o
   3  13   7   1753.71   2069.05    610.87 o
   3  13  -7   1752.19   1856.75    301.72 o
   3  13   8    367.93    796.45    552.10 <
   3  13  -8    305.21    428.29    352.17 <
   3  13   9   4092.87   3870.57    768.53 o
   3  13  -9   3991.37   4551.67    547.37 o
   3  13  10   3451.50   3250.84    704.66 o
   3  13 -10   2927.87   2369.71    480.62 o
   3  13  11    768.70    790.31    558.37 <
   3  13 -11    980.39   1429.68    615.80 <
   3  13  12   1680.77   1167.06    622.48 <
   3  13 -12   1635.99   2200.36    672.05 o
   3  13  13   2807.68   2703.51    735.19 o
   3  13 -13   2800.69   2924.41    706.73 o
   3  13  14    528.38   1032.07    635.50 <
   3  13 -14    732.79   1214.92    631.79 <
   3  13  15   3026.37   3301.15    805.97 o
   3  13 -15   3233.46   4502.58    878.33 o
   3  13  16   1874.41   2118.14    741.05 <
   3  13 -16   1733.00   2216.31    743.32 <
   3  13 -17     35.65   -714.23    556.98 <
   3  14   0   3508.86   3017.67    432.94 o
   3  14   1    975.78    628.32    324.19 <
   3  14  -1    986.19   1278.74    262.27 o
   3  14   2   1619.73   1756.12    375.36 o
   3  14  -2   1743.25   1965.97    288.00 o
   3  14   3   3671.00   4351.63    484.43 o
   3  14  -3   3172.96   3717.17    359.37 o
   3  14   4   1023.42    955.98    346.12 <
   3  14  -4   1084.30   1130.25    271.16 o
   3  14   5   1230.34   1418.64    376.57 o
   3  14  -5   1321.96   1221.06    279.92 o
   3  14   6   4075.24   3463.14    733.45 o
   3  14  -6   4152.67   4944.37    422.28 o
   3  14   7   3485.21   4556.57    790.02 o
   3  14  -7   3320.84   4578.66    549.71 o
   3  14   8    364.50    549.78    548.51 <
   3  14  -8    275.09     22.09    348.54 <
   3  14   9   2932.12   2867.95    704.48 o
   3  14  -9   2760.96   3187.03    517.21 o
   3  14  10   1729.78    946.17    588.26 <
   3  14 -10   1644.11   1639.53    595.19 <
   3  14  11     17.64   -385.34    472.41 <
   3  14 -11     46.75    654.09    550.88 <
   3  14  12   2662.42   2444.57    699.71 o
   3  14 -12   2655.14   2503.48    694.74 o
   3  14  13    609.38    955.98    631.88 <
   3  14 -13    771.80    947.39    623.35 <
   3  14  14    171.67    185.31    613.60 <
   3  14 -14    224.19     57.68    574.34 <
   3  14  15   2138.88   2971.04    823.95 o
   3  14 -15   2134.75   2334.12    738.61 o
   3  15   0   2732.27   3757.67    469.26 o
   3  15   1    935.14   1645.67    384.65 o
   3  15  -1    821.95    746.14    347.34 <
   3  15   2   1280.09   1376.91    392.61 o
   3  15  -2   1149.43   1025.93    240.68 o
   3  15   3   3155.20   4381.09    503.03 o
   3  15  -3   2543.88   2525.57    335.06 o
   3  15   4   1033.43   1051.71    386.55 <
   3  15  -4    854.91    818.54    277.38 <
   3  15   5    361.44    460.20    349.72 <
   3  15  -5    415.87    646.73    369.29 <
   3  15   6   4238.80   4906.33    542.11 o
   3  15  -6   3769.85   4372.50    560.86 o
   3  15   7   1767.86   1141.29    555.10 <
   3  15  -7   1892.79   2613.93    485.03 o
   3  15   8    250.33   -267.53    476.12 <
   3  15  -8    123.10    535.06    476.06 <
   3  15   9   2929.28   2447.03    670.55 o
   3  15  -9   2914.36   3707.36    731.64 o
   3  15  10   1317.97    704.41    573.36 <
   3  15 -10   1465.68   1320.46    565.83 <
   3  15  11    175.05   -369.39    514.14 <
   3  15 -11    129.33     36.82    541.20 <
   3  15  12   1056.98   1374.46    678.48 <
   3  15 -12   1403.73   1486.13    651.59 <
   3  16   0   1986.27   1931.60    422.22 o
   3  16   1    188.25    320.30    355.86 <
   3  16  -1    242.88     -1.23    342.40 <
   3  16   2    242.44    677.41    364.31 <
   3  16  -2    176.39    336.25    341.12 <
   3  16   3   2756.92   3153.89    482.85 o
   3  16  -3   2560.53   3036.08    503.65 o
   3  16   4   1728.98   1749.98    411.09 o
   3  16  -4   1521.03   2077.64    442.38 o
   3  16   5    559.87    714.23    369.31 <
   3  16  -5    492.44    905.67    381.44 <
   3  16   6   3233.37   3958.93    510.33 o
   3  16  -6   3075.02   3393.19    672.09 o
   3  16   7   1715.75   2196.68    625.45 o
   3  16  -7   1742.47   1846.93    558.28 o
   3  16   8    681.90    878.67    560.75 <
   3  16  -8    699.16    343.61    490.97 <
   3  16   9   1604.82   2093.59    656.17 o
   3  16  -9   1568.53   1102.02    559.88 <
   3  17   0   1575.87   2362.35    459.24 o
   3  17   1    644.49    863.95    392.58 <
   3  17  -1    694.36   2021.19    663.07 o
   3  17   2    505.83    591.51    359.53 <
   3  17  -2    447.24    276.12    627.12 <
   3  17   3   1934.56   1518.04    411.56 o
   3  17  -3   2001.20   1927.92    601.39 o
   3  17   4    386.63    -33.13    463.90 <
   4   0   0  33546.60  43416.90   1767.28 o
   4   0   1   3362.03   3749.08    204.35 o
   4   0   2   8752.27   8800.21    342.06 o
   4   0   3    964.44    735.09    123.12 o
   4   0   4  17230.10  16486.10    637.24 o
   4   0   5    477.44   1309.42    155.62 o
   4   0   6  37155.30  35810.80   1260.87 o
   4   0   7    347.14    395.16    133.73 <
   4   0   8    687.38    796.45    129.91 o
   4   0   9     75.60    390.25    129.90 <
   4   0  10  14409.00  15173.00    601.20 o
   4   0  11    380.55    272.44    182.90 <
   4   0  12  25210.70  23434.50   1103.79 o
   4   0  13     66.58   -260.17    170.50 <
   4   0  14    512.58    686.00    234.27 <
   4   0  15    270.55   1533.99    269.82 o
   4   0  16  13518.10  13342.10    740.85 o
   4   0  17    303.18    512.97    229.38 <
   4   0  18  14776.70  14330.00    802.28 o
   4   0  19      1.74    134.99    213.52 <
   4   0  20   4551.37   4908.78    483.80 o
   4   0  21      8.83    211.08    242.95 <
   4   0  22  12616.20  11463.20    735.15 o
   4   0  23    133.27    220.90    250.33 <
   4   0  24   3170.35   4098.83    466.78 o
   4   0  25    283.25    965.80    318.65 o
   4   1   0   1196.33   1440.73    140.50 o
   4   1   1   6290.98   5848.81    290.83 o
   4   1  -1   9418.16   9072.65    359.48 o
   4   1   2    779.89    725.27    125.26 o
   4   1  -2    872.34    818.54    121.59 o
   4   1   3  59475.50  62508.40   2101.97 o
   4   1  -3  60487.00  63297.50   1816.47 o
   4   1   4   1770.70   1740.16    170.66 o
   4   1  -4   1559.35   1494.72    143.76 o
   4   1   5   2125.65   2313.26    203.16 o
   4   1  -5   3254.20   3784.67    229.73 o
   4   1   6   4213.44   4316.04    256.03 o
   4   1  -6   4029.66   4593.39    232.79 o
   4   1   7  43252.10  41962.70   1726.54 o
   4   1  -7  41909.60  39406.50   1424.13 o
   4   1   8    213.28    278.57    206.15 <
   4   1  -8    169.40    164.44    126.40 <
   4   1   9  39934.80  37269.90   1643.84 o
   4   1  -9  39613.60  38099.50   1160.93 o
   4   1 -10   1684.85   2204.04    202.33 o
   4   1  11   3029.62   3247.16    334.47 o
   4   1 -11   3151.21   3472.96    251.66 o
   4   1  12    101.70    364.48    195.02 <
   4   1 -12    161.54    -45.41    173.04 <
   4   1  13  10723.40  11054.60    631.71 o
   4   1 -13  10585.60  11141.70    618.34 o
   4   1  14    218.56    608.69    223.13 <
   4   1 -14    312.65   1267.69    233.36 o
   4   1  15  22215.40  22415.90   1105.85 o
   4   1 -15  21507.60  23225.90   1087.61 o
   4   1  16    260.70    927.76    258.45 o
   4   1 -16    218.90    538.74    215.82 <
   4   1  17     36.55    -93.27    201.25 <
   4   1 -17     22.33    122.72    208.61 <
   4   1  18     27.15    242.99    225.76 <
   4   1 -18     31.06   -258.94    187.69 <
   4   1  19  18254.20  18028.70    991.45 o
   4   1 -19  19863.40  20144.40    992.52 o
   4   1  20      5.74    355.89    251.49 <
   4   1 -20     33.47    555.92    256.28 <
   4   1  21   4257.10   4431.40    483.09 o
   4   1 -21   4494.78   4949.28    486.00 o
   4   1  22    122.25    374.29    260.09 <
   4   1 -22     87.29    164.44    249.11 <
   4   1  23    570.47    431.97    267.59 <
   4   1 -23    468.91      1.23    232.02 <
   4   1  24    108.20    305.57    265.03 <
   4   1 -24    142.16    348.52    273.61 <
   4   1  25   6232.09   8500.78    664.26 o
   4   1 -25   5888.84   6214.52    605.36 o
   4   2   0  36308.40  38524.10   1139.04 o
   4   2   1    352.22    503.15    118.89 o
   4   2  -1    145.46    126.40    104.32 <
   4   2   2  28787.10  29650.30   1010.68 o
   4   2  -2  27112.30  27905.20    873.23 o
   4   2   3   2083.23   2147.59    185.11 o
   4   2  -3   1945.08   1896.02    154.79 o
   4   2   4  10545.90  10724.50    444.33 o
   4   2  -4  10389.80  10179.60    452.88 o
   4   2   5   8740.69   9820.01    532.42 o
   4   2  -5   7868.48  10793.20    426.66 o
   4   2   6  46902.50  46606.40   1904.09 o
   4   2  -6  45316.70  44061.20   1564.40 o
   4   2   7   1390.99   1413.73    296.95 o
   4   2  -7   1908.16   1893.56    187.80 o
   4   2   8   2208.54   1915.65    248.53 o
   4   2  -8   2520.02   2314.49    211.70 o
   4   2   9    601.02    811.18    295.61 <
   4   2  -9    756.45    727.73    126.45 o
   4   2 -10  21549.20  23200.10    852.33 o
   4   2  11   6237.01   6636.67    665.33 o
   4   2 -11   5918.62   5654.91    336.23 o
   4   2  12  21819.20  19917.40   1429.63 o
   4   2 -12  22108.00  20753.10    979.79 o
   4   2  13   1494.39   1131.47    397.92 <
   4   2 -13   1417.11   1713.16    268.28 o
   4   2  14   1485.31   2100.96    458.29 o
   4   2 -14   1401.04   1643.21    263.46 o
   4   2  15    193.30   -191.44    328.87 <
   4   2 -15    216.96    103.08    200.05 <
   4   2  16  18808.80  17438.40    929.91 o
   4   2 -16  18402.30  18086.40    908.59 o
   4   2  17     27.26    119.04    228.25 <
   4   2 -17      7.68    109.22    204.93 <
   4   2  18  16240.70  16162.20    892.55 o
   4   2 -18  16538.30  17026.10    881.09 o
   4   2  19    337.96    341.16    266.30 <
   4   2 -19    284.45    530.15    249.00 <
   4   2  20    871.03    971.94    296.90 o
   4   2 -20    981.34    683.55    267.76 <
   4   2  21    870.59    716.68    300.77 <
   4   2 -21    885.05    917.94    277.32 o
   4   2  22   8405.78   9283.73    706.34 o
   4   2 -22   8580.82   8691.00    646.34 o
   4   2  23   1246.68   1244.38    336.25 o
   4   2 -23   1138.82   1102.02    315.42 o
   4   2  24   4134.91   3352.70    682.20 o
   4   2 -24   4521.86   4663.34    490.52 o
   4   2  25    204.90     35.59    400.08 <
   4   2 -25    237.65    211.08    256.49 <
   4   3   0    238.73    358.34    112.81 o
   4   3   1   9096.29   9151.19    437.80 o
   4   3  -1  10595.70  10936.80    381.54 o
   4   3   2   7087.73   8009.90    375.42 o
   4   3  -2   8184.55   8241.84    327.28 o
   4   3   3  51341.00  52571.80   1832.70 o
   4   3  -3  54525.50  55075.30   1424.04 o
   4   3   4    907.03   1265.24    152.68 o
   4   3  -4    375.74    670.05    130.97 o
   4   3   5  20510.70  21556.90    970.77 o
   4   3  -5  20939.70  21837.90    797.37 o
   4   3   6   1085.83    812.40    267.77 o
   4   3  -6   1009.34    964.58    157.15 o
   4   3   7  18068.30  16319.20   1175.02 o
   4   3  -7  17650.50  17509.60    669.81 o
   4   3   8   4073.03   3534.32    482.17 o
   4   3  -8   3860.70   4044.83    266.80 o
   4   3   9  22936.80  22808.60   1486.66 o
   4   3  -9  22884.00  21965.60    838.57 o
   4   3  10  10179.10   9737.79    865.29 o
   4   3 -10  10583.20  10399.30    466.21 o
   4   3  11    333.28    214.76    322.78 <
   4   3 -11    352.20    146.04    143.66 <
   4   3  12   1359.64   1480.00    412.23 o
   4   3 -12   1222.65   1178.11    186.61 o
   4   3  13  19555.30  18850.90   1384.41 o
   4   3 -13  19706.40  18745.40    755.09 o
   4   3  14    792.75    239.30    376.92 <
   4   3 -14    894.51    759.63    213.67 o
   4   3  15  22062.00  27989.90   1743.74 o
   4   3 -15  21045.50  23317.90   1116.84 o
   4   3  16    164.52    -58.91    342.39 <
   4   3 -16     49.55   -142.35    187.74 <
   4   3  17     48.11    185.31    397.60 <
   4   3 -17     43.86    215.99    209.82 <
   4   3  18    553.36    392.70    432.02 <
   4   3 -18    753.25    441.79    224.78 <
   4   3  19  13194.70  13334.70   1196.10 o
   4   3 -19  13298.80  13634.10    762.96 o
   4   3  20    887.96    632.01    424.73 <
   4   3 -20    921.48   1394.09    294.00 o
   4   3  21   5144.21   4345.50    775.63 o
   4   3 -21   6184.61   7238.00    569.71 o
   4   3  22    513.89    240.53    397.67 <
   4   3 -22    610.66    915.49    288.16 o
   4   3  23    332.56    484.74    461.39 <
   4   3 -23    215.34    242.99    260.16 <
   4   3  24    677.97    312.93    455.38 <
   4   3 -24    562.08   1195.29    535.97 <
   4   4   0  26122.00  26079.10    946.48 o
   4   4   1   4727.99   4856.01    290.28 o
   4   4  -1   5490.11   5597.24    264.47 o
   4   4   2  10756.40  10044.60    449.83 o
   4   4  -2  10891.40  10290.00    349.69 o
   4   4   3   1216.57   1044.34    157.40 o
   4   4  -3   1246.08   1439.50    154.17 o
   4   4   4   6511.74   6531.13    323.88 o
   4   4  -4   5857.04   5572.69    281.33 o
   4   4   5   3364.58   3412.83    293.15 o
   4   4  -5   4362.11   4285.37    269.08 o
   4   4   6  36353.50  34792.20   2264.54 o
   4   4  -6  37770.00  37184.00   1299.19 o
   4   4  -7   5092.81   5604.60    325.39 o
   4   4   8   5241.01   5506.42    597.00 o
   4   4  -8   5342.03   5278.17    419.92 o
   4   4   9    173.27    386.57    322.70 <
   4   4  -9     61.86     67.50    192.67 <
   4   4  10  12590.20  12791.10   1037.55 o
   4   4 -10  13710.50  13224.30    716.65 o
   4   4  11  10146.30  10423.80    879.03 o
   4   4 -11   9664.72   8668.91    574.82 o
   4   4  12  12299.60  13183.80   1009.43 o
   4   4 -12  10455.30  10630.00    648.43 o
   4   4  13   3276.96   3107.26    570.90 o
   4   4 -13   2620.57   2915.82    352.80 o
   4   4  14    289.38    400.07    395.13 <
   4   4 -14    361.48    447.93    251.54 <
   4   4  15   1492.43   2226.13    566.28 o
   4   4 -15   1310.73   2685.10    502.76 o
   4   4  16  15437.10  14606.10   1251.92 o
   4   4 -16  14980.90  14757.00   1187.44 o
   4   4  17    989.03    514.20    422.36 <
   4   4 -17   1290.11    970.71    438.32 <
   4   4  18  14168.70  13648.90   1190.76 o
   4   4 -18  14116.30  12270.70   1119.97 o
   4   4  19    796.76    115.36    444.39 <
   4   4 -19    763.12    514.20    386.67 <
   4   4  20    198.39    530.15    466.26 <
   4   4 -20    130.37    202.49    229.47 <
   4   4  21    112.39     49.09    425.84 <
   4   4 -21    112.22   -141.13    402.51 <
   4   4  22   6710.13   5421.75    882.18 o
   4   4 -22   6824.89   7457.66    931.36 o
   4   4  23   2166.25   2423.71    666.13 o
   4   4 -23   2350.71   2213.86    641.95 o
   4   4  24   3335.29   2917.04    720.84 o
   4   4 -24   3197.38   4404.40    794.83 o
   4   5   0     24.01    343.61    136.07 <
   4   5   1   4092.67   3696.31    247.08 o
   4   5  -1   3729.40   3307.29    208.04 o
   4   5   2  12429.00  12168.90    509.73 o
   4   5  -2  12402.00  11863.30    442.04 o
   4   5   3  32478.10  32816.40   1079.66 o
   4   5  -3  29011.60  28091.70    944.98 o
   4   5   4   5211.08   4905.10    360.70 o
   4   5  -4   5294.91   5695.41    314.73 o
   4   5   5   4554.57   4188.42    653.51 o
   4   5  -5   3801.89   3912.30    345.74 o
   4   5  -6    592.73    708.09    158.18 o
   4   5   7   8138.34   7388.94    707.80 o
   4   5  -7   8564.94   7673.65    511.77 o
   4   5   8   5195.95   4520.99    588.05 o
   4   5  -8   5157.66   5299.03    424.14 o
   4   5   9  25136.90  24286.20   1702.94 o
   4   5  -9  26428.20  25712.20   1196.98 o
   4   5  10   2669.66   2783.28    517.72 o
   4   5 -10   2457.36   2582.02    331.09 o
   4   5  11     36.67      4.91    353.43 <
   4   5 -11    153.26     11.04    217.22 <
   4   5  12   6372.61   7040.42    778.94 o
   4   5 -12   6226.34   5221.71    469.52 o
   4   5  13  15566.10  14817.20   1219.85 o
   4   5 -13  15944.10  14515.30    823.05 o
   4   5  14   7544.85   6603.54    852.48 o
   4   5 -14   7034.75   7493.25    566.61 o
   4   5  15  11039.90  10534.20   1126.62 o
   4   5 -15  11749.00  11632.60    706.15 o
   4   5  16    218.35    -50.31    393.94 <
   4   5 -16    554.54    541.19    262.63 <
   4   5  17     31.06    531.38    441.68 <
   4   5 -17     15.14    107.99    349.74 <
   4   5  18    330.22     -4.91    414.82 <
   4   5 -18    562.73    424.61    416.06 <
   4   5  19   7137.20   7079.69    949.96 o
   4   5 -19   6292.80   6939.79    858.91 o
   4   5  20   1829.10   2833.59    680.11 o
   4   5 -20   1985.93   2217.54    580.23 o
   4   5  21   4151.91   3409.15    714.02 o
   4   5 -21   3868.60   3136.71    652.65 o
   4   5  22   1090.49   1411.27    582.73 <
   4   5 -22   1134.96   1961.06    606.85 o
   4   5  23    355.42    364.48    516.65 <
   4   5 -23    468.93    417.25    463.89 <
   4   5  24   1453.07    960.89    583.17 <
   4   5 -24   1400.51   1867.79    619.39 o
   4   6   0  20891.10  19560.30    760.44 o
   4   6   1  12847.10  12026.50    512.11 o
   4   6  -1  12624.30  11258.30    435.74 o
   4   6   2   6192.93   5630.37    330.31 o
   4   6  -2   6275.07   6126.16    288.02 o
   4   6   3    376.62    357.11    143.60 <
   4   6  -3    483.73    379.20    162.06 <
   4   6   4   7544.96   8180.48    626.17 o
   4   6  -4   7374.74   6911.56    477.98 o
   4   6  -5   3351.03   3253.29    253.14 o
   4   6   6  26898.80  27105.10   1752.81 o
   4   6  -6  25676.00  26627.70    984.82 o
   4   6   7   4012.46   3373.56    490.90 o
   4   6  -7   3149.70   2383.21    315.87 o
   4   6   8   2792.57   2796.78    505.60 o
   4   6  -8   2456.25   2567.29    323.75 o
   4   6   9     88.49    119.04    344.84 <
   4   6  -9    105.65    121.49    223.35 <
   4   6  10  11688.20  11274.20    968.33 o
   4   6 -10  10528.00  10055.60    647.49 o
   4   6  11   7561.33   8495.87    896.03 o
   4   6 -11   7689.74   7239.22    566.08 o
   4   6  12  18856.50  18619.00   1444.00 o
   4   6 -12  19516.80  18988.40   1006.53 o
   4   6  13    340.12      4.91    422.18 <
   4   6 -13    924.82    841.86    295.82 <
   4   6  14    160.98    149.72    419.70 <
   4   6 -14    225.07     80.99    268.77 <
   4   6  15   3551.62   3206.66    672.96 o
   4   6 -15   3403.19   3484.01    426.89 o
   4   6  16   8263.59   8207.48   1013.78 o
   4   6 -16   8643.51   9856.83    706.23 o
   4   6  17   4113.35   3711.04    703.77 o
   4   6 -17   3888.38   3847.26    667.66 o
   4   6  18   3607.03   4470.67    773.11 o
   4   6 -18   3687.79   3639.86    673.80 o
   4   6  19   1671.02   1839.57    612.24 o
   4   6 -19   1658.44   2104.64    584.97 o
   4   6  20    334.28    169.35    472.49 <
   4   6 -20    324.34   -109.22    418.48 <
   4   6  21    155.93   -366.93    418.41 <
   4   6 -21    356.57    -62.59    454.08 <
   4   6  22   6200.34   5515.01    920.31 o
   4   6 -22   5988.82   7121.41    955.08 o
   4   6  23   3480.24   3292.56    759.85 o
   4   6 -23   3453.88   3349.02    741.35 o
   4   7   0      4.94    616.05    188.63 o
   4   7   1   8128.63   8608.77    415.88 o
   4   7  -1   8383.08   8157.17    354.83 o
   4   7   2  19314.60  18433.70    716.71 o
   4   7  -2  18839.20  17804.10    727.28 o
   4   7   3  11894.70  12421.70    816.43 o
   4   7  -3  10843.40   9055.47    579.86 o
   4   7   4   5925.29   5565.33    561.80 o
   4   7  -4   5825.61   5944.53    447.51 o
   4   7   5   1438.96   2534.16    476.05 o
   4   7  -5   1412.38   2926.86    325.90 o
   4   7   6   1365.62   1043.12    381.92 <
   4   7  -6   1521.26   1657.94    278.36 o
   4   7   7   9718.96  10007.80    881.49 o
   4   7  -7  10342.10   9958.69    627.52 o
   4   7   8   6795.18   5900.35    748.11 o
   4   7  -8   6694.02   7244.13    535.58 o
   4   7   9  24949.10  24312.00   1660.45 o
   4   7  -9  24710.00  22505.50   1161.70 o
   4   7  10   6844.12   6364.23    814.66 o
   4   7 -10   6397.28   7773.05    586.95 o
   4   7  11   5072.28   4826.56    725.72 o
   4   7 -11   4962.91   4698.93    482.99 o
   4   7  12   4942.76   4071.83    698.50 o
   4   7 -12   4643.54   4901.42    500.03 o
   4   7  13   8051.36   8094.58    977.98 o
   4   7 -13   7845.15   9035.84    674.59 o
   4   7  14   8383.00   7332.49    953.34 o
   4   7 -14   9535.01   9183.10    701.97 o
   4   7  15   4338.26   3923.34    727.12 o
   4   7 -15   4539.04   3620.23    459.84 o
   4   7  16    718.70    946.17    523.91 <
   4   7 -16    690.58   1480.00    553.00 <
   4   7  17    586.73    525.24    519.12 <
   4   7 -17    595.22   1044.34    516.44 <
   4   7  18    527.42    595.19    541.17 <
   4   7 -18    321.50     24.54    483.54 <
   4   7  19   3850.82   2249.45    670.60 o
   4   7 -19   3929.56   4188.42    793.64 o
   4   7  20   4367.27   5389.84    893.09 o
   4   7 -20   4213.76   4978.73    868.97 o
   4   7  21   3758.28   3437.37    747.77 o
   4   7 -21   3835.05   4846.19    807.22 o
   4   7  22    855.41   1729.12    630.25 <
   4   7 -22    712.50    774.36    559.58 <
   4   7  23    101.72    322.75    522.76 <
   4   7 -23    165.41     92.04    504.38 <
   4   8   0  13414.00  14133.60    505.26 o
   4   8   1  13790.20  13652.50    588.68 o
   4   8  -1  13491.90  13847.70    504.26 o
   4   8   2    137.23     96.95    198.81 <
   4   8  -2    327.27    344.84    170.57 <
   4   8   3   2857.58   2801.69    402.62 o
   4   8  -3   2614.90   3145.30    330.07 o
   4   8   4   6435.02   6895.61    623.32 o
   4   8  -4   6551.67   6048.84    462.01 o
   4   8   5  14489.50  13846.40   1096.86 o
   4   8  -5  14015.40  14322.60    774.08 o
   4   8   6   9940.40   9408.90    880.22 o
   4   8  -6   9469.56  10016.40    629.73 o
   4   8   7   6255.24   6096.70    736.67 o
   4   8  -7   6088.99   6014.48    513.20 o
   4   8   8   2086.14   1735.25    507.17 o
   4   8  -8   1860.66   2075.19    345.74 o
   4   8   9    637.71    687.23    449.13 <
   4   8  -9   1138.94    976.85    311.85 o
   4   8  10   7722.52  10384.50   1014.40 o
   4   8 -10   7063.71   8513.05    654.28 o
   4   8  11  13023.90  11999.50   1154.03 o
   4   8 -11  13636.80  13863.60    822.43 o
   4   8  12  11374.00  11573.70   1107.60 o
   4   8 -12  10916.40  10966.20    791.36 o
   4   8  13   3457.59   3550.27    685.88 o
   4   8 -13   3958.67   3569.91    458.58 o
   4   8  14    116.20    -95.72    425.83 <
   4   8 -14    149.80    -35.59    300.67 <
   4   8  15   1541.28   2588.15    660.51 o
   4   8 -15   1509.91   2289.95    413.77 o
   4   8  16   3887.24   3600.59    735.47 o
   4   8 -16   3718.81   4198.23    779.83 o
   4   8  17   4811.47   4430.17    795.80 o
   4   8 -17   4142.95   4344.27    817.03 o
   4   8  18    569.27   1041.89    609.73 <
   4   8 -18    726.06    607.46    554.73 <
   4   8  19   1174.09    873.76    553.61 <
   4   8 -19   1244.92   1357.28    619.67 <
   4   8  20     64.92    335.02    562.02 <
   4   8 -20     76.11   -112.90    477.37 <
   4   8  21   2031.05    970.71    588.46 <
   4   8 -21   2058.21   1870.25    628.48 <
   4   8  22   3478.43   2656.88    753.12 o
   4   8 -22   3692.55   4557.80    834.54 o
   4   9   0     38.81    228.26    168.08 <
   4   9   1   4764.61   4854.78    333.45 o
   4   9  -1   5139.87   6039.03    354.48 o
   4   9   2  14457.10  14358.20   1086.42 o
   4   9  -2  13817.80  14782.80    638.47 o
   4   9   3   4184.48   4322.18    407.04 o
   4   9  -3   5332.05   6056.21    457.75 o
   4   9   4   5798.71   6393.69    485.17 o
   4   9  -4   6391.35   6369.14    490.95 o
   4   9   5     35.02    385.34    361.95 <
   4   9  -5    139.69    111.68    238.08 <
   4   9   6   2656.26   2424.94    524.31 o
   4   9  -6   2676.98   2264.17    350.51 o
   4   9   7   2076.11   2908.45    556.10 o
   4   9  -7   1926.14   2141.46    353.10 o
   4   9   8   7540.81   5596.01    818.82 o
   4   9  -8   8048.22   8245.52    614.12 o
   4   9   9  11792.00  11335.60   1087.35 o
   4   9  -9  11437.80  11247.20    745.68 o
   4   9  10   5428.37   4567.62    740.28 o
   4   9 -10   5335.96   5753.09    540.04 o
   4   9  11    606.29    568.19    467.57 <
   4   9 -11    580.63    646.73    323.95 <
   4   9  12    802.01    824.67    520.32 <
   4   9 -12    937.87    827.13    343.69 <
   4   9  13   4585.53   6376.50    877.99 o
   4   9 -13   4522.25   4776.24    539.38 o
   4   9  14   6195.69   6189.97    905.68 o
   4   9 -14   6124.79   6012.03    607.76 o
   4   9  15   2492.33   3040.99    666.97 o
   4   9 -15   2414.55   2546.43    445.27 o
   4   9  16   1730.32   1759.80    638.12 <
   4   9 -16   1638.80   1181.79    599.14 <
   4   9  17    163.94    -56.45    525.24 <
   4   9 -17    190.16    160.76    530.15 <
   4   9  18   1909.70   1775.75    652.97 <
   4   9 -18   1863.02   1619.90    695.98 <
   4   9  19    950.91    865.17    590.32 <
   4   9 -19   1297.80   1792.93    695.51 <
   4   9  20   3112.20   3844.80    829.96 o
   4   9 -20   2957.29   4203.14    869.86 o
   4   9  21   2295.06   1545.04    649.74 <
   4   9 -21   2521.60   3209.11    772.43 o
   4  10   0  14350.90  14629.40    633.99 o
   4  10   1   9986.87  10080.20    654.94 o
   4  10  -1  10354.80  11638.70    536.54 o
   4  10   2   1266.86   1248.06    288.41 o
   4  10  -2   1337.66   1554.86    247.55 o
   4  10   3    897.65    844.31    272.48 o
   4  10  -3    900.94   1023.48    280.91 o
   4  10   4    918.43   1511.90    279.06 o
   4  10  -4    993.14   1007.53    284.70 o
   4  10   5  12932.20  13221.80   1135.49 o
   4  10  -5  13929.80  13867.30    799.19 o
   4  10   6   2930.54   3815.35    627.00 o
   4  10  -6   2613.99   2330.44    380.91 o
   4  10   7   4690.58   4700.16    764.53 o
   4  10  -7   5039.31   6117.57    536.89 o
   4  10   8    449.82    986.66    502.92 <
   4  10  -8    477.03    888.49    315.13 <
   4  10   9   1131.58    911.81    504.49 <
   4  10  -9    909.11    668.82    335.17 <
   4  10  10   2648.33   2440.89    617.50 o
   4  10 -10   2369.58   2450.71    414.67 o
   4  10  11   8048.87   8873.85   1038.84 o
   4  10 -11   8013.36   7469.94    664.36 o
   4  10  12   3642.55   5018.00    796.81 o
   4  10 -12   3682.01   3482.78    481.45 o
   4  10  13   4209.86   3134.26    698.48 o
   4  10 -13   3661.42   2660.56    458.26 o
   4  10  14    354.18   -125.17    499.48 <
   4  10 -14    413.20    581.69    375.46 <
   4  10  15    960.92    363.25    552.40 <
   4  10 -15   1167.82   1217.38    559.57 <
   4  10  16   2115.06   1476.32    603.03 <
   4  10 -16   2160.93   1698.44    670.39 <
   4  10  17   5365.47   4617.93    885.90 o
   4  10 -17   5623.16   6737.30   1001.96 o
   4  10  18    942.08   1578.17    675.84 <
   4  10 -18    958.60    876.22    633.26 <
   4  10  19    258.27    576.78    557.08 <
   4  10 -19    231.79   -393.93    575.50 <
   4  10  20    305.75    868.85    599.93 <
   4  10 -20    276.45    591.51    631.94 <
   4  11   0     59.68    285.94    170.51 <
   4  11   1   2123.50   1803.98    266.91 o
   4  11  -1   2344.92   2663.01    282.72 o
   4  11   2   9618.99  10512.20    655.30 o
   4  11  -2  10034.50  10507.20    548.64 o
   4  11   3   4351.67   4066.92    437.60 o
   4  11  -3   4118.60   4767.65    442.47 o
   4  11   4   6432.07   6796.21    533.84 o
   4  11  -4   6006.68   6183.84    533.29 o
   4  11   5    773.43    741.23    494.57 <
   4  11  -5    754.57    725.27    303.14 <
   4  11   6   1499.32   2825.00    608.53 o
   4  11  -6   1251.92   1988.06    377.07 o
   4  11   7    372.07    638.14    474.84 <
   4  11  -7    215.41    -63.81    305.58 <
   4  11   8  12416.80  13502.80   1204.40 o
   4  11  -8  12258.60  12595.90    835.60 o
   4  11   9   1456.14    640.60    530.52 <
   4  11  -9   1704.33   1585.54    403.88 o
   4  11  10   2660.23   2961.22    681.98 o
   4  11 -10   3050.96   2666.69    469.40 o
   4  11  11      0.68   -204.94    490.86 <
   4  11 -11     13.37   -182.85    322.73 <
   4  11  12    551.50    -11.04    527.74 <
   4  11 -12    662.09    589.05    362.06 <
   4  11  13   4551.44   3255.75    778.45 o
   4  11 -13   4570.17   4305.00    557.70 o
   4  11  14   6959.47   5206.99    914.77 o
   4  11 -14   6795.84   6661.21    669.18 o
   4  11  15   1544.68   1087.29    619.98 <
   4  11 -15   1574.15   1548.72    643.07 <
   4  11  16   1929.60   1467.73    678.93 <
   4  11 -16   1840.17   1574.49    694.76 <
   4  11  17     33.34   -398.84    547.28 <
   4  11 -17     22.62  -1046.80    532.23 <
   4  11  18   1594.58   1045.57    693.62 <
   4  11 -18   1881.59   1308.19    704.73 <
   4  11  19    276.15   -127.63    589.05 <
   4  11 -19    389.26    587.83    674.92 <
   4  12   0   4750.35   5462.25    395.11 o
   4  12   1  11024.80  12065.80    741.76 o
   4  12  -1  10950.80  11983.60    509.17 o
   4  12   2    453.49    645.51    293.20 <
   4  12  -2    587.53    381.66    236.95 <
   4  12   3    214.02    574.33    296.83 <
   4  12  -3    288.06    487.20    235.53 <
   4  12   4   1092.42   1587.99    341.84 o
   4  12  -4   1134.07    838.17    324.21 <
   4  12   5   9006.19   9977.09    670.01 o
   4  12  -5   8711.30   8949.93    676.58 o
   4  12   6    970.62   1509.45    543.30 <
   4  12  -6    832.80    717.91    340.00 <
   4  12   7   5474.33   5373.89    827.30 o
   4  12  -7   6212.48   6685.76    623.32 o
   4  12   8    475.23    -95.72    487.23 <
   4  12  -8    396.20    288.39    348.55 <
   4  12   9   1510.59   1472.63    613.62 <
   4  12  -9   1434.65   1316.78    398.95 o
   4  12  10    801.08    105.54    516.77 <
   4  12 -10    822.16    636.91    376.84 <
   4  12  11   6320.26   6257.47    994.13 o
   4  12 -11   6172.49   7451.53    691.13 o
   4  12  12   1231.01   1233.33    655.32 <
   4  12 -12   1215.75   1352.37    440.45 o
   4  12  13   2061.10    517.88    608.16 <
   4  12 -13   1789.97   1341.32    440.97 o
   4  12  14    258.92   -321.52    550.97 <
   4  12 -14    309.03   -120.26    559.61 <
   4  12  15    989.10   1403.91    655.11 <
   4  12 -15   1107.15    957.21    639.43 <
   4  12  16    740.01   1703.35    668.29 <
   4  12 -16    751.51   1090.98    690.78 <
   4  12  17   7046.48   6563.04   1029.23 o
   4  12 -17   7191.78   7970.63   1149.72 o
   4  13   0     44.95     17.18    230.71 <
   4  13   1   1156.83    944.94    333.97 <
   4  13  -1   1156.54    854.13    212.67 o
   4  13   2   6775.28   6414.55    572.97 o
   4  13  -2   6956.12   7775.51    409.58 o
   4  13   3    613.83    686.00    322.71 <
   4  13  -3    406.64    548.56    217.13 <
   4  13   4  10477.50  11587.20    757.72 o
   4  13  -4  11238.80  12080.50    610.50 o
   4  13   5     52.08    447.93    322.65 <
   4  13  -5     27.60    456.52    341.05 <
   4  13   6    119.71    190.21    474.92 <
   4  13  -6    149.33    360.80    346.02 <
   4  13   7      3.34    -66.27    492.10 <
   4  13  -7     16.89     -4.91    339.93 <
   4  13   8   7850.51   7828.28   1040.71 o
   4  13  -8   7924.87   9835.97    774.47 o
   4  13   9    173.14    184.08    546.10 <
   4  13  -9    251.92   -308.03    344.79 <
   4  13  10   1278.57   1737.71    680.81 <
   4  13 -10   1222.91   1189.15    413.59 <
   4  13  11      5.95     73.63    566.96 <
   4  13 -11      5.50   -414.79    353.35 <
   4  13  12   1250.00   1657.94    695.58 <
   4  13 -12   1399.79    694.59    407.86 <
   4  13  13    532.84   1076.25    655.12 <
   4  13 -13    567.23    268.76    551.06 <
   4  13  14   5894.92   6390.00    998.11 o
   4  13 -14   5845.55   6162.97    987.37 o
   4  13  15    184.21    161.99    598.87 <
   4  13 -15    240.30   -125.17    596.42 <
   4  13  16   2558.95   2142.68    758.74 <
   4  13 -16   2346.06   1518.04    735.63 <
   4  14   0   1016.79   1108.16    352.13 o
   4  14   1   4904.34   6248.88    553.40 o
   4  14  -1   4695.97   5052.36    432.12 o
   4  14   2     43.15      7.36    305.57 <
   4  14  -2     35.75    468.79    215.81 <
   4  14   3    295.99     84.68    306.83 <
   4  14  -3    231.36    312.93    215.96 <
   4  14   4    303.90    176.72    309.28 <
   4  14  -4    271.23    -55.22    211.10 <
   4  14   5   7033.18   7294.45    637.35 o
   4  14  -5   7507.50   8513.05    529.71 o
   4  14   6    148.17   -273.66    316.57 <
   4  14  -6    149.95    478.61    264.95 <
   4  14   7   4199.79   3668.09    735.83 o
   4  14  -7   4066.03   4381.09    411.46 o
   4  14   8     24.26    242.99    560.81 <
   4  14  -8     45.13    154.63    370.60 <
   4  14   9   1491.96    787.86    647.03 <
   4  14  -9   1591.86   1790.48    453.86 o
   4  14  10     68.36     74.86    568.19 <
   4  14 -10     65.38   -374.29    375.45 <
   4  14  11   3039.57   2476.48    758.93 o
   4  14 -11   3540.29   3459.46    545.01 o
   4  14  12     94.72    -24.54    537.51 <
   4  14 -12    102.90   -369.39    505.55 <
   4  14  13   1485.59   1294.69    703.28 <
   4  14 -13   1503.18   1475.09    628.34 <
   4  14  14     16.64    330.11    619.70 <
   4  14 -14     20.69   -485.97    519.02 <
   4  15   0      0.01    -39.27    316.61 <
   4  15   1      2.97   -554.69    296.80 <
   4  15  -1      5.54     46.63    319.07 <
   4  15   2   3617.39   5038.86    525.64 o
   4  15  -2   3088.63   3302.38    381.17 o
   4  15   3     31.45     38.04    325.21 <
   4  15  -3     39.08    192.67    224.55 <
   4  15   4   4192.23   4565.17    533.00 o
   4  15  -4   4347.41   4759.06    368.01 o
   4  15   5    148.58    112.90    342.39 <
   4  15  -5    181.79    168.13    263.85 <
   4  15   6    251.59    107.99    343.63 <
   4  15  -6    257.24    228.26    363.26 <
   4  15   7    230.09    128.85    530.16 <
   4  15  -7    248.46    897.08    408.37 <
   4  15   8   6770.86   6974.15   1002.24 o
   4  15  -8   7011.24   7874.91    736.40 o
   4  15   9    165.55   -206.17    616.04 <
   4  15  -9    167.24    703.18    434.25 <
   4  15  10   1325.87   1330.28    671.27 <
   4  15 -10   1283.16   1704.57    489.29 o
   4  15  11    143.27    252.80    576.77 <
   4  15 -11    124.55    123.95    537.51 <
   4  16   0     36.42     -3.68    357.11 <
   4  16   1   2690.11   3081.49    482.88 o
   4  16  -1   2827.07   3783.44    507.55 o
   4  16   2     56.25     24.54    355.89 <
   4  16  -2     52.24    370.61    343.55 <
   4  16   3     39.78    -60.13    344.84 <
   4  16  -3     42.99    233.17    288.36 <
   4  16   4     40.34   -314.16    363.20 <
   4  16  -4     53.09   -292.07    373.02 <
   4  16   5   5628.35   6620.72    654.01 o
   4  16  -5   5570.37   6812.16    711.26 o
   4  16   6     54.98   -214.76    364.45 <
   4  16  -6     48.23    207.40    369.37 <
   4  16   7   3838.48   3769.94    816.17 o
   4  16  -7   3797.34   5299.03    599.35 o
   4  16  -8     47.26    564.51    466.22 <
   5   0   1  14624.80  14075.90    498.76 o
   5   0   2   9139.58   8662.77    363.89 o
   5   0   3   1610.10   1565.90    160.88 o
   5   0   4  34249.70  35745.70   1254.07 o
   5   0   5  28428.70  29480.90   1298.23 o
   5   0   6     61.27    471.24    257.57 <
   5   0   7   6655.99   6154.38    430.26 o
   5   0   8  35524.60  34740.70   1514.29 o
   5   0   9    811.98    408.66    278.78 <
   5   0  10   4754.50   6328.64    431.27 o
   5   0  11   9254.75   9939.05    562.60 o
   5   0  12    533.15    423.38    208.69 <
   5   0  13   4390.00   4830.24    428.24 o
   5   0  14   8157.13   8371.92    552.60 o
   5   0  15   1341.38   2103.41    314.20 o
   5   0  16   4174.62   5011.86    464.06 o
   5   0  17   6043.01   5994.85    518.03 o
   5   0  18   4954.75   5485.56    496.73 o
   5   0  19    408.97    755.95    267.31 <
   5   0  20   6364.57   6077.07    548.19 o
   5   0  21   6520.34   6299.19    571.30 o
   5   0  22    129.26    158.31    255.25 <
   5   0  23   3518.27   3414.06    444.46 o
   5   0  24    778.62    779.27    305.57 <
   5   1   0     47.35    838.17    158.77 o
   5   1   1  13232.80  14300.50    498.94 o
   5   1  -1  13951.10  14597.50    503.16 o
   5   1   2  16005.60  15063.80    565.25 o
   5   1  -2  18664.20  18199.30    574.62 o
   5   1   3     12.89   -254.03    132.45 <
   5   1  -3      1.73    -67.50    111.67 <
   5   1   4   7288.68   6774.12    400.00 o
   5   1  -4   9530.29   9720.61    354.51 o
   5   1   5  28341.70  31520.50   1054.50 o
   5   1  -5  25604.50  28376.40   1057.23 o
   5   1   6   5314.89   6904.20    344.45 o
   5   1  -6   4930.33   5637.73    330.73 o
   5   1   7  12784.10  11157.70    613.34 o
   5   1  -7  11890.90  11821.60    508.49 o
   5   1   8  11824.70  12085.40    586.41 o
   5   1  -8  10470.50   9421.18    598.55 o
   5   1   9   4362.46   4385.99    472.41 o
   5   1  -9   4443.29   4405.63    364.60 o
   5   1  10   9071.25   9854.38    521.41 o
   5   1 -10   8206.41   8093.35    361.47 o
   5   1  11  14735.80  14023.20   1111.82 o
   5   1 -11  16306.00  16119.20    644.30 o
   5   1  12    987.05   1108.16    374.20 <
   5   1 -12    715.21    830.81    239.20 o
   5   1  13   3841.31   4631.43    631.78 o
   5   1 -13   4384.72   5095.31    431.07 o
   5   1  14   8794.46   8563.37    900.13 o
   5   1 -14   8949.90   9810.20    587.80 o
   5   1  15   1665.79   1543.81    448.04 o
   5   1 -15   1532.07   1877.61    301.35 o
   5   1  16   2830.93   4030.11    600.62 o
   5   1 -16   2902.38   3601.82    398.49 o
   5   1  17  13759.80  13879.60   1145.81 o
   5   1 -17  13134.60  13189.90    764.29 o
   5   1  18   2355.63   2418.80    559.53 o
   5   1 -18   2874.31   3850.94    421.21 o
   5   1  19    533.09    895.85    417.07 <
   5   1 -19    633.26   1063.98    295.40 o
   5   1  20   7161.64   6458.73    861.72 o
   5   1 -20   7687.29   8864.03    642.61 o
   5   1  21   3512.38   3761.35    634.08 o
   5   1 -21   3515.06   3750.31    448.64 o
   5   1  22    148.51    661.46    388.85 <
   5   1 -22    228.99    773.13    299.15 <
   5   1  23   3899.06   3304.84    661.07 o
   5   1 -23   3494.49   3772.40    459.61 o
   5   1  24   3493.14   3753.99    669.67 o
   5   1 -24   2805.44   3180.89    428.80 o
   5   2   0    485.03    338.71    186.62 <
   5   2   1  20365.10  20868.50    699.22 o
   5   2  -1  21794.00  22466.30    701.20 o
   5   2   2  17217.50  17810.30    688.10 o
   5   2  -2  16868.10  17739.10    590.82 o
   5   2   3   1400.54   1516.81    183.83 o
   5   2  -3   1257.43   1326.60    154.47 o
   5   2   4  35876.40  37802.50   1288.55 o
   5   2  -4  34973.60  36289.40   1116.58 o
   5   2   5  25287.10  25837.40    996.39 o
   5   2  -5  29301.30  28965.50    875.52 o
   5   2   6   2816.49   3271.70    283.38 o
   5   2  -6   2231.81   2051.87    215.23 o
   5   2   7   8669.82   8246.75    660.44 o
   5   2  -7   6972.29   7679.79    392.83 o
   5   2   8  17264.40  18255.80   1119.89 o
   5   2  -8  17107.40  15859.00    679.30 o
   5   2   9   3133.11   3525.73    420.08 o
   5   2  -9   3374.27   3326.93    271.37 o
   5   2  10   3615.25   4643.71    548.87 o
   5   2 -10   3492.52   4216.64    295.62 o
   5   2  11  11754.60  11130.70    883.26 o
   5   2 -11  10621.40  10074.00    484.16 o
   5   2  12   2869.56   2501.02    501.21 o
   5   2 -12   2982.90   2766.10    314.68 o
   5   2  13   5380.86   5721.18    697.54 o
   5   2 -13   5176.48   4827.79    419.57 o
   5   2  14   7841.79   7499.39    856.17 o
   5   2 -14   7696.11   8746.22    559.09 o
   5   2  15   1397.37   2010.15    476.76 o
   5   2 -15   1520.23   1843.25    295.25 o
   5   2  16   5406.19   5043.77    771.33 o
   5   2 -16   5885.71   6104.07    491.39 o
   5   2  17   9496.90   9408.90   1017.56 o
   5   2 -17   9660.13   8931.52    616.50 o
   5   2  18   4200.00   3893.89    676.67 o
   5   2 -18   3312.84   3892.66    410.95 o
   5   2  19    911.14     66.27    388.00 <
   5   2 -19    756.71    990.35    277.14 o
   5   2  20   8713.13   8013.58    989.45 o
   5   2 -20   8179.94   9269.00    641.48 o
   5   2  21   1425.16   1294.69    482.38 <
   5   2 -21   1375.79   1843.25    335.62 o
   5   2  22    858.46   1257.87    484.49 <
   5   2 -22    681.48    652.87    281.05 <
   5   2  23   4189.98   3596.91    689.33 o
   5   2 -23   4180.49   4698.93    483.45 o
   5   2  24   1282.53    493.33    443.38 <
   5   2 -24   1342.35   1445.64    338.59 o
   5   3   0   5494.75   5587.42    274.39 o
   5   3   1  10566.00  10869.30    471.86 o
   5   3  -1  10226.60   9952.55    404.34 o
   5   3   2  18440.10  18239.80    748.67 o
   5   3  -2  20599.90  20662.30    653.57 o
   5   3   3   1655.43   1516.81    194.20 o
   5   3  -3   2251.17   2373.40    183.67 o
   5   3   4  18876.70  20070.80    794.74 o
   5   3  -4  21829.30  22277.30    698.18 o
   5   3   5  26391.10  27484.30   1181.25 o
   5   3  -5  27077.10  26246.00    995.04 o
   5   3   6    204.12   -287.16    171.71 <
   5   3  -6      6.33   -115.36    119.02 <
   5   3  -7   6125.66   6245.20    335.66 o
   5   3  -8  15214.70  14559.40    625.10 o
   5   3   9   6115.39   6153.16    671.18 o
   5   3  -9   6314.46   6518.86    477.87 o
   5   3  10   3369.09   4329.54    552.84 o
   5   3 -10   3320.25   4178.60    293.97 o
   5   3  11  12411.40  10810.40   1011.10 o
   5   3 -11  14471.60  13369.10    572.83 o
   5   3  12   6353.27   6747.12    743.97 o
   5   3 -12   5824.38   5728.55    359.98 o
   5   3  13   3810.41   4897.74    642.23 o
   5   3 -13   3577.89   3807.99    302.36 o
   5   3  14  11385.50  10906.10   1001.58 o
   5   3 -14  11585.60  10809.10    525.93 o
   5   3  15   1469.68   1540.13    476.09 o
   5   3 -15   1566.25   2269.08    305.55 o
   5   3  16   3083.73   2875.32    599.14 o
   5   3 -16   2643.34   2267.86    312.48 o
   5   3  17  10495.80  10863.10   1115.80 o
   5   3 -17  10012.00   9329.14    631.09 o
   5   3  18   2002.95   1468.95    524.46 <
   5   3 -18   2212.30   1725.44    305.15 o
   5   3  19   2960.41   2799.23    612.57 o
   5   3 -19   3097.64   2661.79    358.03 o
   5   3  20   5736.83   5513.79    852.06 o
   5   3 -20   5885.33   6138.43    526.92 o
   5   3  21   2019.67   2710.87    664.45 o
   5   3 -21   2100.07   2258.04    345.80 o
   5   3  22   2288.05   2269.08    641.84 o
   5   3 -22   2257.45   2262.95    368.15 o
   5   3  23   2140.52   1142.52    521.09 <
   5   3 -23   2424.58   2901.09    641.28 o
   5   3  24   2658.12   2615.15    682.36 o
   5   3 -24   2470.87   3006.63    680.50 o
   5   4   0   5857.11   6053.75    340.24 o
   5   4   1  17348.10  19512.40    738.96 o
   5   4  -1  17696.00  19480.50    637.70 o
   5   4   2  17818.80  17541.50    658.53 o
   5   4  -2  16545.30  15310.50    571.19 o
   5   4   3   3166.92   3680.36    253.37 o
   5   4  -3   3172.60   3355.15    222.63 o
   5   4   4  20713.20  22493.30   1019.47 o
   5   4  -4  21909.30  22681.00    869.70 o
   5   4   5   4113.12   4587.25    338.28 o
   5   4  -5   4847.83   4587.25    317.64 o
   5   4   6   4175.90   4728.38    495.67 o
   5   4  -6   4363.92   4875.65    331.87 o
   5   4   7   6462.41   5597.24    555.91 o
   5   4  -7   5725.27   5982.58    369.52 o
   5   4  -8  12294.60  11793.30    666.32 o
   5   4   9   3848.39   5351.80    619.05 o
   5   4  -9   4224.83   4141.78    390.48 o
   5   4  10   5622.25   6162.97    669.99 o
   5   4 -10   4641.84   4636.34    417.26 o
   5   4  11   7414.98   6920.15    727.78 o
   5   4 -11   6016.30   5604.60    470.13 o
   5   4  12   6667.81   6350.73    757.90 o
   5   4 -12   6419.16   6030.44    483.61 o
   5   4  13   4525.94   4670.70    690.65 o
   5   4 -13   5584.68   5270.80    464.85 o
   5   4  14  10261.60  10320.70    949.68 o
   5   4 -14   9210.78   8144.89    617.52 o
   5   4  15   2680.01   2888.82    594.93 o
   5   4 -15   3171.34   2988.22    375.92 o
   5   4  16   3957.33   3996.97    712.94 o
   5   4 -16   4456.39   4790.97    695.22 o
   5   4  17   6664.00   6698.03    893.33 o
   5   4 -17   6842.29   8066.35    896.75 o
   5   4  18   2039.38   1558.54    546.51 <
   5   4 -18   2163.15   2109.55    510.57 o
   5   4  19   2716.35   2356.21    629.93 o
   5   4 -19   2603.72   2411.44    570.87 o
   5   4  20   5634.06   5746.95    868.66 o
   5   4 -20   5947.80   6620.72    858.93 o
   5   4  21   2123.50   2801.69    665.67 o
   5   4 -21   1791.72   1772.07    553.48 o
   5   4  22    615.21    488.42    467.60 <
   5   4 -22    613.46    338.71    439.41 <
   5   4  23   2541.87   1356.05    558.14 <
   5   4 -23   2706.61   2564.84    633.39 o
   5   5   0   8600.50   9018.66    429.67 o
   5   5   1  11825.30  11345.40    520.71 o
   5   5  -1  12375.00  12638.90    528.48 o
   5   5   2  10826.90  10904.90    487.96 o
   5   5  -2  10634.20  10350.20    486.37 o
   5   5   3   3807.78   3614.09    314.77 o
   5   5  -3   3184.34   3390.74    263.15 o
   5   5   4   7246.15   7657.70    459.63 o
   5   5  -4   7129.52   6655.08    392.45 o
   5   5   5  10046.20  11736.90    817.31 o
   5   5  -5  11070.60  10466.70    515.09 o
   5   5   6    580.31    641.82    267.49 <
   5   5  -6    977.69   1292.24    210.60 o
   5   5  -7   6805.31   6828.11    489.57 o
   5   5   8   9960.96   8807.58    819.54 o
   5   5  -8   9155.40   8720.45    571.22 o
   5   5   9   1695.76   1519.27    439.51 o
   5   5  -9   1453.39   1486.13    279.75 o
   5   5  10   3890.79   4047.29    598.59 o
   5   5 -10   3773.58   3380.92    387.52 o
   5   5  11  14183.00  13450.10   1106.90 o
   5   5 -11  12713.90  12081.70    729.35 o
   5   5  12   9041.82   7704.33    875.86 o
   5   5 -12   8511.25   8218.53    602.40 o
   5   5  13   4957.89   4525.90    689.24 o
   5   5 -13   4668.08   4604.44    453.01 o
   5   5  14   8011.56   7315.31    921.92 o
   5   5 -14   8863.24   9662.93    662.12 o
   5   5  15   3496.80   3417.74    664.02 o
   5   5 -15   3929.33   4092.70    447.53 o
   5   5  16   3260.40   3731.90    693.95 o
   5   5 -16   3065.66   3280.29    416.81 o
   5   5  17   5780.63   5858.63    842.94 o
   5   5 -17   5836.57   5543.24    781.06 o
   5   5  18   3007.96   2046.96    598.66 o
   5   5 -18   2959.02   1606.40    545.01 <
   5   5  19   1265.97   1352.37    568.14 <
   5   5 -19   1397.24   1016.12    515.65 <
   5   5  20   3912.53   3043.44    714.08 o
   5   5 -20   2926.61   2099.73    578.91 o
   5   5  21   1479.89   1235.79    583.07 <
   5   5 -21   1516.15    996.48    488.76 <
   5   5  22    993.41    537.51    530.31 <
   5   5 -22    943.53    822.22    537.56 <
   5   5  23   3795.53   1754.89    635.32 <
   5   5 -23   3961.85   4870.74    801.21 o
   5   6   0   5603.49   6931.20    380.58 o
   5   6   1   7932.25   7845.46    401.75 o
   5   6  -1   7675.74   7314.08    403.08 o
   5   6   2  14508.10  14555.80    755.71 o
   5   6  -2  15496.60  15197.60    626.59 o
   5   6   3   5257.02   6423.14    436.28 o
   5   6  -3   5538.29   5917.53    366.56 o
   5   6   4   5424.89   5178.76    372.77 o
   5   6  -4   5158.22   4770.11    343.86 o
   5   6   5   9216.74   8802.67    738.88 o
   5   6  -5  10037.50   9540.21    483.73 o
   5   6  -6   3981.50   3757.67    309.99 o
   5   6  -7   5343.86   4889.14    429.72 o
   5   6   8  10899.20  11379.80    963.08 o
   5   6  -8  10729.80  10717.10    665.19 o
   5   6   9   7639.19   8589.14    830.75 o
   5   6  -9   6732.06   6417.00    539.76 o
   5   6  10   8155.93   7050.24    835.89 o
   5   6 -10   8014.85   8559.68    604.22 o
   5   6  11   8686.15   9709.57   1022.21 o
   5   6 -11   8775.14  10330.50    668.90 o
   5   6  12    177.99   -208.62    391.45 <
   5   6 -12    423.15    557.15    273.60 <
   5   6  13   7244.74   7039.19    882.79 o
   5   6 -13   7805.04   7334.94    594.32 o
   5   6  14   5931.94   5621.78    824.02 o
   5   6 -14   5623.89   5278.17    504.14 o
   5   6  15   2221.24   2810.28    622.76 o
   5   6 -15   2556.51   2440.89    387.99 o
   5   6  16   3453.61   3394.42    693.44 o
   5   6 -16   2876.27   3394.42    435.86 o
   5   6  17   3298.59   3362.51    732.56 o
   5   6 -17   3580.67   3566.23    456.55 o
   5   6  18   3624.54   2789.41    655.14 o
   5   6 -18   3423.25   3571.14    693.16 o
   5   6  19   1285.42   1235.79    553.49 <
   5   6 -19   1198.03    649.19    489.90 <
   5   6  20   3502.76   4118.47    799.33 o
   5   6 -20   3923.12   4379.86    801.94 o
   5   6  21   3666.33   3886.53    794.94 o
   5   6 -21   3410.17   2930.54    735.63 o
   5   6  22   1451.56    692.14    572.21 <
   5   6 -22   1691.03   1218.60    583.22 <
   5   7   0  13093.40  13593.60    586.01 o
   5   7   1  10116.10  11103.70    601.54 o
   5   7  -1   9825.23   9496.03    481.59 o
   5   7   2   7700.95   7293.22    497.41 o
   5   7  -2   7324.79   7323.90    406.21 o
   5   7   3  10069.60  10600.50    550.79 o
   5   7  -3   7861.79   7272.36    444.44 o
   5   7   4   6636.52   6288.15    615.79 o
   5   7  -4   6098.71   6232.92    392.14 o
   5   7   5   8172.77   8025.85    730.61 o
   5   7  -5   8476.11   9110.70    470.51 o
   5   7   6   2820.49   3901.25    469.07 o
   5   7  -6   3972.19   4200.69    398.21 o
   5   7   7   4823.26   4409.31    634.03 o
   5   7  -7   4647.65   4643.71    433.21 o
   5   7   8   6301.16   5268.35    674.80 o
   5   7  -8   5794.70   4982.41    466.33 o
   5   7   9   3959.06   3670.54    622.65 o
   5   7  -9   4232.18   4000.66    427.65 o
   5   7  10   8501.01   9078.79    963.16 o
   5   7 -10   8126.94   7609.84    611.67 o
   5   7  11   5303.76   4768.88    729.92 o
   5   7 -11   4974.52   5103.90    492.98 o
   5   7  12   7582.06   8116.67    927.77 o
   5   7 -12   6906.22   6266.06    568.91 o
   5   7  13   7647.40   6823.20    919.64 o
   5   7 -13   8470.19   8326.52    647.23 o
   5   7  14   3591.67   2208.95    653.15 o
   5   7 -14   3697.06   4675.61    486.09 o
   5   7  15   3595.46   3074.12    697.69 o
   5   7 -15   3481.45   3266.79    449.58 o
   5   7  16   2274.50   1905.83    653.17 <
   5   7 -16   2429.82   2624.97    410.79 o
   5   7  17   2311.64   3036.08    742.95 o
   5   7 -17   2588.24   2470.34    413.76 o
   5   7  18   2725.21   1991.74    669.47 <
   5   7 -18   2783.16   2887.59    647.84 o
   5   7  19   1533.20   1978.24    647.62 o
   5   7 -19   1341.94   1424.77    589.00 <
   5   7  20   2426.86   1638.31    673.10 <
   5   7 -20   1959.46   1293.46    577.25 <
   5   7  21   2743.54   2503.48    714.46 o
   5   7 -21   2682.01   3060.62    745.74 o
   5   7  22   1544.67    725.27    598.01 <
   5   7 -22   1525.83   1735.25    588.90 <
   5   8   0   7953.28   7894.54    551.23 o
   5   8   1   4494.29   4643.71    395.92 o
   5   8  -1   5057.74   4957.87    329.29 o
   5   8   2  10515.20  10875.40    625.45 o
   5   8  -2   9515.07  10465.50    515.36 o
   5   8   3   6560.00   5912.63    458.83 o
   5   8  -3   7404.42   7627.02    421.09 o
   5   8   4   3906.04   4452.26    508.06 o
   5   8  -4   2878.95   2869.18    297.01 o
   5   8   5   7458.89   7816.00    737.78 o
   5   8  -5   8163.23   9078.79    485.26 o
   5   8   6   7916.16   7330.04    555.59 o
   5   8  -6   8078.14   8752.35    577.82 o
   5   8   7   3523.13   2233.49    525.76 o
   5   8  -7   3312.20   3216.48    405.18 o
   5   8   8   3732.70   3142.85    607.10 o
   5   8  -8   3426.32   3151.44    400.66 o
   5   8   9   4767.83   4524.67    718.33 o
   5   8  -9   4483.74   4173.69    462.19 o
   5   8  10   7393.86   7125.09    920.96 o
   5   8 -10   8008.58   8158.39    632.72 o
   5   8  11   5479.83   5376.34    796.64 o
   5   8 -11   5389.76   5056.04    510.19 o
   5   8  12   3961.48   3833.76    732.82 o
   5   8 -12   4326.61   4685.43    492.45 o
   5   8  13   4108.19   3141.62    683.63 o
   5   8 -13   3995.50   3715.95    473.07 o
   5   8  14   3173.75   2610.24    647.38 o
   5   8 -14   3197.15   3055.72    449.41 o
   5   8  15   2355.18   1071.34    572.77 <
   5   8 -15   2053.67   2051.87    401.30 o
   5   8  16   1507.46   2259.27    663.31 o
   5   8 -16   1202.47   1778.21    390.85 o
   5   8  17   1517.28   1030.84    595.45 <
   5   8 -17   1547.08   1127.79    356.29 o
   5   8  18   1712.53   1302.05    586.87 <
   5   8 -18   1871.81   1857.97    624.65 <
   5   8  19   2439.50   2202.81    693.57 o
   5   8 -19   2652.96   2728.05    669.97 o
   5   8  20   2762.33   2540.29    721.80 o
   5   8 -20   2606.90   2481.39    682.44 o
   5   8  21   2120.72   2218.77    748.51 <
   5   8 -21   2415.14   3534.32    790.35 o
   5   9   0   3331.45   3819.03    390.26 o
   5   9   1   5309.32   5313.75    445.46 o
   5   9  -1   5445.57   5340.75    301.16 o
   5   9   2   3149.65   3150.21    352.20 o
   5   9  -2   3472.02   3880.39    317.79 o
   5   9   3   6338.33   6248.88    635.92 o
   5   9  -3   5341.43   5272.03    380.69 o
   5   9   4   5781.90   6307.78    655.24 o
   5   9  -4   6576.72   7017.10    438.73 o
   5   9   5   2324.78   2999.26    359.41 o
   5   9  -5   2341.83   2156.18    288.77 o
   5   9   6   6863.27   6905.43    544.73 o
   5   9  -6   7444.04   8220.98    604.74 o
   5   9   7   6026.81   6499.22    791.76 o
   5   9  -7   5774.85   5961.71    535.74 o
   5   9   8   5925.19   5353.02    722.76 o
   5   9  -8   4945.35   4469.44    487.18 o
   5   9   9   4022.34   4190.87    750.80 o
   5   9  -9   4954.01   5262.21    513.37 o
   5   9  10   4080.93   2963.68    676.43 o
   5   9 -10   4322.27   4788.52    502.00 o
   5   9  11   5470.00   4640.02    802.72 o
   5   9 -11   6076.76   5262.21    540.97 o
   5   9  12   6906.43   5710.14    866.20 o
   5   9 -12   6569.43   5672.10    587.81 o
   5   9  13   1979.60   1843.25    633.34 <
   5   9 -13   1989.05   1817.48    406.41 o
   5   9  14   1081.20    454.06    511.96 <
   5   9 -14   1272.75   1546.27    392.43 o
   5   9  15   3217.25   4095.15    800.25 o
   5   9 -15   2783.41   4006.79    513.14 o
   5   9  16   2472.61   1468.95    651.16 <
   5   9 -16   2594.35   3238.57    481.21 o
   5   9  17    951.61   1806.43    643.74 <
   5   9 -17    806.18    943.71    386.48 <
   5   9  18   1793.78   1477.54    621.18 <
   5   9 -18   1758.80   2259.27    662.26 o
   5   9  19   2719.44   1741.39    667.18 <
   5   9 -19   2764.51   2690.01    741.30 o
   5   9  20   1320.65    967.03    675.11 <
   5   9 -20   1492.55   1385.50    629.61 <
   5  10   0   3484.34   3226.30    389.61 o
   5  10   1   3785.90   4795.88    420.54 o
   5  10  -1   2894.69   3421.42    310.24 o
   5  10   2   4365.59   4937.01    427.83 o
   5  10  -2   4153.56   4755.38    361.23 o
   5  10   3   6574.27   7132.46    736.14 o
   5  10  -3   6153.15   6873.52    437.66 o
   5  10   4   4751.25   5132.13    473.85 o
   5  10  -4   4295.42   4978.73    385.55 o
   5  10   5   2840.04   2567.29    350.30 o
   5  10  -5   2217.54   2163.54    298.31 o
   5  10   6   3540.00   3892.66    427.46 o
   5  10  -6   3932.05   4015.38    450.18 o
   5  10   7   2989.48   2304.67    591.06 o
   5  10  -7   2803.20   2825.00    407.39 o
   5  10   8   1315.40   1232.10    533.88 <
   5  10  -8   1102.05   1131.47    337.45 o
   5  10   9   5328.99   6007.12    846.76 o
   5  10  -9   5719.83   4880.55    534.77 o
   5  10  10   2468.52   2298.54    654.26 o
   5  10 -10   2565.28   2854.46    436.39 o
   5  10  11   1065.36   1068.89    569.42 <
   5  10 -11   1005.01    562.05    345.08 <
   5  10  12   3185.95   2869.18    732.98 o
   5  10 -12   2739.78   3744.17    514.88 o
   5  10  13   3927.62   3411.60    746.79 o
   5  10 -13   4148.80   3923.34    524.47 o
   5  10  14   3629.13   2013.83    729.24 <
   5  10 -14   3742.60   3524.50    499.89 o
   5  10  15   3152.43   3195.62    764.49 o
   5  10 -15   3316.99   2583.25    472.42 o
   5  10  16   2132.49   1979.47    740.11 <
   5  10 -16   2010.05   1570.81    429.99 o
   5  10  17   1232.14     78.54    570.90 <
   5  10 -17   1346.83   1203.88    648.03 <
   5  10  18    921.63    479.83    589.18 <
   5  10 -18   1045.65   1708.26    630.36 <
   5  10  19   3040.81   2200.36    749.33 <
   5  10 -19   2701.52   2431.07    714.48 o
   5  11   0   5883.16   6338.46    523.81 o
   5  11   1   3081.52   3054.49    386.62 o
   5  11  -1   3239.33   3482.78    315.92 o
   5  11   2   3442.25   4200.69    436.28 o
   5  11  -2   3484.34   3794.49    347.65 o
   5  11   3   4912.35   5387.39    504.29 o
   5  11  -3   4839.81   5935.94    420.76 o
   5  11   4   3478.12   3780.99    415.30 o
   5  11  -4   2679.53   2642.15    320.38 o
   5  11   5    330.68    546.10    295.66 <
   5  11  -5    285.03    193.90    249.14 <
   5  11   6   7312.61   7970.63    621.23 o
   5  11  -6   7005.13   8349.83    644.81 o
   5  11   7   2985.59   2443.35    639.96 o
   5  11  -7   3071.89   2674.06    419.18 o
   5  11   8   1981.75   1873.93    621.05 o
   5  11  -8   2157.21   1649.35    398.23 o
   5  11   9   3980.04   3794.49    770.93 o
   5  11  -9   4383.17   4793.42    541.48 o
   5  11  10   2154.94   3112.17    702.17 o
   5  11 -10   2550.27   2764.87    468.46 o
   5  11  11   2109.53   1514.36    639.79 <
   5  11 -11   2086.94   1950.01    421.10 o
   5  11  12   4026.64   3167.39    754.55 o
   5  11 -12   4286.26   4664.57    574.76 o
   5  11  13   2382.63   1714.39    677.92 <
   5  11 -13   2460.90   2836.05    481.73 o
   5  11  14   1067.64    602.55    630.93 <
   5  11 -14   1089.13   1075.02    431.98 <
   5  11  15   2855.71   1391.64    709.13 <
   5  11 -15   2555.21   1888.65    445.09 o
   5  11  16   3332.67   2637.24    771.37 o
   5  11 -16   3087.66   2798.00    490.11 o
   5  11  17    468.52   1108.16    679.64 <
   5  11 -17    542.56   1135.16    620.72 <
   5  11  18   2541.09   3085.17    827.85 o
   5  11 -18   2461.95   2540.29    753.43 o
   5  12   0   5571.64   6791.30    557.11 o
   5  12   1   2062.97   2281.36    389.92 o
   5  12  -1   2041.10   2174.59    288.13 o
   5  12   2   2571.06   2721.92    398.57 o
   5  12  -2   2723.54   2919.50    332.12 o
   5  12   3   5677.02   7145.96    582.14 o
   5  12  -3   5487.77   7159.46    474.90 o
   5  12   4   1626.75   1071.34    339.26 o
   5  12  -4   1417.28   1562.22    302.92 o
   5  12   5   2636.33   3074.12    418.89 o
   5  12  -5   2305.34   2272.77    333.86 o
   5  12   6   4070.93   4230.14    485.60 o
   5  12  -6   5028.88   5584.96    443.67 o
   5  12   7   2819.08   2882.68    684.70 o
   5  12  -7   2926.39   3174.75    459.75 o
   5  12   8    375.97   -277.35    508.04 <
   5  12  -8    533.75   1049.25    359.23 <
   5  12   9   3503.40   3449.65    765.84 o
   5  12  -9   3621.67   4773.79    565.81 o
   5  12  10   2607.98   2108.32    709.75 <
   5  12 -10   2684.91   2750.14    496.92 o
   5  12  11    313.83    429.52    613.58 <
   5  12 -11    550.99    850.45    390.09 <
   5  12  12   3172.11   2914.59    769.72 o
   5  12 -12   2594.42   2410.21    488.67 o
   5  12  13   1947.75   1337.64    670.42 <
   5  12 -13   2009.59   1626.03    440.97 o
   5  12  14   1369.25   1468.95    706.81 <
   5  12 -14   1310.01   1487.36    449.00 o
   5  12  15   3062.03   2305.90    773.80 <
   5  12 -15   2781.99   3099.89    519.84 o
   5  12  16   1961.80   2453.16    813.26 o
   5  12 -16   1835.57   2568.52    727.10 o
   5  13   0   4768.15   4975.05    405.54 o
   5  13   1   1844.09   2366.03    404.22 o
   5  13  -1   1845.11   2105.87    262.08 o
   5  13   2   2062.89   2181.95    402.35 o
   5  13  -2   2300.82   2141.46    314.46 o
   5  13   3   4455.07   4817.97    505.93 o
   5  13  -3   4500.56   4820.42    415.05 o
   5  13   4   1261.50    714.23    350.12 <
   5  13  -4   1289.99   1152.34    289.77 o
   5  13   5    881.27   1338.87    375.14 o
   5  13  -5   1195.32   1776.98    329.37 o
   5  13   6   4808.65   6358.10    887.00 o
   5  13  -6   5013.27   5624.23    473.06 o
   5  13   7   1267.41   1614.99    626.88 <
   5  13  -7   1523.65   1526.63    414.79 o
   5  13   8    117.34    139.90    525.24 <
   5  13  -8    145.54    353.43    370.57 <
   5  13   9   2138.94   2418.80    717.67 o
   5  13  -9   2082.98   2799.23    496.03 o
   5  13  10   2353.20   2224.90    736.42 o
   5  13 -10   2629.05   3028.72    513.59 o
   5  13  11    772.09    836.95    663.89 <
   5  13 -11    603.28    458.97    384.16 <
   5  13  12   1667.71   1316.78    732.82 <
   5  13 -12   1853.71   1713.16    459.11 o
   5  13  13   2829.00   2131.64    770.02 <
   5  13 -13   3063.12   4020.29    578.83 o
   5  13  14    360.07    845.54    680.96 <
   5  13 -14    209.83    727.73    429.34 <
   5  13 -15   1961.17   2340.26    749.52 o
   5  14   0   3504.20   4538.17    520.57 o
   5  14   1    616.00    481.06    347.35 <
   5  14  -1    623.68    689.68    280.99 <
   5  14   2    389.06    635.69    347.19 <
   5  14  -2    528.75    721.59    229.34 o
   5  14   3   3972.64   4129.51    496.67 o
   5  14  -3   4295.42   4788.52    350.47 o
   5  14   4    796.75    943.71    379.11 <
   5  14  -4    629.80    198.81    234.56 <
   5  14   5   1508.03   1213.70    381.93 o
   5  14  -5   1522.18   1772.07    333.46 o
   5  14   6   2466.14   3214.02    458.91 o
   5  14  -6   2601.75   2342.72    375.97 o
   5  14   7   3448.45   3994.52    771.19 o
   5  14  -7   3767.84   4599.53    455.64 o
   5  14   8    462.48   -311.71    547.31 <
   5  14  -8    384.37    353.43    390.26 <
   5  14   9   2283.10   1867.79    699.82 <
   5  14  -9   2154.47   2114.46    477.43 o
   5  14  10   1451.54   1519.27    727.69 <
   5  14 -10   1732.59   2229.81    496.46 o
   5  14  11     14.36    -15.95    635.69 <
   5  14 -11     17.29   -115.36    404.97 <
   5  14  12   1831.65   1475.09    764.74 <
   5  14 -12   2038.26   2460.53    519.83 o
   5  15   0   2347.88   1643.21    414.42 o
   5  15   1    626.57    239.30    354.77 <
   5  15  -1    659.97    937.58    363.08 <
   5  15   2    778.15    838.17    361.99 <
   5  15  -2    799.95    677.41    304.42 <
   5  15   3   2180.84   2721.92    459.40 o
   5  15  -3   2106.65   2491.21    371.19 o
   5  15   4   1018.93   1664.08    408.05 o
   5  15  -4    997.67   1385.50    280.57 o
   5  15   5    217.17    397.61    368.11 <
   5  15  -5    197.56    375.52    246.60 <
   5  15   6   4228.18   3832.53    528.49 o
   5  15  -6   4766.45   5192.26    393.70 o
   5  15   7   1067.43   1250.51    429.38 <
   5  15  -7   1121.57   1298.37    345.90 o
   5  15   8     52.29     60.13    554.69 <
   5  15  -8     87.83   -255.26    300.62 <
   5  15   9   1911.01   1947.56    739.97 <
   5  15  -9   2084.74   2645.83    514.71 o
   5  16   0   1639.61   1979.47    437.72 o
   5  16   1    563.38    368.16    370.67 <
   5  16  -1    526.81    427.06    374.33 <
   5  16   2    446.32    161.99    360.85 <
   5  16  -2    470.90    166.90    292.15 <
   5  16   3   2590.16   2439.66    471.45 o
   5  16  -3   2703.90   2238.40    377.54 o
   5  16   4    852.60    597.64    389.14 <
   5  16  -4    886.08    430.74    322.97 <
   5  16   5     96.77    117.81    519.10 <
   6   0   0     78.31    225.80    185.27 <
   6   0   1  10811.90  10693.80    498.92 o
   6   0   2   6241.92   6108.98    358.95 o
   6   0   3  32606.50  32798.00   1190.20 o
   6   0   5   1817.06   1601.49    256.86 o
   6   0   6   5047.63   5045.00    395.17 o
   6   0   7  16648.00  15501.90    797.65 o
   6   0   8   2130.61   2181.95    285.83 o
   6   0   9  26948.20  27464.60   1247.50 o
   6   0  10    770.91    982.98    234.17 o
   6   0  12     24.44     55.22    201.26 <
   6   0  13  13907.20  13733.50    758.02 o
   6   0  14    300.90    628.32    237.88 <
   6   0  15  11920.10  11685.40    699.33 o
   6   0  16    466.26    879.90    263.54 o
   6   0  17    314.65    117.81    238.12 <
   6   0  18   1833.20   1516.81    470.31 o
   6   0  19   8539.44  10287.60    969.74 o
   6   0  20     50.71    -74.86    347.29 <
   6   0  21   4795.31   5314.98    768.53 o
   6   0  22    249.89    314.16    362.01 <
   6   0  23    405.76    376.75    371.85 <
   6   1   0  38381.90  39145.10   1389.64 o
   6   1   1    325.23    485.97    207.31 <
   6   1  -1    463.58    898.31    222.96 o
   6   1   2   6516.00   6613.35    373.84 o
   6   1  -2   6947.49   6337.24    378.35 o
   6   1   3    649.42    748.59    171.70 o
   6   1  -3    514.78    516.65    168.12 o
   6   1   4  21590.10  24482.50   1036.81 o
   6   1  -4  20154.40  20637.70    838.72 o
   6   1   5   2335.21   2207.72    282.53 o
   6   1  -5   2260.96   2661.79    296.07 o
   6   1   6  41154.90  40605.40   1770.54 o
   6   1  -6  40416.10  40882.80   1777.81 o
   6   1   7    787.68    337.48    221.16 <
   6   1  -7    729.99    832.04    228.16 o
   6   1   8   3963.32   3736.81    344.28 o
   6   1  -8   3527.87   3969.98    360.78 o
   6   1   9     18.64    131.31    188.97 <
   6   1  -9      7.26    -18.41    192.67 <
   6   1  10  18441.00  16945.10   1221.86 o
   6   1 -10  17742.50  17607.80    880.62 o
   6   1  11    165.67    380.43    212.22 <
   6   1 -11     68.67    713.00    178.69 o
   6   1  12  22460.50  22120.20   1089.15 o
   6   1 -12  24009.10  23527.80    898.02 o
   6   1  13    947.35    438.11    250.68 <
   6   1 -13   1125.66    782.95    250.68 o
   6   1  14    394.97    487.20    240.48 <
   6   1 -14    497.48    805.04    252.57 o
   6   1  15    721.00    883.58    412.25 <
   6   1 -15    703.56    845.54    261.28 o
   6   1  16  11659.00  10477.80    996.24 o
   6   1 -16  10998.70  10785.80    553.35 o
   6   1  17    401.67    748.59    410.97 <
   6   1 -17    560.56    942.49    288.10 o
   6   1  18   7590.80   7587.75    887.27 o
   6   1 -18   7007.23   6593.72    570.72 o
   6   1  19    753.30    573.10    413.64 <
   6   1 -19    638.86    668.82    278.55 <
   6   1  20    286.11    494.56    398.78 <
   6   1 -20    369.48    697.05    294.35 <
   6   1  21    681.85    770.68    406.16 <
   6   1 -21    572.52    465.11    277.40 <
   6   1  22   8179.22   6536.04    902.98 o
   6   1 -22   7558.81   8715.54    682.25 o
   6   1  23    116.85    -45.41    354.66 <
   6   1 -23    112.17   -282.26    255.19 <
   6   2   0      8.68    120.26    152.16 <
   6   2   1  11978.30  12537.00    677.15 o
   6   2  -1  11429.40  12405.70    546.51 o
   6   2   2   2461.38   2717.01    316.05 o
   6   2  -2   3014.28   3187.03    257.15 o
   6   2   3  36501.60  37569.30   1676.17 o
   6   2  -3  39795.30  39102.10   1382.18 o
   6   2   4    502.75    731.41    205.98 o
   6   2  -4    281.85    288.39    154.62 <
   6   2   5   5764.85   6143.34    425.64 o
   6   2  -5   5675.17   5448.75    348.26 o
   6   2   6    732.94    650.41    220.96 <
   6   2  -6    605.50    695.82    325.16 <
   6   2   7  11065.30  10760.00    627.28 o
   6   2  -7  12406.10  11950.40    657.56 o
   6   2   8   2663.70   2361.12    271.94 o
   6   2  -8   1981.49   1624.81    281.62 o
   6   2   9  22361.60  23681.20   1423.95 o
   6   2  -9  19895.90  20219.30   1038.99 o
   6   2  10   2934.63   3362.51    445.88 o
   6   2 -10   3064.74   3828.85    377.28 o
   6   2  11   1181.08   1045.57    255.41 o
   6   2 -11   1628.26   1348.69    214.04 o
   6   2  12   1428.97   1931.60    446.17 o
   6   2 -12   1312.57   1168.29    188.01 o
   6   2  13  15256.50  17362.40   1284.98 o
   6   2 -13  16079.60  16132.70    607.09 o
   6   2  14    762.15   1034.53    439.18 <
   6   2 -14   1044.12   1279.96    226.70 o
   6   2  15  12179.30  13402.20   1094.47 o
   6   2 -15  12877.90  11906.20    712.55 o
   6   2  16     96.52    558.37    424.49 <
   6   2 -16    120.93    467.56    241.62 <
   6   2  17    326.84    705.64    451.48 <
   6   2 -17    365.29    457.74    250.31 <
   6   2  18    461.52    955.98    483.30 <
   6   2 -18    575.60    668.82    262.56 <
   6   2  19  10333.70   9071.43   1051.07 o
   6   2 -19  10027.40  10029.90    654.09 o
   6   2  20    849.83    404.97    438.26 <
   6   2 -20    612.80    706.86    267.46 <
   6   2  21   6468.41   6802.34    912.38 o
   6   2 -21   5967.42   7190.14    609.98 o
   6   2  22     53.82    147.26    438.10 <
   6   2 -22     20.85   -223.35    246.63 <
   6   2  23    236.02    618.51    425.72 <
   6   2 -23    196.60     33.13    274.91 <
   6   3   0  42313.40  43710.20   1535.81 o
   6   3   1    860.90    807.49    234.44 o
   6   3  -1   1146.00   1238.24    230.58 o
   6   3   2   7328.14   7765.69    510.00 o
   6   3  -2   7666.96   7573.02    409.12 o
   6   3   3   3069.47   2955.09    312.00 o
   6   3  -3   2889.86   2553.79    241.52 o
   6   3   4   6344.58   6931.20    512.14 o
   6   3  -4   8406.51   9961.14    525.20 o
   6   3   5   4944.05   4786.06    376.06 o
   6   3  -5   4700.07   4338.13    314.31 o
   6   3   6  32889.10  32315.70   1446.62 o
   6   3  -6  33000.10  33136.70   1480.41 o
   6   3   7   1631.71   1688.62    250.25 o
   6   3  -7   1217.23   1149.88    260.25 o
   6   3   8   1582.77   1606.40    343.58 o
   6   3  -8    877.65    510.51    244.46 <
   6   3   9     55.70    176.72    263.83 <
   6   3  -9     85.22   -152.17    296.97 <
   6   3  10  16265.50  15030.70    777.25 o
   6   3 -10  14460.00  14288.20    652.65 o
   6   3  11   2187.91   2303.44    462.50 o
   6   3 -11   2104.75   2173.36    221.95 o
   6   3  12  15567.70  14862.60   1241.76 o
   6   3 -12  16381.20  16324.10    602.97 o
   6   3  13    849.27    640.60    448.01 <
   6   3 -13   1099.06    840.63    205.25 o
   6   3  14    325.71    158.31    405.00 <
   6   3 -14    361.81     69.95    173.11 <
   6   3  15    232.12    -61.36    396.39 <
   6   3 -15    415.48    390.25    192.68 <
   6   3  16  11159.60  11139.20   1165.89 o
   6   3 -16  11782.50  11546.70    699.32 o
   6   3  17   1404.31   1063.98    505.82 <
   6   3 -17   1635.61   1643.21    304.33 o
   6   3  18  11139.00  10579.60   1116.96 o
   6   3 -18  10828.90   9505.85    671.61 o
   6   3  19    418.19    454.06    431.96 <
   6   3 -19    288.65    679.87    280.82 <
   6   3  20     21.58    295.75    477.35 <
   6   3 -20     53.03     54.00    245.44 <
   6   3  21   1430.07    997.71    529.17 <
   6   3 -21   1198.53    919.17    315.63 <
   6   3  22   5239.25   3133.03    719.68 o
   6   3 -22   4636.11   4754.15    796.26 o
   6   3  23   1001.60    754.72    514.30 <
   6   3 -23    954.74   1124.11    552.15 <
   6   4   0    741.88    747.36    186.53 o
   6   4   1   9296.16   8794.08    577.64 o
   6   4  -1   9131.89   9526.71    461.74 o
   6   4   2   7419.56   7550.93    495.26 o
   6   4  -2   6779.25   6445.23    383.18 o
   6   4   3  27236.30  28089.30   1300.88 o
   6   4  -3  29573.50  29478.50   1076.94 o
   6   4   4   6215.24   6720.12    629.38 o
   6   4  -4   5108.48   5260.98    454.82 o
   6   4   5   7000.31   7669.97    475.82 o
   6   4  -5   6367.51   6245.20    494.97 o
   6   4   6   1299.95   1565.90    246.24 o
   6   4  -6   1537.07   1775.75    291.70 o
   6   4   7   8782.17   8619.82    745.41 o
   6   4  -7   9187.30   8569.50    582.95 o
   6   4   8   2859.99   2902.32    420.85 o
   6   4  -8   3204.90   3271.70    302.93 o
   6   4  -9  18906.60  18431.20    777.40 o
   6   4  10   1019.43    894.62    417.32 <
   6   4 -10   1396.19   1434.59    244.15 o
   6   4  11    423.58    755.95    408.52 <
   6   4 -11    719.85    861.49    228.12 o
   6   4  12    219.52    524.01    407.35 <
   6   4 -12    146.89     47.86    170.59 <
   6   4  13  13531.20  12060.90   1132.15 o
   6   4 -13  13485.00  13150.60    603.29 o
   6   4  14   2315.68   2655.65    596.03 o
   6   4 -14   2294.81   2005.24    329.38 o
   6   4  15  10959.00  11232.50   1128.30 o
   6   4 -15  11954.60  10747.80    705.83 o
   6   4  16   1065.72   1120.43    503.12 <
   6   4 -16   1289.64   1036.98    223.69 o
   6   4  17    290.07    -72.40    450.39 <
   6   4 -17    336.60   -472.47    355.76 <
   6   4  18    677.29    836.95    541.13 <
   6   4 -18    675.13   1336.42    526.09 <
   6   4  19   7209.67   7235.54    958.39 o
   6   4 -19   7689.25   7321.44    957.97 o
   6   4  20   3087.37   2593.06    679.17 o
   6   4 -20   2643.05   2799.23    642.87 o
   6   4  21   5920.09   5675.78    925.71 o
   6   4 -21   5721.70   5719.96    812.41 o
   6   4  22    113.67   -182.85    485.96 <
   6   4 -22     87.57    676.18    475.99 <
   6   5   0  25101.20  26444.80   1224.52 o
   6   5   1   5466.23   5556.74    436.58 o
   6   5  -1   5186.56   5020.45    336.92 o
   6   5   2   7271.70   7822.14    521.87 o
   6   5  -2   7625.59   7618.43    419.73 o
   6   5   3    892.80   1127.79    237.80 o
   6   5  -3   1097.95   1077.48    197.61 o
   6   5   4   8742.56   8954.84    569.76 o
   6   5  -4  10344.90  10458.20    624.14 o
   6   5   5   3428.25   3812.90    476.59 o
   6   5  -5   3290.85   3438.60    375.17 o
   6   5   6  16705.40  15520.30   1192.15 o
   6   5  -6  16550.10  18528.20    911.34 o
   6   5   7   2813.32   2353.76    409.41 o
   6   5  -7   2910.04   2793.10    294.83 o
   6   5   8   1667.34   1617.44    342.45 o
   6   5  -8   1572.29   1570.81    250.35 o
   6   5   9   1921.76   1596.58    467.88 o
   6   5  -9   1965.03   2397.94    281.33 o
   6   5  10  16972.40  15070.00   1160.45 o
   6   5 -10  14427.40  13468.50    657.03 o
   6   5  11   3483.61   4355.31    639.12 o
   6   5 -11   4206.72   4366.36    435.23 o
   6   5  12   9695.60   7483.44    898.81 o
   6   5 -12   9220.40   9253.05    622.06 o
   6   5  13   1445.72   1252.97    511.87 <
   6   5 -13   1138.46    623.41    291.22 <
   6   5  14    369.42   1000.16    500.43 <
   6   5 -14    389.10    757.18    290.63 <
   6   5  15   1028.90    785.41    490.99 <
   6   5 -15    972.87   1146.20    306.64 o
   6   5  16   7941.86   7490.80    992.50 o
   6   5 -16   9261.19   8648.04    664.87 o
   6   5  17   4299.82   2555.02    674.67 o
   6   5 -17   4304.00   4197.01    702.13 o
   6   5  18   6715.76   4684.20    800.09 o
   6   5 -18   6647.50   4744.34    772.99 o
   6   5  19   1103.30    400.07    497.25 <
   6   5 -19   1121.09   1297.15    528.81 <
   6   5  20     21.47    -90.81    485.97 <
   6   5 -20      1.66     29.45    401.29 <
   6   5  21    361.21    239.30    517.89 <
   6   5 -21    409.34    144.81    413.60 <
   6   5  22   6083.81   5009.41    885.32 o
   6   5 -22   5521.84   5148.08    863.33 o
   6   6   0   1313.65   1396.55    269.87 o
   6   6   1   7211.50   7974.31    524.71 o
   6   6  -1   6625.97   6534.81    508.37 o
   6   6   2   7140.61   7874.91    519.92 o
   6   6  -2   7086.39   7053.92    413.71 o
   6   6   3  17796.50  18603.00    917.34 o
   6   6  -3  19236.70  18576.00    766.42 o
   6   6   4   5955.87   6288.15    446.70 o
   6   6  -4   6202.25   6029.21    486.55 o
   6   6   5    348.25    628.32    215.80 <
   6   6  -5    444.90    554.69    252.74 <
   6   6   6    243.27    481.06    293.21 <
   6   6  -6    142.90    833.27    215.47 o
   6   6   7  10024.80   9928.01    806.59 o
   6   6  -7   9856.12   9350.00    516.69 o
   6   6  -8   6862.05   6864.93    452.82 o
   6   6   9  12612.40  11816.70   1029.66 o
   6   6  -9  11079.00  10887.70    577.75 o
   6   6  10   2472.14   2998.04    558.89 o
   6   6 -10   2646.31   2373.40    366.19 o
   6   6  11   2360.70   2713.33    575.13 o
   6   6 -11   2655.55   2460.53    374.64 o
   6   6  12   1855.51    888.49    496.42 <
   6   6 -12   1972.07   1855.52    346.24 o
   6   6  13   4653.35   4689.11    754.67 o
   6   6 -13   4885.75   4048.52    469.62 o
   6   6  14   5952.97   6383.87    858.20 o
   6   6 -14   5689.25   5123.54    525.54 o
   6   6  15   6263.84   4637.57    820.06 o
   6   6 -15   6641.19   6602.31    570.77 o
   6   6  16   1464.38   1965.97    618.12 o
   6   6 -16   1420.76   1508.22    363.15 o
   6   6  17    269.14    353.43    512.95 <
   6   6 -17    315.67    209.85    308.05 <
   6   6  18   1038.25    674.96    519.25 <
   6   6 -18    951.15    970.71    328.87 <
   6   6  19   6398.06   6594.95    959.31 o
   6   6 -19   6084.58   6246.42    859.95 o
   6   6  20   2581.64   3596.91    805.17 o
   6   6 -20   2740.99   2644.61    652.97 o
   6   6  21   3538.62   3460.69    758.50 o
   6   6 -21   3400.53   3363.74    681.14 o
   6   7   0   9975.07   9801.61    624.15 o
   6   7   1   8964.65   8682.40    575.48 o
   6   7  -1   7793.20   7655.24    568.69 o
   6   7   2    739.15    722.82    255.27 <
   6   7  -2    834.85    909.35    267.46 o
   6   7   3     91.04    201.26    224.55 <
   6   7  -3     73.51    357.11    256.41 <
   6   7   4  10368.30   9434.67    866.75 o
   6   7  -4  11011.10  11379.80    694.23 o
   6   7   5   5627.74   5792.36    593.54 o
   6   7  -5   4392.90   4988.55    379.66 o
   6   7   6  17168.60  17480.20   1284.98 o
   6   7  -6  17524.30  19233.80    791.91 o
   6   7  -7   4917.61   4613.03    381.44 o
   6   7   8    546.52    229.49    368.23 <
   6   7  -8    233.29    285.94    224.56 <
   6   7   9   1627.83    790.31    444.78 <
   6   7  -9   1371.11   1183.02    265.31 o
   6   7  10   5385.05   4168.78    662.47 o
   6   7 -10   4299.02   4194.55    476.40 o
   6   7  11   6868.26   6283.24    852.86 o
   6   7 -11   7314.83   8774.44    659.04 o
   6   7  12  11516.40  11665.70   1189.99 o
   6   7 -12  11806.80  11120.80    751.36 o
   6   7  13   2342.07   2032.23    611.43 o
   6   7 -13   2477.02   2445.80    392.75 o
   6   7  14    402.18    634.46    498.17 <
   6   7 -14    332.99    736.32    312.73 <
   6   7  15   1617.66   2291.17    632.65 o
   6   7 -15   1642.64   1543.81    373.18 o
   6   7  16   3045.82   4264.50    809.63 o
   6   7 -16   3488.99   3657.04    495.46 o
   6   7  17   5682.35   4867.06    886.07 o
   6   7 -17   5190.59   6306.56    595.91 o
   6   7  18   3760.25   2384.44    687.52 o
   6   7 -18   3414.90   3552.73    479.57 o
   6   7  19    763.93   1346.23    631.72 <
   6   7 -19    987.48    520.33    549.94 <
   6   7  20    796.47    231.94    537.63 <
   6   7 -20    838.85   1190.38    553.28 <
   6   7  21   1300.81    369.39    583.21 <
   6   7 -21   1444.46   1441.95    603.78 <
   6   8   0   3582.88   3275.38    371.36 o
   6   8   1   3402.91   4646.16    400.26 o
   6   8  -1   3193.13   2633.56    374.19 o
   6   8   2   8465.28   9054.24    595.31 o
   6   8  -2   7742.90   8598.96    622.83 o
   6   8   3   9538.25  10121.90    618.47 o
   6   8  -3   9509.26   9105.79    654.39 o
   6   8   4   5372.74   5592.33    629.04 o
   6   8  -4   5510.34   5729.77    398.01 o
   6   8   5    213.03    333.80    321.50 <
   6   8  -5    343.91    387.79    219.65 <
   6   8   6    349.13    465.11    322.71 <
   6   8  -6    160.45      8.59    216.00 <
   6   8   7   2887.31   3010.31    374.03 o
   6   8  -7   3490.92   3245.93    338.12 o
   6   8   8   8418.06   6250.10    847.85 o
   6   8  -8   9186.73   8784.26    522.17 o
   6   8   9   8564.32   7500.62    909.35 o
   6   8  -9   8105.38   8112.99    639.34 o
   6   8  10   5991.50   4849.87    762.95 o
   6   8 -10   5778.09   5907.72    543.27 o
   6   8  11   1238.05   1050.48    532.71 <
   6   8 -11   1125.25   1062.75    336.30 o
   6   8  12    467.13    742.45    536.20 <
   6   8 -12    647.55    730.18    325.16 <
   6   8  13   3411.25   2986.99    693.88 o
   6   8 -13   4108.10   4031.34    484.91 o
   6   8  14   6723.80   5210.67    875.17 o
   6   8 -14   6358.77   6232.92    602.90 o
   6   8  15   2690.10   1748.75    643.85 <
   6   8 -15   2945.91   3153.89    477.02 o
   6   8  16   1156.18    990.35    595.27 <
   6   8 -16    945.33    921.62    366.95 <
   6   8  17     69.21    251.57    525.22 <
   6   8 -17     54.28    142.35    314.15 <
   6   8  18   1917.41   1369.55    667.93 <
   6   8 -18   1785.90   1667.76    422.28 o
   6   8  19   4188.07   2825.00    780.80 o
   6   8 -19   3999.49   4265.73    803.44 o
   6   8  20   3722.51   2518.20    782.92 o
   6   8 -20   4642.67   5166.49    908.58 o
   6   9   0   4697.41   4939.46    449.68 o
   6   9   1   5553.84   5647.55    458.67 o
   6   9  -1   4246.59   4080.42    442.20 o
   6   9   2   1547.20   1103.25    284.00 o
   6   9  -2   1590.23   1418.64    326.64 o
   6   9   3    720.45    444.24    362.13 <
   6   9  -3    661.70    949.85    297.99 o
   6   9   4   3255.24   3258.20    505.60 o
   6   9  -4   3224.06   3501.19    329.35 o
   6   9   5  11103.70  11559.00    937.33 o
   6   9  -5  10704.60  11005.50    583.88 o
   6   9   6   6298.08   7144.73    539.56 o
   6   9  -6   5411.53   5284.30    428.71 o
   6   9   7   4494.38   5074.45    738.98 o
   6   9  -7   4738.97   4561.48    400.61 o
   6   9   8   1224.90    289.62    426.19 <
   6   9  -8    983.95    955.98    272.46 o
   6   9   9    673.54    877.44    515.34 <
   6   9  -9    958.00   1446.86    348.04 o
   6   9  10   3349.09   2597.97    691.74 o
   6   9 -10   3272.04   4284.14    486.24 o
   6   9  11  10096.60   9505.85   1111.99 o
   6   9 -11  10337.10   9550.03    734.22 o
   6   9  12   3973.72   4047.29    795.12 o
   6   9 -12   4948.22   4952.96    539.95 o
   6   9  13   3467.53   2477.71    712.81 o
   6   9 -13   3149.93   3517.14    490.20 o
   6   9  14    330.98     18.41    536.30 <
   6   9 -14    362.32    478.61    342.35 <
   6   9  15   1257.24   1800.30    668.47 <
   6   9 -15   1216.42   1440.73    404.77 o
   6   9  16   3255.88   2420.03    743.26 o
   6   9 -16   2775.66   3488.92    517.91 o
   6   9  17   4719.48   4224.01    874.43 o
   6   9 -17   4482.63   4135.65    541.92 o
   6   9  18   2351.99   1578.17    691.46 <
   6   9 -18   2010.77   2472.80    460.81 o
   6   9  19    212.00   -643.05    531.22 <
   6   9 -19    514.36     83.45    565.78 <
   6  10   0     91.82   -201.26    256.45 <
   6  10   1    965.54    683.55    281.24 <
   6  10  -1    860.38   1370.78    319.79 o
   6  10   2   7091.96   7348.44    543.96 o
   6  10  -2   6378.93   6980.28    577.36 o
   6  10   3   4586.71   5634.05    456.98 o
   6  10  -3   3973.28   4900.19    383.62 o
   6  10   4   7235.13   7704.33    757.16 o
   6  10  -4   7074.13   6921.38    459.59 o
   6  10   5   1530.26   1489.81    325.26 o
   6  10  -5   1432.26   1476.32    287.10 o
   6  10   6    560.85    267.53    278.68 <
   6  10  -6    416.26    670.05    256.33 <
   6  10   7   1775.23   1790.48    353.41 o
   6  10  -7   1545.61   1633.40    302.99 o
   6  10   8   7823.95   7026.92    969.86 o
   6  10  -8   8137.28   8283.57    534.46 o
   6  10   9   3230.66   4444.90    807.10 o
   6  10  -9   3479.02   3729.45    393.31 o
   6  10  10   5335.50   4586.03    816.04 o
   6  10 -10   5585.95   4951.73    545.25 o
   6  10  11     51.00    390.25    554.65 <
   6  10 -11     91.44   -290.85    315.34 <
   6  10  12    863.77    533.83    565.84 <
   6  10 -12   1171.66    955.98    398.99 <
   6  10  13   2507.26   1773.30    698.84 <
   6  10 -13   2522.63   2967.36    482.82 o
   6  10  14   6910.71   5380.02    936.47 o
   6  10 -14   6808.50   7669.97    698.30 o
   6  10  15   2860.80   2929.31    776.75 o
   6  10 -15   2817.18   2075.19    466.09 o
   6  10  16    925.58    223.35    585.52 <
   6  10 -16   1076.47   1217.38    428.19 <
   6  10  17    207.59    656.55    597.54 <
   6  10 -17    191.72    202.49    375.52 <
   6  10  18   1544.22   1119.20    649.41 <
   6  10 -18   1344.89   1071.34    417.45 <
   6  11   0   3231.39   3783.44    430.74 o
   6  11   1   6870.51   6739.75    536.72 o
   6  11  -1   6305.43   6648.94    563.45 o
   6  11   2   1047.28   1330.28    312.64 o
   6  11  -2    985.77   1057.84    346.01 o
   6  11   3      3.34   -235.62    359.54 <
   6  11  -3     22.63   -206.17    222.09 <
   6  11   4    288.08    285.94    304.35 <
   6  11  -4    128.77    215.99    240.51 <
   6  11   5   8536.24   7958.36    605.86 o
   6  11  -5   7631.04   6857.57    498.74 o
   6  11   6   1781.82   1596.58    359.80 o
   6  11  -6   1718.70   1618.67    308.17 o
   6  11   7   5281.73   4946.82    518.75 o
   6  11  -7   5718.33   5742.05    460.12 o
   6  11   8    287.27   1063.98    586.32 <
   6  11  -8    372.82    328.89    270.00 <
   6  11   9    765.37     65.04    563.38 <
   6  11  -9    795.72   1396.55    317.24 o
   6  11  10   1022.77   1132.70    640.55 <
   6  11 -10   1134.04    770.68    386.79 <
   6  11  11   6430.46   5758.00    962.01 o
   6  11 -11   6732.81   8147.35    702.76 o
   6  11  12   1370.44    560.83    620.02 <
   6  11 -12   1183.93   1356.05    414.65 o
   6  11  13   1930.68   1682.48    697.21 <
   6  11 -13   1585.38   1527.86    444.30 o
   6  11  14     46.60    533.83    660.16 <
   6  11 -14     49.58    767.00    409.64 <
   6  11  15   2271.97   1381.82    687.81 <
   6  11 -15   1944.02   1558.54    455.67 o
   6  11  16   1624.52   2092.37    765.45 <
   6  11 -16   1545.10   1502.09    451.65 o
   6  11 -17   4327.00   3695.08    856.12 o
   6  12   0      3.52    235.62    296.95 <
   6  12   1    470.96    244.21    297.05 <
   6  12  -1    563.96    913.03    340.94 <
   6  12   2   8591.72   9422.40    676.88 o
   6  12  -2   7986.71   8436.97    669.79 o
   6  12   3   1653.09   2162.32    395.70 o
   6  12  -3   1543.26   1914.42    304.99 o
   6  12   4   6430.47   6672.26    584.65 o
   6  12  -4   6149.66   6952.06    484.25 o
   6  12   5    774.31    905.67    339.84 <
   6  12  -5    713.98   1135.16    294.15 o
   6  12   6    199.49    262.62    303.10 <
   6  12  -6     74.93    294.53    265.02 <
   6  12   7    118.23    204.94    548.55 <
   6  12  -7     96.54    127.63    281.02 <
   6  12   8   5680.95   5865.99    583.65 o
   6  12  -8   6359.02   6202.24    508.57 o
   6  12   9    920.95   1038.21    612.32 <
   6  12  -9   1132.66   1092.20    325.24 o
   6  12  10   2346.09   1722.98    737.98 <
   6  12 -10   2688.10   3352.70    525.41 o
   6  12  11     77.15    742.45    613.45 <
   6  12 -11     73.31   1104.48    408.14 <
   6  12  12   1789.17   1255.42    662.99 <
   6  12 -12   1819.11   1597.81    467.77 o
   6  12  13   1069.31   1319.23    723.93 <
   6  12 -13   1060.31   1354.82    447.71 o
   6  12  14   6053.60   4870.74    998.15 o
   6  12 -14   5674.35   5232.76    651.39 o
   6  12  15    795.90   1143.75    732.51 <
   6  12 -15    652.19    136.22    402.62 <
   6  13   0    227.40    289.62    260.15 <
   6  13   1   6295.74   7611.06    621.84 o
   6  13  -1   5662.84   5767.82    578.96 o
   6  13   2    136.61    338.71    314.11 <
   6  13  -2     83.95   -160.76    317.83 <
   6  13   3      2.83    348.52    309.18 <
   6  13  -3     19.29    -71.18    252.80 <
   6  13   4     54.43   -114.13    325.20 <
   6  13  -4     11.05     57.68    260.16 <
   6  13   5   5235.63   6358.10    605.74 o
   6  13  -5   5446.63   6468.54    501.05 o
   6  13   6    578.63    575.55    352.21 <
   6  13  -6    771.50    692.14    305.62 <
   6  13   7   3501.29   4129.51    512.92 o
   6  13  -7   3532.80   3351.47    409.06 o
   6  13   8    337.48    688.46    631.92 <
   6  13  -8    345.44    168.13    303.15 <
   6  13   9    842.17   1133.93    635.56 <
   6  13  -9    796.52    801.36    342.38 <
   6  13  10    462.90    667.59    649.14 <
   6  13 -10    536.65    294.53    324.05 <
   6  13  11   5806.22   6549.54   1044.37 o
   6  13 -11   5713.39   5965.40    679.28 o
   6  13  12    949.33   2440.89    813.91 <
   6  13 -12    780.29    975.62    433.09 <
   6  13  13   1264.67    771.91    677.59 <
   6  13 -13   1116.97    579.24    422.41 <
   6  14   0    463.09    462.65    271.21 <
   6  14   1      6.41   -142.35    316.61 <
   6  14  -1      3.72   -246.67    250.30 <
   6  14   2   4902.40   5694.18    560.01 o
   6  14  -2   4940.31   4804.47    444.64 o
   6  14   3    285.89     46.63    335.05 <
   6  14  -3    170.53    106.77    268.76 <
   6  14   4   4743.54   4417.90    539.47 o
   6  14  -4   5325.41   5598.46    463.01 o
   6  14   5    296.47    234.39    362.03 <
   6  14  -5    346.07    358.34    298.20 <
   6  14   6     91.82    368.16    380.38 <
   6  14  -6     94.81     22.09    293.30 <
   6  14   7    351.73     34.36    381.69 <
   6  14  -7    294.16    192.67    303.14 <
   6  14   8   5238.95   5241.35    930.21 o
   6  14  -8   5139.52   5983.80    522.79 o
   6  14   9    542.44     76.09    641.87 <
   6  14  -9    569.32    179.17    320.40 <
   6  14  10   1633.78   2315.72    749.31 o
   6  14 -10   1576.26   2053.10    393.32 o
   6  15   0     48.13    -96.95    359.56 <
   6  15   1   4303.09   4610.57    555.25 o
   6  15  -1   3960.68   4194.55    424.00 o
   6  15   2     38.81   -312.93    336.20 <
   6  15  -2     21.55   -139.90    273.65 <
   6  15   3    118.64    -77.31    354.66 <
   6  15  -3    100.54   -257.71    276.07 <
   6  15   4    226.31     72.40    376.76 <
   6  15  -4    222.71    755.95    313.90 <
   6  15   5   4631.29   4628.98    565.74 o
   6  15  -5   4582.53   4433.86    404.19 o
   6  15   6     18.64     54.00    371.84 <
   6  15  -6      8.27   -255.26    300.62 <
   6  15   7   2166.00   2988.22    744.11 o
   6  15  -7   2327.73   2168.45    567.13 o
   7   0   1  30836.10  32951.40   1492.40 o
   7   0   2  16103.70  16727.90    864.45 o
   7   0   3     10.52   -148.49    217.20 <
   7   0   4   3234.07   3383.38    367.80 o
   7   0   5   9490.49  10103.50    629.44 o
   7   0   6   2162.72   2486.30    322.12 o
   7   0   7   5679.68   4957.87    428.18 o
   7   0   8  12888.80  13832.90    758.84 o
   7   0   9    553.56    598.87    242.96 <
   7   0  10  14932.30  14749.70    793.68 o
   7   0  11  12230.20  11836.30    980.59 o
   7   0  12   1214.46   1113.07    223.49 o
   7   0  13   5318.59   5219.26    450.69 o
   7   0  14   7221.79   8142.44    595.65 o
   7   0  15   5095.79   4663.34    455.28 o
   7   0  16     91.04    391.48    268.67 <
   7   0  17   9303.80   8992.88    663.82 o
   7   0  18    215.44    233.17    269.98 <
   7   0  19   2016.02   3371.10    646.33 o
   7   0  20   3633.47   3061.85    604.60 o
   7   0  21   1580.74   1157.24    456.84 <
   7   0  22    197.56    281.03    379.19 <
   7   1   0      2.16     79.77    223.35 <
   7   1   1   6784.06   7366.85    551.45 o
   7   1  -1   6161.11   9605.25    560.64 o
   7   1   2  17057.50  17482.60    917.03 o
   7   1  -2  17426.30  18271.70    920.91 o
   7   1   3   4013.32   4492.76    402.37 o
   7   1  -3   4332.37   4266.96    419.88 o
   7   1   4  11564.50  11703.80    684.14 o
   7   1  -4  11670.60  12121.00    701.14 o
   7   1   5  12027.90  11654.70    698.73 o
   7   1  -5  11220.60  13347.00    711.59 o
   7   1   6   1329.44   2011.37    292.19 o
   7   1  -6   1395.44   1434.59    285.88 o
   7   1   7   4617.51   4113.56    399.06 o
   7   1  -7   4624.75   4578.66    408.79 o
   7   1   8  13545.30  12831.60    722.59 o
   7   1  -8  12882.40  12507.60    725.79 o
   7   1   9    108.14    555.92    228.04 <
   7   1  -9     64.79    214.76    227.00 <
   7   1  10   5139.46   5481.88    430.84 o
   7   1 -10   5262.69   5970.30    468.94 o
   7   1  11  12687.60  14709.20   1034.60 o
   7   1 -11  12441.00  12114.90    742.66 o
   7   1  12   1996.91   2091.14    321.36 o
   7   1 -12   2145.16   2157.41    252.77 o
   7   1  13   2972.88   3187.03    373.82 o
   7   1 -13   3228.77   3333.06    375.28 o
   7   1  14  11705.70  12338.20    749.55 o
   7   1 -14  12751.50  13426.70    763.89 o
   7   1  15   3449.57   3555.18    398.59 o
   7   1 -15   3269.42   2934.22    394.62 o
   7   1  16   2200.85   2692.47    545.49 o
   7   1 -16   2343.03   2459.30    364.27 o
   7   1  17   1804.59   2300.99    562.78 o
   7   1 -17   1774.94   1637.08    340.11 o
   7   1  18   2104.44   1961.06    354.88 o
   7   1 -18   1806.47   1715.62    335.15 o
   7   1  19    347.42    -25.77    390.27 <
   7   1 -19    331.95    728.95    285.71 <
   7   1  20   5759.62   5697.87    818.65 o
   7   1 -20   5132.08   5411.93    520.80 o
   7   1  21   1648.55   1981.92    570.35 o
   7   1 -21   1756.25   1437.05    478.88 o
   7   1  22   1077.20    404.97    435.91 <
   7   1 -22    938.00   1281.19    435.41 <
   7   2   0    367.09    506.83    236.78 <
   7   2   1  12864.40  14538.60    796.01 o
   7   2  -1  13969.60  15398.80    810.32 o
   7   2   2  19873.80  20096.50   1010.03 o
   7   2  -2  18774.60  20772.70   1014.20 o
   7   2   3    259.00    186.53    235.64 <
   7   2  -3    168.62    509.29    242.84 <
   7   2   4   5837.16   6555.68    495.81 o
   7   2  -4   5633.75   6866.16    508.82 o
   7   2   5  10822.70  10789.50    610.07 o
   7   2  -5   9238.60   8940.12    491.12 o
   7   2   6   1078.83    795.22    248.16 o
   7   2  -6    780.17    473.70    246.86 <
   7   2   7  11048.60  10670.50    608.03 o
   7   2  -7   8786.90   8023.40    605.34 o
   7   2   8   9421.83   8873.85    564.41 o
   7   2  -8   8472.46   8016.04    583.40 o
   7   2   9    817.12   1286.10    262.08 o
   7   2  -9   1139.20    884.81    273.90 o
   7   2  10   4900.39   4212.96    569.62 o
   7   2 -10   5285.04   6588.81    486.50 o
   7   2  11  10962.00   9872.78    896.72 o
   7   2 -11  12583.90  11730.80    698.52 o
   7   2  12   2968.22   3178.44    362.77 o
   7   2 -12   2833.39   3123.21    299.88 o
   7   2  13   3218.48   3398.10    402.12 o
   7   2 -13   4366.78   4663.34    349.95 o
   7   2  14   7289.72   7528.84    594.39 o
   7   2 -14   7699.37   8681.18    486.40 o
   7   2  15   2422.45   2897.41    595.84 o
   7   2 -15   2495.22   3232.43    383.81 o
   7   2  16    926.41   1480.00    502.77 <
   7   2 -16   1277.01   1140.06    305.71 o
   7   2  17   8081.85   7844.23    970.00 o
   7   2 -17   7721.59   8594.05    609.21 o
   7   2  18   1253.93    406.20    455.63 <
   7   2 -18   1032.00   1148.65    305.46 o
   7   2  19   1315.64   1191.61    555.99 <
   7   2 -19   1033.97    960.89    321.58 <
   7   2  20   3033.05   2798.00    688.72 o
   7   2 -20   3106.16   3303.61    425.44 o
   7   2  21   1683.99   1682.48    527.70 o
   7   2 -21   1471.14   1572.04    358.23 o
   7   2  22   1387.50   1553.63    539.84 <
   7   2 -22   1233.07   1011.21    332.76 o
   7   3   0    164.03    115.36    218.45 <
   7   3   1  15752.10  16525.40    855.12 o
   7   3  -1  15150.50  16120.40    859.20 o
   7   3   2   9674.82  10171.00    611.44 o
   7   3  -2   8682.39   8857.89    616.61 o
   7   3   3    883.35    873.76    250.36 o
   7   3  -3    882.78    806.27    260.23 o
   7   3   4  10182.60  10909.80    626.26 o
   7   3  -4   9762.35   9908.37    647.37 o
   7   3   5   2986.32   3217.71    350.42 o
   7   3  -5   3087.79   3177.21    283.22 o
   7   3   6   3742.35   3518.37    373.64 o
   7   3  -6   3910.15   4092.70    405.72 o
   7   3   7   5323.58   4706.29    405.74 o
   7   3  -7   5192.17   5188.58    457.76 o
   7   3   8  16424.70  16440.70    827.04 o
   7   3  -8  15882.60  15366.90    867.64 o
   7   3   9   2856.48   4319.73    510.04 o
   7   3  -9   3307.26   3443.51    396.07 o
   7   3  10   4107.18   3609.18    527.42 o
   7   3 -10   4106.56   4979.96    451.65 o
   7   3  11   6567.89   6097.93    494.92 o
   7   3 -11   6954.72   6401.05    524.64 o
   7   3  12   1657.15   1989.28    322.24 o
   7   3 -12   1636.97   1730.34    251.41 o
   7   3  13   2225.76   1428.45    486.71 <
   7   3 -13   2147.66   2066.60    272.60 o
   7   3  14   8752.85   8290.93   1003.66 o
   7   3 -14  10310.10  10229.90    541.60 o
   7   3  15   3233.94   3876.71    681.40 o
   7   3 -15   3892.57   4232.60    349.91 o
   7   3  16   2110.24   1675.12    553.85 o
   7   3 -16   2249.28   1941.42    331.85 o
   7   3  17   5222.68   4422.81    764.63 o
   7   3 -17   4968.44   4986.09    409.83 o
   7   3  18   2820.00   2930.54    699.38 o
   7   3 -18   2943.82   2721.92    329.39 o
   7   3  19   2167.80   2288.72    656.44 o
   7   3 -19   2022.15   1611.31    297.62 o
   7   3  20   4517.58   4146.69    779.81 o
   7   3 -20   3663.51   3787.12    382.56 o
   7   3  21    734.74    827.13    500.66 <
   7   3 -21    406.74    470.02    352.18 <
   7   3 -22    543.57    623.41    492.08 <
   7   4   0   1369.02   1538.90    295.53 o
   7   4   1   5045.57   5334.62    470.39 o
   7   4  -1   5285.77   7379.12    513.11 o
   7   4   2  11797.20  11811.80    711.71 o
   7   4  -2  13077.00  12939.50    732.06 o
   7   4   3   1596.53   1853.06    297.80 o
   7   4  -3   1570.38   1492.27    301.99 o
   7   4   4   6130.96   6793.75    477.41 o
   7   4  -4   5513.59   5267.12    371.56 o
   7   4   5  14899.60  15564.50    837.39 o
   7   4  -5  16995.30  16666.50    704.05 o
   7   4   6   3934.97   4454.72    381.33 o
   7   4  -6   3219.15   3337.97    402.26 o
   7   4   7  18238.40  17132.90    882.09 o
   7   4  -7  18310.60  17514.50    934.26 o
   7   4   8   7647.81   6972.92    727.06 o
   7   4  -8   8383.23   8445.56    597.41 o
   7   4   9    749.63    984.21    343.45 <
   7   4  -9    447.59   1293.46    308.51 o
   7   4  10   1472.43   3047.13    427.05 o
   7   4 -10   1690.77   1287.33    324.45 o
   7   4  11  11215.50  10510.90    658.40 o
   7   4 -11  10100.70   9991.82    698.69 o
   7   4  12   2270.93   1192.83    463.62 <
   7   4 -12   2483.64   2567.29    289.42 o
   7   4  13   2593.07   2092.37    569.95 o
   7   4 -13   3221.53   3167.39    278.74 o
   7   4  14   6170.12   6540.95    831.28 o
   7   4 -14   5831.82   5462.25    354.99 o
   7   4  15   3361.79   3870.57    715.98 o
   7   4 -15   3944.83   3870.57    311.95 o
   7   4  16   1280.63    828.36    543.86 <
   7   4 -16   1118.97    890.94    264.07 o
   7   4  17   4672.20   4350.41    771.17 o
   7   4 -17   4691.28   4278.00    387.82 o
   7   4  18   1452.43    542.42    531.76 <
   7   4 -18   1405.95    946.17    356.27 <
   7   4  19   2563.14   1736.48    626.58 <
   7   4 -19   2116.67   2637.24    432.41 o
   7   4  20   3353.16   3738.04    791.07 o
   7   4 -20   3583.76   3882.84    511.15 o
   7   4  21   2069.88   1346.23    587.12 <
   7   4 -21   1727.20   2917.04    657.79 o
   7   5   0   2382.28   2761.19    346.53 o
   7   5   1  11102.80  10502.30    687.27 o
   7   5  -1  10593.50  12351.70    696.53 o
   7   5   2   8426.86   8867.71    608.23 o
   7   5  -2  10063.90  10128.00    639.10 o
   7   5   3   3226.15   3395.65    361.61 o
   7   5  -3   2971.27   2855.68    367.17 o
   7   5   4   5881.98   6326.19    499.23 o
   7   5  -4   7428.45   7620.88    438.45 o
   7   5   5   6135.07   6518.86    468.62 o
   7   5  -5   5216.46   5388.61    494.06 o
   7   5   6   3369.75   3769.94    364.64 o
   7   5  -6   3679.74   3945.43    420.28 o
   7   5   7   7224.29   7033.05    747.85 o
   7   5  -7   8580.35   8569.50    613.64 o
   7   5   8  14271.50  12846.30   1008.88 o
   7   5  -8  13682.10  13158.00    807.35 o
   7   5   9   7772.44   8255.34    722.60 o
   7   5  -9   7272.03   6610.90    573.97 o
   7   5  10   6613.10   5346.89    748.74 o
   7   5 -10   6736.91   6245.20    553.76 o
   7   5  11   4693.83   4620.39    726.63 o
   7   5 -11   4879.92   5301.48    412.16 o
   7   5  12   2759.44   2390.58    544.10 o
   7   5 -12   1955.96   1611.31    295.07 o
   7   5  13   1543.38   1352.37    522.92 <
   7   5 -13   1760.95   1043.12    273.34 o
   7   5  14   5087.98   4469.44    794.97 o
   7   5 -14   5942.70   6122.48    460.80 o
   7   5  15   2515.17   2930.54    660.99 o
   7   5 -15   2804.40   2595.52    339.14 o
   7   5  16   4074.56   3766.26    740.43 o
   7   5 -16   3571.15   3790.81    394.61 o
   7   5  17   4624.37   2402.85    680.16 o
   7   5 -17   4719.73   4190.87    411.38 o
   7   5  18   2722.54   1392.87    630.58 <
   7   5 -18   3437.53   3320.79    648.12 o
   7   5  19   1893.83   2017.51    693.27 <
   7   5 -19   1504.11   2213.86    605.62 o
   7   5  20   3173.36   2656.88    728.26 o
   7   5 -20   3084.99   3519.59    698.94 o
   7   5  21   1767.39   1546.27    634.61 <
   7   5 -21   1625.62   1656.71    608.67 <
   7   6   0   2468.26   3033.63    368.22 o
   7   6   1   5668.82   6019.39    506.97 o
   7   6  -1   6893.32   7553.39    546.20 o
   7   6   2   4332.82   4436.31    419.41 o
   7   6  -2   4532.10   4552.89    442.96 o
   7   6   3   3196.95   3229.98    360.72 o
   7   6  -3   3585.52   3112.17    393.75 o
   7   6   4   7632.60   8311.79    558.21 o
   7   6  -4   7129.29   7333.72    577.32 o
   7   6   5  10033.80  11117.20    667.87 o
   7   6  -5  11579.80  12492.80    747.08 o
   7   6   6   4453.52   5351.80    615.32 o
   7   6  -6   5198.38   5019.23    493.82 o
   7   6   7   5359.58   5804.63    635.86 o
   7   6  -7   5328.27   5246.26    516.87 o
   7   6   8   7288.86   8416.10    737.96 o
   7   6  -8   6131.76   6536.04    578.04 o
   7   6   9   1722.46   1683.71    403.79 o
   7   6  -9   1415.83    976.85    330.51 <
   7   6  10   4134.57   2926.86    631.25 o
   7   6 -10   4333.36   4289.05    383.02 o
   7   6  11   6815.62   7467.48    858.80 o
   7   6 -11   5242.21   6306.56    463.93 o
   7   6  12   2420.43   1491.04    545.69 <
   7   6 -12   2275.84   2179.50    326.61 o
   7   6  13   2608.01   2093.59    607.97 o
   7   6 -13   2606.82   2650.74    345.98 o
   7   6  14   3625.27   3452.10    713.23 o
   7   6 -14   3386.41   3420.19    382.80 o
   7   6  15   4793.75   3021.35    716.61 o
   7   6 -15   5149.06   4729.61    430.78 o
   7   6  16   3018.11   2844.64    683.74 o
   7   6 -16   2670.25   2707.19    423.32 o
   7   6  17   3826.21   3934.39    771.76 o
   7   6 -17   3980.25   4200.69    512.49 o
   7   6  18   1530.01   1707.03    639.25 <
   7   6 -18   1841.12   1327.82    385.87 o
   7   6  19   2131.05    660.23    611.88 <
   7   6 -19   1893.98   1541.36    593.00 <
   7   6  20   2260.98   2701.06    727.32 o
   7   6 -20   2031.29   1331.51    600.59 <
   7   7   0   2266.53   2283.81    342.36 o
   7   7   1   2209.71   2702.28    363.56 o
   7   7  -1   2986.64   2930.54    375.64 o
   7   7   2   3675.93   3718.40    401.19 o
   7   7  -2   4335.14   4620.39    449.62 o
   7   7   3   4615.61   4797.10    447.41 o
   7   7  -3   5237.22   6143.34    511.44 o
   7   7   4   4583.22   4047.29    410.13 o
   7   7  -4   5356.94   5009.41    482.05 o
   7   7   5   9606.52  10245.90    637.92 o
   7   7  -5  10173.20  10847.20    720.17 o
   7   7   6   5507.11   5172.63    624.17 o
   7   7  -6   5631.65   5132.13    507.00 o
   7   7   7   4327.69   4242.41    585.54 o
   7   7  -7   4885.88   5303.94    514.30 o
   7   7   8   5157.60   4551.67    597.70 o
   7   7  -8   5220.36   5335.84    416.86 o
   7   7   9   3995.91   3660.72    418.05 o
   7   7  -9   3750.38   3544.14    367.47 o
   7   7  10   3035.57   2553.79    369.10 o
   7   7 -10   3199.40   3512.23    364.93 o
   7   7  11   3310.19   2167.23    590.37 o
   7   7 -11   3460.53   4166.33    401.91 o
   7   7  12   1658.65   1510.68    544.99 <
   7   7 -12   1614.77   1189.15    290.14 o
   7   7  13   3832.84   2946.50    704.27 o
   7   7 -13   3413.50   3161.25    374.88 o
   7   7  14   3942.15   3518.37    741.78 o
   7   7 -14   4246.58   4128.28    423.69 o
   7   7  15   2794.35   1454.23    604.90 <
   7   7 -15   2089.98   1981.92    398.98 o
   7   7  16   2756.96   1208.79    627.01 <
   7   7 -16   2465.07   3745.40    482.40 o
   7   7  17   2352.48   1282.42    582.49 <
   7   7 -17   2294.61   2042.05    427.40 o
   7   7  18   2473.12   2354.99    706.97 o
   7   7 -18   2715.62   3097.44    474.29 o
   7   7  19   1159.40   1331.51    666.28 <
   7   7 -19   1510.61   1703.35    412.13 o
   7   8   0   8254.37   8910.66    634.52 o
   7   8   1   5423.85   5739.59    492.37 o
   7   8  -1   5615.99   5958.03    513.16 o
   7   8   2   2021.00   2127.96    339.76 o
   7   8  -2   1932.94   2368.49    356.39 o
   7   8   3   2097.14   2148.82    321.43 o
   7   8  -3   2418.02   1637.08    356.99 o
   7   8   4   4964.34   5391.07    446.59 o
   7   8  -4   4572.02   4687.88    489.36 o
   7   8   5   3266.00   3243.48    522.82 o
   7   8  -5   3634.81   3579.73    437.00 o
   7   8   6   3716.83   3244.70    530.96 o
   7   8  -6   4735.76   4468.22    487.86 o
   7   8   7   5682.73   6428.05    696.51 o
   7   8  -7   5055.17   5575.15    553.34 o
   7   8   8   3855.15   4165.10    439.80 o
   7   8  -8   4062.43   4522.21    401.19 o
   7   8   9   2563.21   2798.00    393.50 o
   7   8  -9   2674.66   2622.52    346.17 o
   7   8  10   2694.02   2953.86    626.78 o
   7   8 -10   2184.91   2817.64    362.04 o
   7   8  11   5951.37   4075.51    760.28 o
   7   8 -11   6207.15   6148.25    472.67 o
   7   8  12   3577.16   4795.88    798.35 o
   7   8 -12   2974.08   3063.08    385.15 o
   7   8  13   1452.41    798.90    545.20 <
   7   8 -13   1498.66   1310.64    313.15 o
   7   8  14    959.46    616.05    563.40 <
   7   8 -14   1143.17    673.73    294.88 <
   7   8  15   2521.26   1834.66    692.68 <
   7   8 -15   2214.74   1823.61    412.83 o
   7   8  16   3656.60   4419.13    832.25 o
   7   8 -16   3313.52   4437.54    542.64 o
   7   8  17   2464.47   1802.75    729.44 <
   7   8 -17   2234.99   1911.97    436.05 o
   7   8  18   3411.16    431.97    644.81 <
   7   8 -18   3666.27   2697.37    453.33 o
   7   8 -19   2399.37   2075.19    640.89 o
   7   9   0   2013.85   1851.84    348.76 o
   7   9   1   3258.91   3347.79    413.38 o
   7   9  -1   3756.58   4111.10    440.93 o
   7   9   2   2278.33   2287.49    355.87 o
   7   9  -2   2038.01   2202.81    378.95 o
   7   9   3   7518.14   7543.57    563.19 o
   7   9  -3   7064.91   7332.49    609.07 o
   7   9   4   3619.11   4884.24    619.76 o
   7   9  -4   3699.75   3616.54    460.37 o
   7   9   5   3094.60   3025.04    527.80 o
   7   9  -5   3482.45   3163.71    441.19 o
   7   9   6   4624.39   4598.30    612.42 o
   7   9  -6   4879.25   4206.82    496.16 o
   7   9   7   2685.46   3367.42    424.49 o
   7   9  -7   2216.19   2211.41    328.90 o
   7   9   8   4107.27   3395.65    437.23 o
   7   9  -8   3950.45   4151.60    404.43 o
   7   9   9   1805.79   1889.88    591.44 o
   7   9  -9   2328.33   2701.06    365.00 o
   7   9  10   4579.36   4030.11    773.93 o
   7   9 -10   5039.73   4507.49    438.40 o
   7   9  11   1135.08    661.46    575.73 <
   7   9 -11   1251.98    914.26    307.10 <
   7   9  12   4346.88   3334.29    779.32 o
   7   9 -12   4399.54   4857.24    462.64 o
   7   9  13   3556.73   3410.37    803.98 o
   7   9 -13   3644.65   3940.52    434.96 o
   7   9  14   2368.97   2108.32    700.95 o
   7   9 -14   2860.09   3153.89    414.21 o
   7   9  15   3624.23   2692.47    754.49 o
   7   9 -15   3088.54   3598.14    519.43 o
   7   9  16   1699.22    986.66    632.37 <
   7   9 -16   1806.29    616.05    388.62 <
   7   9  17   2049.26   1558.54    669.16 <
   7   9 -17   1817.53   2235.95    459.69 o
   7   9 -18    738.06    968.26    641.74 <
   7  10   0   8853.04   9957.46    691.75 o
   7  10   1   1786.67   1925.47    363.06 o
   7  10  -1   1909.33   2226.13    383.64 o
   7  10   2   3251.08   2959.99    387.18 o
   7  10  -2   2489.79   1867.79    386.23 o
   7  10   3   2072.09   2239.63    343.33 o
   7  10  -3   2294.50   2547.66    400.88 o
   7  10   4   4729.80   4671.93    633.35 o
   7  10  -4   4421.23   4824.10    525.51 o
   7  10   5   2178.89   2099.73    498.33 o
   7  10  -5   1887.32   1423.55    373.59 o
   7  10   6   3764.88   3863.21    455.07 o
   7  10  -6   3761.71   3688.95    487.34 o
   7  10   7   3783.03   3886.53    451.37 o
   7  10  -7   3726.92   3469.28    384.75 o
   7  10   8   2244.21   1492.27    611.72 <
   7  10  -8   2374.40   2369.71    352.21 o
   7  10   9   5046.38   4714.88    518.70 o
   7  10  -9   4975.15   5323.57    466.52 o
   7  10  10   1720.19   1190.38    635.99 <
   7  10 -10   2369.20   2281.36    364.62 o
   7  10  11   1624.12   1492.27    657.86 <
   7  10 -11   1953.71   1996.65    361.96 o
   7  10  12   3646.55   2033.46    714.55 <
   7  10 -12   3419.77   3407.92    418.50 o
   7  10  13   1532.25   1805.20    662.50 <
   7  10 -13   1648.96   1746.30    361.90 o
   7  10  14   1093.96   -211.08    549.92 <
   7  10 -14   1146.51   1589.22    355.41 o
   7  10  15   1508.85   1245.60    686.14 <
   7  10 -15   1482.60   1535.22    444.20 o
   7  10  16   3974.23   2529.25    793.01 o
   7  10 -16   3579.78   2535.39    494.96 o
   7  11   0   3054.12   3025.04    417.30 o
   7  11   1   2369.32   2688.78    403.20 o
   7  11  -1   2215.78   2578.34    400.70 o
   7  11   2   1620.78   1632.17    343.60 o
   7  11  -2   1593.29   1601.49    380.42 o
   7  11   3   6775.50   7300.58    773.07 o
   7  11  -3   5286.57   4844.97    541.05 o
   7  11   4   1979.81   2472.80    528.35 o
   7  11  -4   1714.95   1538.90    395.35 o
   7  11   5   1342.23   1607.63    371.55 o
   7  11  -5   1306.87   1930.38    414.10 o
   7  11   6   3392.02   3526.96    463.61 o
   7  11  -6   3171.44   3803.08    393.62 o
   7  11   7   3295.79   2802.91    429.20 o
   7  11  -7   3313.97   2888.82    375.21 o
   7  11   8   1264.56   1329.05    371.78 o
   7  11  -8   1596.67   1699.67    341.03 o
   7  11   9   3564.95   3130.57    811.64 o
   7  11  -9   3999.92   4536.94    444.07 o
   7  11  10   1809.87   1686.17    684.86 <
   7  11 -10   1775.35   2595.52    387.71 o
   7  11  11    460.89      9.82    606.27 <
   7  11 -11    383.49    606.23    316.52 <
   7  11  12   2451.28   2208.95    730.38 o
   7  11 -12   2538.55   2347.62    388.11 o
   7  11  13   1974.89   1881.29    738.84 <
   7  11 -13   2059.34   2449.48    401.92 o
   7  11  14    534.73   1439.50    699.11 <
   7  11 -14    475.19    144.81    322.82 <
   7  11  15   2657.88   1181.79    758.05 <
   7  11 -15   2567.55   1773.30    399.92 o
   7  12   0   5091.74   4906.33    512.22 o
   7  12   1   1522.86   1870.25    370.17 o
   7  12  -1   1481.86   1602.72    377.84 o
   7  12   2    677.02    528.92    433.25 <
   7  12  -2    476.09   1083.61    371.46 <
   7  12   3   3990.00   3985.93    490.89 o
   7  12  -3   3492.42   3837.44    506.15 o
   7  12   4   2870.92   2475.25    431.38 o
   7  12  -4   2478.72   2454.39    459.01 o
   7  12   5   1092.54    952.30    358.45 <
   7  12  -5   1037.85   1722.98    432.57 o
   7  12   6   2986.77   3087.62    468.61 o
   7  12  -6   2602.74   3643.54    402.71 o
   7  12   7    516.95    611.14    364.44 <
   7  12  -7    684.01    906.90    312.78 <
   7  12   8    499.42    498.24    373.07 <
   7  12  -8    487.29    633.23    320.23 <
   7  12   9   2212.04   2059.23    763.43 <
   7  12  -9   2295.53   2656.88    393.31 o
   7  12  10   1636.27    832.04    669.17 <
   7  12 -10   1760.75   2405.30    385.59 o
   7  12  11    646.23    298.21    661.52 <
   7  12 -11    510.80    639.37    332.51 <
   7  12  12   2292.70   1250.51    689.10 <
   7  12 -12   2537.74   2139.00    395.77 o
   7  12  13   3134.22   1445.64    715.49 <
   7  12 -13   2765.14   2330.44    421.61 o
   7  13   0   4621.59   5424.20    544.08 o
   7  13   1    814.48    940.03    344.76 <
   7  13  -1    952.53   1305.74    380.14 o
   7  13   2    941.00   1704.57    390.72 o
   7  13  -2    997.31   1545.04    408.17 o
   7  13   3   3603.54   3778.53    473.33 o
   7  13  -3   3184.53   3221.39    500.63 o
   7  13   4   1140.35   1040.66    375.60 <
   7  13  -4   1273.78   1079.93    416.16 <
   7  13   5    706.34    844.31    374.22 <
   7  13  -5    758.00    844.31    412.29 <
   7  13   6   1022.68    862.72    369.49 <
   7  13  -6   1305.99    982.98    319.36 o
   7  13   7   2479.44   2235.95    466.66 o
   7  13  -7   2411.96   2194.22    377.10 o
   7  13   8    372.20    715.46    395.02 <
   7  13  -8    435.93    355.89    325.23 <
   7  13   9   3688.97   4729.61    917.84 o
   7  13  -9   3580.70   3528.19    445.58 o
   7  13  10   1390.08   1781.89    750.81 <
   7  13 -10   1376.39   1832.20    382.35 o
   7  13  11    306.76    245.44    671.28 <
   7  13 -11    312.49    -51.54    467.58 <
   7  14   0   2342.30   2291.17    353.52 o
   7  14   1   1596.55   1601.49    417.24 o
   7  14  -1   1733.44   1875.15    428.13 o
   7  14   2    668.95    543.65    369.44 <
   7  14  -2    471.36    126.40    357.18 <
   7  14   3   2771.65   2665.47    455.46 o
   7  14  -3   2937.66   2796.78    484.96 o
   7  14   4   1085.47    860.26    400.21 <
   7  14  -4   1095.74    849.22    424.75 <
   7  14   5    297.00    257.71    382.89 <
   7  14  -5    324.90    979.30    429.21 <
   7  14   6   4398.71   4444.90    574.23 o
   7  14  -6   4501.55   4712.43    592.29 o
   7  14   7    415.64    931.44    417.00 <
   7  14  -7    449.24    613.60    325.13 <
   7  14  -8    391.77    711.77    457.63 <
   8   0   0  54071.70  64842.50   3903.07 o
   8   0   1    529.93    144.81    260.27 <
   8   0   2   8569.34   8439.42    618.98 o
   8   0   3    708.10   -246.67    279.87 <
   8   0   4   8881.55   9250.60    640.42 o
   8   0   5   1262.08   2103.41    328.87 o
   8   0   6  17908.90  17805.40    947.91 o
   8   0   7    772.38    636.91    282.34 <
   8   0   8   2149.21   2244.54    347.13 o
   8   0   9     76.14   -240.53    235.57 <
   8   0  10  10454.10  12179.90    717.87 o
   8   0  11     28.75    -44.18    249.12 <
   8   0  12  16795.40  17294.90   1311.36 o
   8   0  13    712.68    873.76    278.45 o
   8   0  14    191.97     17.18    247.91 <
   8   0  15    612.28    895.85    304.14 <
   8   0  16  12388.90  11993.40    773.56 o
   8   0  17      2.09     71.18    271.21 <
   8   0  18   7350.53   6969.24    598.85 o
   8   0  19      3.49    153.40    279.79 <
   8   0  20     14.44   -112.90    292.06 <
   8   0  21    217.30     57.68    402.53 <
   8   1   0    657.27   1673.89    316.70 o
   8   1   1  13717.80  13501.60    810.91 o
   8   1  -1  13688.40  15231.90    823.49 o
   8   1   2    449.26    208.62    272.51 <
   8   1  -2    575.88    337.48    262.72 <
   8   1   3  25864.00  26925.90   1288.87 o
   8   1  -3  25739.60  26727.10   1290.54 o
   8   1   4    846.23    791.54    288.43 <
   8   1  -4   1077.63   1168.29    312.85 o
   8   1   5    684.28   3158.80    484.02 o
   8   1  -5    884.37   1099.57    295.55 o
   8   1   6      7.70     22.09    236.85 <
   8   1  -6      9.19    -78.54    245.43 <
   8   1   7   4329.11   4260.82    428.47 o
   8   1  -7   4108.64   4668.25    445.20 o
   8   1   8   1050.96    813.63    284.91 <
   8   1  -8    944.47    841.86    283.57 <
   8   1   9  16506.50  16240.70    878.76 o
   8   1  -9  16326.50  16406.40    893.01 o
   8   1  10     68.92    854.13    268.29 o
   8   1 -10     55.77   2086.23    310.49 o
   8   1  11   1470.47   1805.20    431.62 o
   8   1 -11   1468.01   1303.28    303.31 o
   8   1  12    358.53    537.51    354.60 <
   8   1 -12    512.09    611.14    269.93 <
   8   1  13  13691.10  12991.10    787.32 o
   8   1 -13  14047.70  13942.20    646.11 o
   8   1  14    796.48   1222.29    306.40 o
   8   1 -14    734.16    915.49    231.76 o
   8   1  15  11039.30  11698.80    740.96 o
   8   1 -15  11504.00  11390.80    731.88 o
   8   1  16   1045.86   1406.37    323.60 o
   8   1 -16    928.23    717.91    306.94 <
   8   1  17     80.94   -157.08    265.06 <
   8   1 -17     58.68    208.62    267.51 <
   8   1  18    344.16    479.83    296.93 <
   8   1 -18    351.56    306.80    284.72 <
   8   1  19   6744.39   7656.47    623.01 o
   8   1 -19   6142.54   6165.43    577.94 o
   8   1  20    198.46    231.94    468.78 <
   8   1 -20    262.56    546.10    309.14 <
   8   2   0  32904.10  36478.40   1651.19 o
   8   2   1   2756.07   2783.28    375.47 o
   8   2  -1   2785.97   2618.83    357.45 o
   8   2   2   2137.24   1918.11    356.21 o
   8   2  -2   2255.94   2383.21    355.66 o
   8   2   3    348.29    333.80    249.13 <
   8   2  -3    470.32    504.38    277.33 <
   8   2   4  13586.00  13729.90    766.31 o
   8   2  -4  12618.00  12505.10    778.53 o
   8   2   5    663.76   1228.42    286.62 o
   8   2  -5    765.45   1790.48    320.29 o
   8   2   6  15980.20  15241.80    840.58 o
   8   2  -6  14866.70  15353.40    857.97 o
   8   2   7    200.66   -130.08    239.30 <
   8   2  -7    268.59    391.48    263.80 <
   8   2   8   1648.34   1638.31    416.03 o
   8   2  -8   1109.73    867.63    287.38 o
   8   2   9    701.21    595.19    261.46 <
   8   2  -9    657.85   1012.44    278.27 o
   8   2  10   7820.09   7390.17    573.38 o
   8   2 -10   9599.77  10817.70    648.90 o
   8   2  11    197.95    246.67    343.61 <
   8   2 -11    347.74    347.30    272.44 <
   8   2  12  11897.40  11882.90    735.15 o
   8   2 -12  13319.60  12460.90    767.13 o
   8   2  13    301.94   -123.95    258.95 <
   8   2 -13    298.72    193.90    212.34 <
   8   2  14     56.75     99.40    269.98 <
   8   2 -14     96.17    155.85    208.61 <
   8   2  15    704.22    573.10    299.51 <
   8   2 -15    639.62    575.55    227.08 <
   8   2  16   7933.92   7411.03    612.87 o
   8   2 -16   7197.48   6852.66    572.99 o
   8   2  17    852.17    677.41    326.54 <
   8   2 -17    812.28    814.86    301.89 <
   8   2  18   6068.49   4485.40    797.88 o
   8   2 -18   5653.34   5182.44    519.17 o
   8   2  19    113.59    134.99    440.56 <
   8   2 -19     82.65    -67.50    287.16 <
   8   2  20     23.11   -326.43    420.88 <
   8   2 -20     28.46    109.22    301.88 <
   8   3   0    312.19    184.08    255.29 <
   8   3   1  10841.90  11181.00    707.91 o
   8   3  -1  10432.60  10831.20    697.87 o
   8   3   2   1516.57   1515.59    316.62 o
   8   3  -2    980.69   1381.82    317.42 o
   8   3   3  17534.30  18754.00    964.54 o
   8   3  -3  17664.40  18147.80    989.23 o
   8   3   4   1703.86   2035.92    328.37 o
   8   3  -4   1570.52   1585.54    330.10 o
   8   3   5   2174.28   2170.91    327.67 o
   8   3  -5   2372.80   2272.77    358.51 o
   8   3   6    445.78    490.88    263.83 <
   8   3  -6    553.19    525.24    285.95 <
   8   3   7  11418.00  10728.10    675.49 o
   8   3  -7  11232.50  10731.80    702.80 o
   8   3   8   1177.68    795.22    274.01 <
   8   3  -8   1371.05   1573.26    318.82 o
   8   3   9  16506.40  17413.90   1194.28 o
   8   3  -9  16441.10  14827.00    893.47 o
   8   3  10    171.09    256.48    344.83 <
   8   3 -10    229.28    310.48    277.32 <
   8   3  11   1063.30    715.46    349.97 <
   8   3 -11   1011.85    684.78    302.12 <
   8   3  12    451.42    457.74    277.34 <
   8   3 -12    534.51    786.63    289.45 <
   8   3  13   9154.88   8810.03    650.45 o
   8   3 -13   9902.72   9563.53    530.57 o
   8   3  14   1071.56    890.94    313.08 <
   8   3 -14   1290.25   1413.73    263.68 o
   8   3  15   8359.55   9715.70    687.28 o
   8   3 -15   8110.91   8395.24    517.89 o
   8   3  16    422.26    -78.54    451.63 <
   8   3 -16    540.47    293.30    288.48 <
   8   3  17     83.24    634.46    517.75 <
   8   3 -17     76.85    235.62    289.59 <
   8   3  18    843.88    578.01    511.83 <
   8   3 -18    691.64    484.74    315.49 <
   8   3  19   5773.74   4500.12    805.89 o
   8   3 -19   5160.36   4948.05    518.42 o
   8   3  20   1228.71    542.42    532.87 <
   8   3 -20    937.90   1653.03    580.00 <
   8   4   0  21813.60  22249.00   1129.20 o
   8   4   1    680.66    257.71    261.57 <
   8   4  -1    732.62    944.94    310.32 o
   8   4   2   2051.79   2314.49    355.45 o
   8   4  -2   2100.62   2062.91    362.08 o
   8   4   3    342.17    748.59    270.96 <
   8   4  -3    492.78    309.25    279.86 <
   8   4   4   5989.18   5875.81    497.37 o
   8   4  -4   6150.57   6336.01    540.62 o
   8   4   5   5057.07   5542.01    478.38 o
   8   4  -5   4896.87   5600.92    511.00 o
   8   4   6  16921.10  17005.20    912.62 o
   8   4  -6  18179.30  17590.60    958.90 o
   8   4   7   3197.97   3310.97    366.66 o
   8   4  -7   2946.89   3001.72    401.18 o
   8   4   8   1733.02   1475.09    411.37 o
   8   4  -8   2068.24   1627.26    347.90 o
   8   4   9   2223.97   2447.03    474.63 o
   8   4  -9   2181.26   1943.88    366.05 o
   8   4  10   9586.15  10236.00    927.12 o
   8   4 -10   9925.88  11546.70    748.40 o
   8   4  11   1173.94    987.89    371.98 <
   8   4 -11   1477.32   1694.76    350.71 o
   8   4  12  10398.20  10490.10    685.63 o
   8   4 -12   9790.13  10480.20    725.13 o
   8   4  13    883.59    860.26    310.50 <
   8   4 -13   1121.69    722.82    239.68 o
   8   4  14    192.62    533.83    488.35 <
   8   4 -14    135.47     41.72    222.13 <
   8   4  15    111.53    157.08    446.70 <
   8   4 -15    106.22    504.38    242.82 <
   8   4  16   5713.44   4581.12    815.47 o
   8   4 -16   5996.75   6208.38    443.46 o
   8   4  17   2008.22   1741.39    633.44 <
   8   4 -17   1870.87   1347.46    341.78 o
   8   4  18   3713.16   3630.04    754.83 o
   8   4 -18   3792.34   3898.80    728.80 o
   8   4  19    230.38    337.48    512.95 <
   8   4 -19    122.11    289.62    512.95 <
   8   4  20     72.04   -595.19    514.07 <
   8   4 -20     44.76    352.20    498.20 <
   8   5   0    177.54    562.05    284.55 <
   8   5   1   4944.96   5072.00    474.57 o
   8   5  -1   5321.97   5258.53    495.97 o
   8   5   2   1345.46    639.37    295.08 <
   8   5  -2    828.83   1071.34    321.33 o
   8   5   3  14382.40  14827.00    860.70 o
   8   5  -3  15622.10  16626.00    902.08 o
   8   5   4   4957.50   5605.83    475.42 o
   8   5  -4   4548.33   5038.86    496.96 o
   8   5   5   1103.42   2546.43    331.41 o
   8   5  -5   1272.85   1060.30    325.40 o
   8   5   6    467.35    386.57    250.38 <
   8   5  -6    469.14     82.22    268.84 <
   8   5   7   6809.13   7887.18    538.42 o
   8   5  -7   6321.09   6477.13    580.00 o
   8   5   8   8481.33   8573.18    830.56 o
   8   5  -8   8567.54   7602.47    637.67 o
   8   5   9  20041.80  20026.60   1434.65 o
   8   5  -9  20634.60  20720.00   1107.73 o
   8   5  10   1475.81   1476.32    404.97 o
   8   5 -10   1198.54   1336.42    332.43 o
   8   5  11    323.47    255.26    268.77 <
   8   5 -11    308.22    445.47    304.30 <
   8   5  12    245.90    125.17    413.58 <
   8   5 -12    340.47    170.58    223.40 <
   8   5  13   7421.66   6614.58    574.46 o
   8   5 -13   6956.31   6607.22    612.17 o
   8   5  14   2432.66   2143.91    666.63 o
   8   5 -14   2902.48   2388.12    422.99 o
   8   5  15   8626.19   7291.99    994.35 o
   8   5 -15   7764.07   8239.39    678.36 o
   8   5  16   1099.30    559.60    558.56 <
   8   5 -16   1290.68   1144.97    380.55 o
   8   5  17    194.74    520.33    530.08 <
   8   5 -17    241.01    131.31    322.77 <
   8   5  18   1088.37    876.22    598.96 <
   8   5 -18    926.57    951.08    563.27 <
   8   5  19   3269.80   2670.38    705.06 o
   8   5 -19   3499.76   2714.56    704.07 o
   8   6   0   8763.57   9912.05    690.38 o
   8   6   1   2428.60   2677.74    381.21 o
   8   6  -1   2476.99   2624.97    397.36 o
   8   6   2   2558.20   2552.57    358.35 o
   8   6  -2   2648.28   2580.79    387.91 o
   8   6   3    165.05     39.27    263.86 <
   8   6  -3    271.94    161.99    274.91 <
   8   6   4   4470.69   4471.90    441.79 o
   8   6  -4   5018.96   4989.77    502.00 o
   8   6   5   9235.85   9480.08    651.93 o
   8   6  -5   9408.20  11084.00    716.28 o
   8   6   6  12872.90  13410.80    768.21 o
   8   6  -6  13754.40  13742.10    849.27 o
   8   6   7   7627.78   8740.08    598.42 o
   8   6  -7   7543.74   7847.91    654.36 o
   8   6   8   1528.03   1964.74    443.77 o
   8   6  -8   1922.97   1884.97    379.25 o
   8   6   9   1927.38   2125.50    461.19 o
   8   6  -9   1728.51   1345.01    351.41 o
   8   6  10   4460.26   4859.69    610.32 o
   8   6 -10   4096.37   3969.98    481.34 o
   8   6  11   2972.39   2767.32    402.90 o
   8   6 -11   2964.51   2515.75    435.16 o
   8   6  12   6769.99   6448.91    840.07 o
   8   6 -12   5941.01   5268.35    569.92 o
   8   6  13    988.66    836.95    564.57 <
   8   6 -13   1180.71   1387.96    388.83 o
   8   6  14    160.28    379.20    554.66 <
   8   6 -14    101.33     28.23    335.03 <
   8   6  15    104.81     11.04    517.88 <
   8   6 -15    185.39    385.34    350.93 <
   8   6  16   5818.68   5343.21    918.70 o
   8   6 -16   6613.37   7721.51    670.50 o
   8   6  17   3084.93   1835.88    685.87 <
   8   6 -17   3004.83   2812.73    467.88 o
   8   6  18   3371.67   1893.56    708.19 <
   8   6 -18   3716.24   3011.54    402.81 o
   8   6  19    292.99    315.39    562.05 <
   8   6 -19    239.16    672.50    534.94 <
   8   7   0    962.16   1805.20    364.77 o
   8   7   1   2234.15   2280.13    364.40 o
   8   7  -1   2068.27   1898.47    374.53 o
   8   7   2   3484.52   3891.44    431.03 o
   8   7  -2   3858.64   3833.76    450.44 o
   8   7   3  10596.70  12021.60    735.28 o
   8   7  -3  10885.90  11330.70    780.03 o
   8   7   4   3642.52   3958.93    417.70 o
   8   7  -4   4169.47   3941.75    457.05 o
   8   7   5   1165.33   1268.92    310.37 o
   8   7  -5   1121.91   2723.15    396.49 o
   8   7   6    302.10    166.90    363.27 <
   8   7  -6    249.59    241.76    305.57 <
   8   7   7   4164.29   4291.50    586.35 o
   8   7  -7   4214.38   3974.88    487.73 o
   8   7   8   8452.65   8421.01    824.76 o
   8   7  -8   7954.42   7841.78    665.49 o
   8   7   9   2426.52   3612.86    552.85 o
   8   7  -9   2874.64   2595.52    428.76 o
   8   7  10    505.15    573.10    511.72 <
   8   7 -10    424.81   -341.16    303.06 <
   8   7  11    388.82    382.89    481.06 <
   8   7 -11    382.94    358.34    337.49 <
   8   7  12    275.42    214.76    299.45 <
   8   7 -12    330.71    368.16    348.51 <
   8   7  13   4281.56   4093.92    780.76 o
   8   7 -13   3987.53   4120.92    529.88 o
   8   7  14   3957.86   3524.50    778.59 o
   8   7 -14   3554.20   3495.05    505.71 o
   8   7  15   4571.31   3841.12    836.67 o
   8   7 -15   4330.06   4428.95    447.67 o
   8   7  16   1866.12   1038.21    617.75 <
   8   7 -16   1857.00   1806.43    351.05 o
   8   7  17      5.98   -492.11    511.66 <
   8   7 -17      1.29     -9.82    287.16 <
   8   7  18   1064.21   1239.47    669.97 <
   8   7 -18   1341.67    975.62    343.93 <
   8   8   0   6367.53   6896.84    578.83 o
   8   8   1   6134.47   6363.01    561.37 o
   8   8  -1   6166.76   6943.47    575.61 o
   8   8   2   4335.60   4301.32    452.92 o
   8   8  -2   4425.51   4479.26    482.15 o
   8   8   3    225.76     18.41    268.77 <
   8   8  -3    251.40   -170.58    288.38 <
   8   8   4   2723.25   2999.26    390.93 o
   8   8  -4   2759.05   2865.50    423.19 o
   8   8   5   7082.29   7445.39    828.73 o
   8   8  -5   7293.26   7906.82    653.40 o
   8   8   6   6266.44   7906.82    804.73 o
   8   8  -6   6247.14   6455.05    608.11 o
   8   8   7   2731.05   3568.68    545.98 o
   8   8  -7   2907.67   2492.43    435.10 o
   8   8   8    193.24    651.64    391.32 <
   8   8  -8     68.61    -31.91    328.89 <
   8   8   9   2138.37   2363.58    384.98 o
   8   8  -9   1908.45   1599.04    400.42 o
   8   8  10   3051.42   3863.21    476.98 o
   8   8 -10   3560.73   4508.71    533.07 o
   8   8  11   2478.53   2072.73    382.28 o
   8   8 -11   2151.99   1395.32    418.04 o
   8   8  12   4034.38   3368.65    726.15 o
   8   8 -12   4561.82   4335.68    547.82 o
   8   8  13   2006.71   2205.27    668.65 o
   8   8 -13   1840.78   1196.52    332.07 o
   8   8  14     93.21    107.99    535.06 <
   8   8 -14    106.46    600.10    311.52 <
   8   8  15    505.25    738.77    622.12 <
   8   8 -15    606.57    747.36    330.04 <
   8   8  16   2526.97   3449.65    781.96 o
   8   8 -16   2437.37   2555.02    396.18 o
   8   8  17   4233.23   3750.31    843.68 o
   8   8 -17   4538.97   4484.17    491.01 o
   8   9   0     18.56    -20.86    288.39 <
   8   9   1   1177.25   1397.78    349.53 o
   8   9  -1    717.49   1073.80    342.12 o
   8   9   2   6282.58   6100.39    535.62 o
   8   9  -2   6472.37   6064.80    562.03 o
   8   9   3   6902.09   7298.13    569.32 o
   8   9  -3   6581.50   6907.88    606.49 o
   8   9   4   5604.29   6755.71    771.83 o
   8   9  -4   5206.80   5735.91    565.58 o
   8   9   5    874.32    684.78    427.15 <
   8   9  -5    892.39    574.33    340.10 <
   8   9   6    227.78    -77.31    369.39 <
   8   9  -6    181.82   -128.85    311.70 <
   8   9   7   3334.53   3227.52    587.98 o
   8   9  -7   3604.15   4608.12    525.52 o
   8   9   8   4409.02   3190.71    445.65 o
   8   9  -8   4556.98   4588.48    531.30 o
   8   9   9   4436.22   4400.72    505.69 o
   8   9  -9   4278.80   3785.90    533.58 o
   8   9  10   2233.52   2541.52    415.54 o
   8   9 -10   2203.48   2348.85    475.96 o
   8   9  11     50.58    -22.09    489.65 <
   8   9 -11     98.16    609.92    391.32 <
   8   9  12    757.53   1125.34    622.03 <
   8   9 -12    696.09    868.85    323.86 <
   8   9  13   1201.12   1082.39    643.10 <
   8   9 -13   1423.02   1590.44    359.38 o
   8   9  14   4928.23   4365.13    894.16 o
   8   9 -14   4817.61   4741.88    488.62 o
   8   9  15   2077.62   1354.82    658.24 <
   8   9 -15   2294.65   1821.16    384.76 o
   8   9  16   1118.55    310.48    618.71 <
   8   9 -16   1205.18   1569.58    434.10 o
   8  10   0   1344.95   1302.05    357.16 o
   8  10   1   7888.64   8250.43    645.52 o
   8  10  -1   7931.42   8459.05    669.54 o
   8  10   2   1515.44   1179.33    337.82 o
   8  10  -2   1567.59   1146.20    367.33 o
   8  10   3    162.88    117.81    278.58 <
   8  10  -3    250.86   -164.44    319.06 <
   8  10   4   1098.46   1821.16    501.32 o
   8  10  -4    845.03    715.46    367.00 <
   8  10   5   7024.62   7256.40    814.31 o
   8  10  -5   6568.11   6727.48    637.70 o
   8  10   6   5628.91   7071.10    787.10 o
   8  10  -6   5329.72   5599.69    596.98 o
   8  10   7   3139.67   2902.32    431.18 o
   8  10  -7   2974.53   2195.45    452.74 o
   8  10   8    192.94    254.03    339.92 <
   8  10  -8    107.58    139.90    362.02 <
   8  10   9    392.55    179.17    326.48 <
   8  10  -9    403.14    884.81    414.57 <
   8  10  10   1044.85   1002.62    386.60 <
   8  10 -10   1397.17   1100.79    446.91 <
   8  10  11   5114.31   4143.01    893.47 o
   8  10 -11   5066.80   5056.04    484.77 o
   8  10  12    642.72    952.30    641.71 <
   8  10 -12   1207.21   1349.91    350.84 o
   8  10  13   1598.16    844.31    671.60 <
   8  10 -13   1672.40   1747.53    376.66 o
   8  10  14    655.39    160.76    575.63 <
   8  10 -14    586.91     95.72    322.86 <
   8  11   0      0.18    517.88    329.97 <
   8  11   1    291.28    233.17    319.08 <
   8  11  -1    262.55    520.33    338.62 <
   8  11   2   6606.29   6601.08    569.43 o
   8  11  -2   6118.29   6452.59    600.39 o
   8  11   3   1620.88   1282.42    337.85 o
   8  11  -3   1588.73   1776.98    408.45 o
   8  11   4   4563.74   5233.99    716.66 o
   8  11  -4   3900.05   4015.38    529.92 o
   8  11   5    478.04    578.01    456.48 <
   8  11  -5    447.58    558.37    375.48 <
   8  11   6    386.27    500.70    346.03 <
   8  11  -6    406.59    420.93    384.11 <
   8  11   7   2627.51   2374.62    443.39 o
   8  11  -7   2728.80   2988.22    513.80 o
   8  11   8   4726.94   4966.46    560.27 o
   8  11  -8   4792.52   5588.65    620.37 o
   8  11   9   1151.78    937.58    394.08 <
   8  11  -9   1179.76   1927.92    459.47 o
   8  11  10   2582.46   2643.38    809.90 o
   8  11 -10   2579.82   2049.42    495.20 o
   8  11  11     58.48    159.54    641.82 <
   8  11 -11    120.87   -142.35    310.47 <
   8  11  12    742.86    913.03    693.31 <
   8  11 -12    770.00    358.34    322.92 <
   8  11  13    218.04    -58.91    612.37 <
   8  11 -13     92.88   -406.20    482.22 <
   8  12   0    259.01    343.61    338.68 <
   8  12   1   5114.77   5679.46    538.43 o
   8  12  -1   4971.72   5448.75    567.01 o
   8  12   2    174.63    641.82    458.84 <
   8  12  -2    197.36   -104.31    332.57 <
   8  12   3    352.85    733.86    471.11 <
   8  12  -3    334.45    555.92    366.85 <
   8  12   4    297.22   1003.85    365.31 <
   8  12  -4    329.88    260.17    364.49 <
   8  12   5   4312.73   4894.05    560.76 o
   8  12  -5   4061.04   3925.80    542.68 o
   8  12   6   1105.74    920.40    386.69 <
   8  12  -6   1127.46   1148.65    434.41 <
   8  12   7   2782.79   2811.50    465.06 o
   8  12  -7   2715.92   2737.87    509.26 o
   8  12   8    172.74    241.76    373.06 <
   8  12  -8    243.98    227.03    408.66 <
   8  12   9    155.91    438.11    397.55 <
   8  12  -9    189.11    254.03    424.60 <
   8  12  10    676.14    932.67    719.06 <
   8  12 -10    655.04   1704.57    490.11 o
   8  12 -11   5113.49   4291.50    763.40 o
   8  13   0    154.01   -126.40    330.11 <
   8  13   1     54.15    235.62    338.68 <
   8  13  -1    102.81   -370.61    337.40 <
   8  13   2   5717.57   6048.84    835.09 o
   8  13  -2   5955.32   5911.40    602.67 o
   8  13   3    933.51    792.77    392.78 <
   8  13  -3    981.19    681.09    400.22 <
   8  13   4   1900.98   1678.80    439.57 o
   8  13  -4   1956.80   1811.34    455.45 o
   8  13   5    196.19   -234.39    344.81 <
   8  13  -5    207.32    779.27    423.17 <
   8  13   6    231.01     72.40    373.08 <
   8  13  -6    240.44    149.72    391.49 <
   8  13   7    609.55    117.81    382.98 <
   8  13  -7    600.23    618.51    429.51 <
   9   0   1   6426.71   7359.49    598.40 o
   9   0   2   9154.22  10226.20    730.01 o
   9   0   3    121.99   -494.56    267.35 <
   9   0   4   7712.88   8290.93    633.72 o
   9   0   5   7626.77   8868.94    637.44 o
   9   0   6    187.81    488.42    288.28 <
   9   0   7   3902.88   3780.99    434.71 o
   9   0   8   4033.30   3944.20    438.32 o
   9   0   9     23.29    376.75    267.44 <
   9   0  10   4493.24   4824.10    462.98 o
   9   0  11   5965.29   5841.45    512.12 o
   9   0  12   3162.04   2745.24    382.50 o
   9   0  13   2085.00   1680.03    275.60 o
   9   0  14  13470.20  13127.30    804.09 o
   9   0  15   1390.21   1117.97    326.70 o
   9   0  16    791.89    776.81    330.12 <
   9   0  17   4804.46   3826.39    469.87 o
   9   0  18    526.13     54.00    286.03 <
   9   0  19    298.73    465.11    320.24 <
   9   1   0    297.79   1426.00    316.85 o
   9   1   1  12684.50  11772.50    791.58 o
   9   1  -1  12685.30  13300.30    799.91 o
   9   1   2   7622.79   7817.23    620.31 o
   9   1  -2   6869.80   6998.69    603.38 o
   9   1   3    327.99    406.20    287.14 <
   9   1  -3    283.19   -202.49    287.14 <
   9   1   4   5256.25   5943.31    526.94 o
   9   1  -4   5226.98   5452.43    528.31 o
   9   1   5   6498.52   6399.82    553.77 o
   9   1  -5   6971.16   7338.63    591.54 o
   9   1   6    414.18    623.41    288.28 <
   9   1  -6    428.16    725.27    302.95 <
   9   1   7   6474.71   5966.62    519.48 o
   9   1  -7   5760.32   5424.20    517.61 o
   9   1   8   5595.32   6081.98    538.54 o
   9   1  -8   6580.49   7716.60    590.21 o
   9   1   9    162.26    380.43    288.33 <
   9   1  -9    308.59    357.11    288.38 <
   9   1  10   3012.45   3374.79    394.36 o
   9   1 -10   2827.32   2975.95    393.64 o
   9   1  11  13760.50  13547.00    801.10 o
   9   1 -11  14301.60  13105.20    818.91 o
   9   1  12   1962.46   1298.37    463.23 <
   9   1 -12   2014.07   1444.41    340.66 o
   9   1  13   2821.18   2677.74    392.97 o
   9   1 -13   2883.24   3028.72    324.85 o
   9   1  14   4976.33   4381.09    464.22 o
   9   1 -14   5145.77   4506.26    380.10 o
   9   1  15   3990.93   3913.52    470.19 o
   9   1 -15   4118.92   5014.32    492.28 o
   9   1  16   1269.02    758.41    328.05 <
   9   1 -16   1493.75   1399.00    338.81 o
   9   1  17   5270.97   4091.47    477.89 o
   9   1 -17   4872.45   4241.19    485.06 o
   9   1  18   1622.85   1103.25    345.35 o
   9   1 -18   1542.20   1527.86    371.86 o
   9   1  19   2050.53   1489.81    379.86 o
   9   1 -19   2171.76   2051.87    406.37 o
   9   2   0   1349.35   1749.98    349.26 o
   9   2   1   4015.29   4160.19    473.36 o
   9   2  -1   4041.91   4670.70    481.96 o
   9   2   2  11073.00  11009.20    734.12 o
   9   2  -2  11676.40  10992.00    739.09 o
   9   2   3   1815.60   1958.60    352.00 o
   9   2  -3   1765.62   1876.38    383.97 o
   9   2   4   5120.73   5448.75    512.06 o
   9   2  -4   6005.30   7030.60    573.60 o
   9   2   5   5534.71   5359.16    501.20 o
   9   2  -5   5592.35   5534.65    526.63 o
   9   2   6     79.37    213.53    276.10 <
   9   2  -6    203.56    -25.77    282.27 <
   9   2   7   3642.78   3128.12    404.87 o
   9   2  -7   3261.10   3436.15    430.38 o
   9   2   8   7275.68   6408.41    539.16 o
   9   2  -8   7508.60   6944.70    576.19 o
   9   2   9    130.93    738.77    288.09 <
   9   2  -9    386.19    652.87    302.98 <
   9   2  10   5244.81   5739.59    491.84 o
   9   2 -10   5102.99   5518.70    520.41 o
   9   2  11   6281.55   5465.93    714.75 o
   9   2 -11   6596.36   6747.12    572.63 o
   9   2  12   1815.51   1384.28    443.41 o
   9   2 -12   1856.69   1765.93    347.42 o
   9   2  13   2402.58   2275.22    388.00 o
   9   2 -13   2422.95   2384.44    300.74 o
   9   2  14   8147.50   8494.64    625.86 o
   9   2 -14   7791.38   7010.96    478.10 o
   9   2  15   2052.79   1978.24    386.67 o
   9   2 -15   1706.93   1948.79    370.29 o
   9   2  16   1474.24   1262.78    354.87 o
   9   2 -16   1180.09    863.95    323.01 <
   9   2  17   3612.89   3351.47    454.59 o
   9   2 -17   3102.78   2829.91    434.92 o
   9   2  18   1593.87   1507.00    369.48 o
   9   2 -18   1617.24    958.44    339.32 <
   9   2  19    385.64    354.66    488.43 <
   9   2 -19    361.19    220.90    398.86 <
   9   3   0    773.06    640.60    314.24 <
   9   3   1   6212.34   6651.40    570.54 o
   9   3  -1   6035.91   6678.40    563.78 o
   9   3   2   3542.54   3568.68    439.28 o
   9   3  -2   3683.70   3502.41    443.41 o
   9   3   3   2078.22   1891.11    352.48 o
   9   3  -3   1761.61   1754.89    360.80 o
   9   3   4   4896.97   4906.33    485.94 o
   9   3  -4   5484.37   5623.01    535.90 o
   9   3   5   7074.01   7326.35    584.54 o
   9   3  -5   6995.16   7498.16    613.22 o
   9   3   6   1935.68   1812.57    338.89 o
   9   3  -6   1786.84   1854.29    376.66 o
   9   3   7   7708.98   8020.95    600.23 o
   9   3  -7   8122.52   7434.35    615.89 o
   9   3   8   6218.14   6216.97    530.15 o
   9   3  -8   7038.39   6847.75    578.62 o
   9   3   9    996.76   1438.27    317.36 o
   9   3  -9    777.64   1048.02    323.77 o
   9   3  10   1719.12   1800.30    333.68 o
   9   3 -10   1620.21   2674.06    387.34 o
   9   3  11   8297.56   8579.32    843.55 o
   9   3 -11   7776.84   7937.50    640.07 o
   9   3  12    652.90    332.57    373.17 <
   9   3 -12    808.37    560.83    310.62 <
   9   3  13   3844.83   3605.50    443.55 o
   9   3 -13   4064.23   4158.96    371.56 o
   9   3  14   3649.92   3766.26    442.76 o
   9   3 -14   3331.63   3191.93    343.97 o
   9   3  15   1106.21    614.83    313.26 <
   9   3 -15   1041.99   1198.97    279.63 o
   9   3  16    852.80    272.44    331.56 <
   9   3 -16   1141.41    935.12    267.73 o
   9   3  17   2868.06   2259.27    431.67 o
   9   3 -17   2819.18   2919.50    430.57 o
   9   3  18   2219.39   1356.05    616.67 <
   9   3 -18   2088.70   1867.79    381.96 o
   9   4   0    370.82    368.16    299.44 <
   9   4   1   5472.21   5083.04    516.47 o
   9   4  -1   5596.69   6074.62    547.18 o
   9   4   2   8267.75   8428.38    638.81 o
   9   4  -2   8134.69   8295.84    656.01 o
   9   4   3   1631.22   1217.38    325.67 o
   9   4  -3   1142.61    917.94    333.98 <
   9   4   4   3923.55   4700.16    454.50 o
   9   4  -4   3468.67   3604.27    455.01 o
   9   4   5   5338.31   5908.94    507.57 o
   9   4  -5   4667.06   5529.74    543.89 o
   9   4   6    698.36    570.65    295.83 <
   9   4  -6    754.52    924.08    326.31 <
   9   4   7   8509.76   8225.89    602.37 o
   9   4  -7   9115.66   7841.78    641.31 o
   9   4   8  12461.30  12823.00    753.10 o
   9   4  -8  11990.20  11268.10    794.34 o
   9   4   9   1403.85   1481.22    314.07 o
   9   4  -9   1594.25   2204.04    380.80 o
   9   4  10   5911.52   6943.47    758.47 o
   9   4 -10   6146.70   6766.75    598.29 o
   9   4  11   6974.54   6631.76    745.73 o
   9   4 -11   6949.47   6581.45    584.04 o
   9   4  12    582.85    374.29    297.06 <
   9   4 -12    693.58    542.42    319.15 <
   9   4  13   1947.23   1904.61    371.90 o
   9   4 -13   1321.63    984.21    264.22 o
   9   4  14   4127.52   3039.76    424.49 o
   9   4 -14   4090.43   3722.08    370.41 o
   9   4  15   2136.02   1877.61    405.31 o
   9   4 -15   2128.54   2126.73    317.85 o
   9   4  16    542.79    251.57    324.06 <
   9   4 -16    393.07    195.12    247.95 <
   9   4  17   2449.81   2829.91    738.40 o
   9   4 -17   2387.11   2416.35    425.79 o
   9   4  18   2310.87   1449.32    641.22 <
   9   4 -18   2283.41   2416.35    424.41 o
   9   5   0    736.12    474.92    311.83 <
   9   5   1   4338.48   4782.38    505.75 o
   9   5  -1   4820.21   5578.83    537.97 o
   9   5   2   2811.61   3115.85    424.03 o
   9   5  -2   2927.76   3005.40    434.29 o
   9   5   3   3484.97   3734.35    424.04 o
   9   5  -3   3355.09   2833.59    431.71 o
   9   5   4   4023.37   4492.76    460.25 o
   9   5  -4   3965.25   4138.10    484.35 o
   9   5   5   6524.70   6949.60    555.76 o
   9   5  -5   6962.69   6646.49    593.70 o
   9   5   6   4986.51   4706.29    457.30 o
   9   5  -6   4665.73   3863.21    491.45 o
   9   5   7   5829.95   5478.20    490.72 o
   9   5  -7   5444.61   5683.14    555.28 o
   9   5   8   5764.97   5399.66    729.69 o
   9   5  -8   6661.20   7354.58    622.53 o
   9   5   9   1800.47   1713.16    455.38 o
   9   5  -9   2000.73   1768.39    378.28 o
   9   5  10   3860.59   4281.68    610.38 o
   9   5 -10   3934.78   3703.67    487.67 o
   9   5  11   6748.51   6711.53    738.86 o
   9   5 -11   6371.53   5858.63    578.21 o
   9   5  12   1323.09   1008.75    359.83 <
   9   5 -12   1857.21   1860.43    396.38 o
   9   5  13   3080.29   3124.44    438.02 o
   9   5 -13   3049.47   2999.26    343.73 o
   9   5  14   4230.34   4332.00    496.78 o
   9   5 -14   3196.04   2548.88    351.11 o
   9   5  15   1002.45   1282.42    374.06 o
   9   5 -15    979.41    942.49    379.23 <
   9   5  16   1068.56    269.98    575.75 <
   9   5 -16   1018.56    873.76    365.80 <
   9   5  17   2883.29   2626.20    708.35 o
   9   5 -17   3259.24   2330.44    444.49 o
   9   6   0   1035.01   1389.18    351.86 o
   9   6   1   2954.30   2643.38    401.86 o
   9   6  -1   2519.33   2849.55    425.27 o
   9   6   2   5351.06   6477.13    555.08 o
   9   6  -2   5349.53   5961.71    569.00 o
   9   6   3   3287.79   3229.98    425.95 o
   9   6  -3   3304.51   3384.60    461.27 o
   9   6   4   5930.95   5608.28    510.25 o
   9   6  -4   5807.18   6171.56    567.16 o
   9   6   5   4227.97   4373.72    457.38 o
   9   6  -5   4101.97   4541.85    511.96 o
   9   6   6   1966.25   1995.42    354.62 o
   9   6  -6   1846.52   1627.26    385.60 o
   9   6   7   5598.93   5289.21    500.36 o
   9   6  -7   6407.66   6266.06    584.55 o
   9   6   8   3015.74   2661.79    563.75 o
   9   6  -8   3596.69   3547.82    472.57 o
   9   6   9   4630.38   5130.90    680.12 o
   9   6  -9   4351.31   4610.57    532.02 o
   9   6  10   2521.26   2462.98    495.86 o
   9   6 -10   2498.89   2569.75    434.32 o
   9   6  11   2674.08   2837.27    419.41 o
   9   6 -11   2969.59   3326.93    476.74 o
   9   6  12   1639.01   1738.94    368.04 o
   9   6 -12   1732.04   1342.55    391.87 o
   9   6  13    927.67    149.72    308.30 <
   9   6 -13    323.64     11.04    341.19 <
   9   6  14   4188.36   2748.92    711.06 o
   9   6 -14   3893.48   4182.28    529.55 o
   9   6  15   1660.15    717.91    634.87 <
   9   6 -15   1716.34   1354.82    409.00 o
   9   6  16   1339.38    807.49    631.00 <
   9   6 -16   1576.65   1853.06    439.04 o
   9   6  17   1672.07   1413.73    644.44 <
   9   7   0   2465.31   3221.39    439.20 o
   9   7   1   5100.79   5562.87    530.12 o
   9   7  -1   5137.61   5883.17    553.90 o
   9   7   2   2763.73   2842.18    414.65 o
   9   7  -2   2602.57   2731.74    431.76 o
   9   7   3   2525.52   2618.83    402.36 o
   9   7  -3   2756.37   2465.43    431.21 o
   9   7   4   4487.70   4373.72    466.62 o
   9   7  -4   4122.77   4435.08    508.58 o
   9   7   5   6453.08   6561.81    543.30 o
   9   7  -5   6203.52   6351.96    600.91 o
   9   7   6   5379.94   5561.65    500.16 o
   9   7  -6   5012.44   4970.14    559.70 o
   9   7   7   2787.67   2277.67    518.52 o
   9   7  -7   2101.05   1548.72    395.80 o
   9   7   8   1379.03   1081.16    456.72 <
   9   7  -8   1895.20   2407.76    430.04 o
   9   7   9   1891.48   2069.05    501.73 o
   9   7  -9   1726.56   1927.92    421.92 o
   9   7  10   2150.30   1983.15    386.80 o
   9   7 -10   2644.31   2751.37    457.57 o
   9   7  11   2674.14   1898.47    643.74 <
   9   7 -11   2632.41   2556.25    466.45 o
   9   7  12   1362.84    600.10    543.97 <
   9   7 -12   1729.40   1374.46    407.77 o
   9   7  13   2325.35   1576.95    399.75 o
   9   7 -13   2502.64   1752.43    439.02 o
   9   7  14   2638.46   2038.37    752.75 <
   9   7 -14   2389.75   1315.55    425.74 o
   9   7  15   1494.66    994.03    633.48 <
   9   7 -15   1523.18   1622.35    431.88 o
   9   7  16   1645.16   1984.37    745.91 <
   9   7 -16   1573.20   1078.70    417.64 <
   9   8   0   2389.56   2755.05    419.09 o
   9   8   1   2734.28   3449.65    447.79 o
   9   8  -1   2720.48   3032.40    452.30 o
   9   8   2   2899.21   2146.36    397.60 o
   9   8  -2   2509.80   3314.65    453.85 o
   9   8   3   4187.42   4655.98    484.81 o
   9   8  -3   4351.64   4134.42    510.99 o
   9   8   4   4309.59   4574.98    475.48 o
   9   8  -4   4515.78   5305.16    556.47 o
   9   8   5   4034.08   3962.61    454.23 o
   9   8  -5   3321.31   3761.35    502.31 o
   9   8   6   1571.68   1133.93    492.41 <
   9   8  -6   1322.00   1461.59    390.11 o
   9   8   7   3188.82   3226.30    587.77 o
   9   8  -7   3315.95   3082.71    485.15 o
   9   8   8   1822.40   2208.95    527.29 o
   9   8  -8   1662.95   1622.35    414.83 o
   9   8   9   1162.98   1407.59    466.15 o
   9   8  -9   1202.80    878.67    392.92 <
   9   8  10   1296.47   1491.04    385.15 o
   9   8 -10   1222.51    856.58    395.40 <
   9   8  11   2375.04   1817.48    398.36 o
   9   8 -11   2638.42   3048.35    492.69 o
   9   8  12   2027.70   2233.49    412.05 o
   9   8 -12   1938.66   1482.45    442.24 o
   9   8  13   1673.40    560.83    571.13 <
   9   8 -13   1754.15   2087.46    463.50 o
   9   8  14   1668.91   1689.85    697.03 <
   9   8 -14   1892.29   1765.93    467.69 o
   9   8  15   2542.56   3286.43    810.43 o
   9   8 -15   2637.13   2840.96    691.92 o
   9   9   0   5279.24   4887.92    527.46 o
   9   9   1   2839.78   3682.81    457.30 o
   9   9  -1   2320.96   2238.40    421.05 o
   9   9   2   3280.85   2844.64    422.98 o
   9   9  -2   2862.25   2736.64    450.59 o
   9   9   3   2733.61   2858.14    423.16 o
   9   9  -3   3092.76   3623.91    480.05 o
   9   9   4   2135.46   2116.91    382.91 o
   9   9  -4   1801.29   1904.61    424.49 o
   9   9   5   3760.08   3936.84    650.13 o
   9   9  -5   3294.05   3806.76    520.60 o
   9   9   6   3124.97   3509.78    604.43 o
   9   9  -6   2837.80   2542.75    466.78 o
   9   9   7   2326.33   2040.83    535.36 o
   9   9  -7   2386.18   2498.57    469.86 o
   9   9   8   1670.16   1363.41    500.93 <
   9   9  -8   2038.33   2102.19    462.58 o
   9   9   9   2409.79   3128.12    465.15 o
   9   9  -9   2006.65   2621.29    499.90 o
   9   9  10   3162.49   3134.26    470.07 o
   9   9 -10   3138.97   2313.26    482.24 o
   9   9  11   1220.15    709.32    378.29 <
   9   9 -11   1428.29    708.09    423.81 <
   9   9  12   2407.44   2180.73    719.33 o
   9   9 -12   2412.43   2736.64    494.10 o
   9   9  13   1037.34   1622.35    713.92 <
   9   9 -13   1078.14   1033.30    434.46 <
   9  10   0   4007.56   3466.83    480.93 o
   9  10   1   1686.21   1715.62    390.21 o
   9  10  -1   1481.37   1668.99    402.32 o
   9  10   2    959.36   1180.56    356.93 o
   9  10  -2   1267.26   1532.77    401.04 o
   9  10   3   4925.43   4219.10    488.92 o
   9  10  -3   4729.51   4557.80    542.81 o
   9  10   4   3119.59   3388.29    431.42 o
   9  10  -4   3352.11   2660.56    472.37 o
   9  10   5   2141.48   2551.34    576.32 o
   9  10  -5   1896.90   1254.19    431.33 <
   9  10   6   2428.91   2901.09    581.10 o
   9  10  -6   2179.25   2210.18    471.20 o
   9  10   7   1945.37   2359.90    591.09 o
   9  10  -7   1580.59    595.19    411.70 <
   9  10   8   3201.82   2986.99    471.61 o
   9  10  -8   2998.17   3529.41    540.32 o
   9  10   9   2269.40   2318.17    456.45 o
   9  10  -9   2619.52   3560.09    551.99 o
   9  10  10   1177.35   1327.82    385.21 o
   9  10 -10    903.52   1066.43    456.42 <
   9  10  11    444.10    519.10    431.95 <
   9  10 -11    583.81    202.49    400.15 <
   9  10  12   1496.74    897.08    686.26 <
   9  10 -12   1763.19   1346.23    659.25 <
   9  11   0   3428.33   3135.48    473.00 o
   9  11   1    828.68    820.99    363.25 <
   9  11  -1    544.72    688.46    366.86 <
   9  11   2    859.27     88.36    324.20 <
   9  11  -2    939.32    925.30    377.98 <
   9  11   3   2230.75   1705.80    569.88 <
   9  11  -3   2536.32   2146.36    449.68 o
   9  11   4   1689.63   1432.14    534.03 <
   9  11  -4   1992.82   1703.35    438.43 o
   9  11   5   1863.78   2150.05    571.60 o
   9  11  -5   1722.33   1329.05    432.33 o
   9  11   6   3136.61   3309.75    667.37 o
   9  11  -6   3261.27   3699.99    537.97 o
   9  11   7   1991.70   1430.91    433.76 o
   9  11  -7   2081.76   1875.15    486.19 o
   9  11   8    894.12   1092.20    410.98 <
   9  11  -8    853.95    824.67    451.62 <
   9  11   9   2289.32   2380.76    477.26 o
   9  11  -9   1888.31   1748.75    494.70 o
   9  12   0   2071.56   2296.08    437.80 o
   9  12   1   1633.65   1887.43    396.08 o
   9  12  -1   1700.45   1321.69    402.88 o
   9  12   2    432.41    380.43    349.77 <
   9  12  -2    456.52    619.73    377.91 <
   9  12   3   3223.93   4468.22    743.10 o
   9  12  -3   3623.18   3978.57    546.66 o
   9  12   4   1896.69   2466.66    630.23 o
   9  12  -4   2078.07   1713.16    469.17 o
   9  12   5    500.08    733.86    392.60 <
   9  12  -5    604.81    917.94    419.54 <
   9  12   6   1492.43    981.76    417.62 <
   9  12  -6   1332.40   1725.44    473.34 o
  10   0   0   3352.76   3623.91    659.84 o
  10   0   1   5264.31   6829.34    594.46 o
  10   0   2    135.12   -256.48    285.89 <
  10   0   3  19676.90  19624.10   1082.64 o
  10   0   4      2.63    564.51    325.03 <
  10   0   5   2521.04   1849.38    391.20 o
  10   0   6    375.58    554.69    321.45 <
  10   0   7   2935.17   3004.17    431.85 o
  10   0   8     55.41   -223.35    293.27 <
  10   0   9   8812.99   9404.00    696.19 o
  10   0  10     17.19    176.72    298.19 <
  10   0  11    251.51   1237.01    324.47 o
  10   0  12    559.31    633.23    300.62 <
  10   0  13  12295.20  11633.80    784.39 o
  10   0  14    114.71     41.72    229.49 <
  10   0  15   8580.93   8103.17    667.95 o
  10   0  16     61.00    185.31    308.01 <
  10   0  17     24.60   -255.26    311.67 <
  10   1   0  14808.20  15202.50    929.74 o
  10   1   1   1473.68   1951.24    379.83 o
  10   1  -1   1481.15   1857.97    392.26 o
  10   1   2   4427.89   4238.73    487.64 o
  10   1  -2   4150.55   3836.21    486.65 o
  10   1   3    352.51    549.78    327.58 <
  10   1  -3    520.02    832.04    342.21 <
  10   1   4   5194.61   5356.71    537.09 o
  10   1  -4   5292.64   6110.20    575.80 o
  10   1   5     77.73   -294.53    283.42 <
  10   1  -5     24.28     46.63    303.12 <
  10   1   6  11041.40  11635.00    775.71 o
  10   1  -6  11090.60  11508.60    787.48 o
  10   1   7      3.87   -331.34    295.69 <
  10   1  -7     23.27    242.99    298.17 <
  10   1   8   1328.71   1117.97    336.45 o
  10   1  -8   1195.28   1321.69    356.99 o
  10   1   9    377.42    319.07    300.68 <
  10   1  -9    327.71     74.86    305.61 <
  10   1  10   6611.97   7052.69    592.59 o
  10   1 -10   7142.92   7273.58    607.05 o
  10   1  11      1.11    481.06    287.02 <
  10   1 -11     18.16    357.11    301.82 <
  10   1  12  10556.70   9721.84    986.47 o
  10   1 -12  10000.40   9245.69    699.78 o
  10   1  13    616.72    109.22    398.93 <
  10   1 -13    597.52    847.99    320.14 <
  10   1  14     68.73     83.45    288.39 <
  10   1 -14     60.12   -268.76    220.83 <
  10   1  15    531.56    500.70    325.22 <
  10   1 -15    364.02    299.44    299.45 <
  10   1  16   7667.04   8287.25    674.21 o
  10   1 -16   7989.30   6869.84    634.20 o
  10   1  17    393.33    294.53    450.40 <
  10   1 -17    340.85    204.94    429.54 <
  10   2   0   1333.12   1422.32    374.21 o
  10   2   1   4176.65   4896.51    522.30 o
  10   2  -1   4609.52   4799.56    528.47 o
  10   2   2    823.00    774.36    330.15 <
  10   2  -2    792.02    981.76    360.67 <
  10   2   3  16568.00  16122.90    943.31 o
  10   2  -3  15787.30  15240.50    950.99 o
  10   2   4    551.02    214.76    308.12 <
  10   2  -4    592.62    492.11    320.34 <
  10   2   5   1886.97   1664.08    364.76 o
  10   2  -5   2088.51    992.80    364.34 <
  10   2   6    146.12    414.79    315.32 <
  10   2  -6    190.00    753.50    348.28 <
  10   2   7   5135.00   4790.97    500.37 o
  10   2  -7   4744.90   5278.17    544.77 o
  10   2   8    499.42    339.93    301.95 <
  10   2  -8    825.93    181.62    308.25 <
  10   2   9  11690.60  13446.40    807.43 o
  10   2  -9  11980.60  11421.50    819.43 o
  10   2  10     24.49    119.04    283.47 <
  10   2 -10      0.99     42.95    301.89 <
  10   2  11    437.01    141.13    284.78 <
  10   2 -11    417.06    697.05    317.70 <
  10   2  12    773.73    679.87    308.08 <
  10   2 -12    795.04    659.00    328.97 <
  10   2  13   6754.54   6479.59    566.59 o
  10   2 -13   6555.85   4735.75    522.86 o
  10   2  14   1084.30    849.22    341.33 <
  10   2 -14    897.27    623.41    255.46 <
  10   2  15   6378.42   5681.91    555.45 o
  10   2 -15   6344.39   5238.90    440.65 o
  10   2  16    406.87    182.85    324.03 <
  10   2 -16    422.10    430.74    261.39 <
  10   3   0   9861.79  11377.30    783.50 o
  10   3   1   2425.99   2720.69    436.41 o
  10   3  -1   2198.16   2370.94    419.45 o
  10   3   2   1668.77   2002.78    400.87 o
  10   3  -2   1197.01    960.89    364.66 <
  10   3   3    138.16    251.57    295.73 <
  10   3  -3     62.41   -104.31    295.75 <
  10   3   4   5251.72   6861.25    579.48 o
  10   3  -4   4308.27   5387.39    561.94 o
  10   3   5   1363.93   1044.34    342.67 o
  10   3  -5   1239.28    343.61    314.65 <
  10   3   6  15014.70  15560.80    919.19 o
  10   3  -6  15358.60  15693.40    954.53 o
  10   3   7    279.27    -34.36    290.86 <
  10   3  -7    210.88    -99.40    287.17 <
  10   3   8    757.35    246.67    293.49 <
  10   3  -8   1036.37    818.54    343.77 <
  10   3   9    505.69   1275.06    330.71 o
  10   3  -9    525.90   1083.61    360.42 o
  10   3  10   6562.62   6662.44    571.56 o
  10   3 -10   6826.33   6987.65    620.48 o
  10   3  11    724.88    404.97    297.13 <
  10   3 -11    705.03    636.91    331.38 <
  10   3  12   9490.15  10701.10    995.60 o
  10   3 -12   8968.44   8040.58    674.35 o
  10   3  13    873.83   1218.60    362.97 o
  10   3 -13    682.00    751.04    341.12 <
  10   3  14    463.85    279.80    308.08 <
  10   3 -14    423.36    236.85    246.73 <
  10   3  15    102.44   -146.04    305.56 <
  10   3 -15    115.37     13.50    244.22 <
  10   3  16   4916.33   4150.37    519.61 o
  10   3 -16   4375.86   4144.24    404.39 o
  10   4   0    199.38    212.30    314.16 <
  10   4   1   2919.37   2613.93    438.61 o
  10   4  -1   3296.88   4550.44    496.70 o
  10   4   2   2559.25   2259.27    409.12 o
  10   4  -2   2162.35   1853.06    401.70 o
  10   4   3   9328.07   9615.07    702.15 o
  10   4  -3   8464.56   8519.19    703.01 o
  10   4   4   1550.24   2466.66    391.36 o
  10   4  -4   1612.34   1493.50    383.01 o
  10   4   5   1376.27   1302.05    351.05 o
  10   4  -5   1432.53    973.17    352.60 <
  10   4   6    680.57    860.26    321.41 <
  10   4  -6    552.37    376.75    320.36 <
  10   4   7   9282.95   9226.05    673.94 o
  10   4  -7   8911.67   8644.36    715.10 o
  10   4   8   1981.51   2557.47    391.78 o
  10   4  -8   2378.09   2207.72    418.72 o
  10   4   9  14350.80  13601.00    856.14 o
  10   4  -9  14734.30  14760.70    917.83 o
  10   4  10    394.11    514.20    290.79 <
  10   4 -10    319.94    143.58    328.92 <
  10   4  11    746.64   1039.43    455.13 <
  10   4 -11    633.33    659.00    337.46 <
  10   4  12    206.14    287.16    389.01 <
  10   4 -12    264.46    -42.95    310.50 <
  10   4  13   2949.56   2769.78    451.91 o
  10   4 -13   2750.37   2204.04    414.40 o
  10   4  14    731.54   1060.30    356.88 <
  10   4 -14    739.70   1368.32    293.87 o
  10   4  15   3366.80   2790.64    457.52 o
  10   4 -15   3022.75   3212.80    388.61 o
  10   4  16    391.08    438.11    589.04 <
  10   5   0   9437.33  10741.60    785.76 o
  10   5   1    629.92    519.10    336.30 <
  10   5  -1    825.89    844.31    354.65 <
  10   5   2   2321.40   2563.61    415.63 o
  10   5  -2   1914.08   1713.16    400.30 o
  10   5   3    140.25    218.44    306.79 <
  10   5  -3     84.88    214.76    336.23 <
  10   5   4   4257.29   3990.84    473.08 o
  10   5  -4   3825.51   4271.87    524.30 o
  10   5   5   4819.18   4524.67    475.69 o
  10   5  -5   4625.30   3965.07    513.18 o
  10   5   6   8764.60   8600.18    680.42 o
  10   5  -6   9218.16  11916.10    788.92 o
  10   5   7   1948.40   1950.01    359.57 o
  10   5  -7   1927.10   1870.25    411.18 o
  10   5   8   1764.84   1299.60    341.69 o
  10   5  -8   2185.80   1587.99    410.58 o
  10   5   9    440.51    564.51    417.20 <
  10   5  -9    446.57    536.28    346.03 <
  10   5  10   5254.32   5618.10    746.65 o
  10   5 -10   5910.21   6085.66    598.40 o
  10   5  11   2584.62   2715.78    559.43 o
  10   5 -11   2294.13   2272.77    425.87 o
  10   5  12   5677.35   4841.28    515.19 o
  10   5 -12   4898.93   3915.98    517.58 o
  10   5  13    498.33    101.86    316.69 <
  10   5 -13    661.79    109.22    272.60 <
  10   5  14     90.14    644.28    361.83 <
  10   5 -14     63.37    874.99    382.54 <
  10   5  15    121.52    -68.72    342.39 <
  10   5 -15    281.83   -362.02    337.40 <
  10   6   0     34.21    814.86    349.42 <
  10   6   1   2316.15   2278.90    430.80 o
  10   6  -1   2924.41   3162.48    463.46 o
  10   6   2   2823.60   3058.17    452.42 o
  10   6  -2   2721.23   2367.26    432.52 o
  10   6   3  10820.70  11989.70    803.00 o
  10   6  -3  10380.80  11665.70    832.33 o
  10   6   4   2003.19   2177.04    386.31 o
  10   6  -4   1854.13   2097.28    420.62 o
  10   6   5   1018.44    856.58    321.65 <
  10   6  -5    878.15    991.57    381.58 <
  10   6   6   1347.74   1522.95    349.55 o
  10   6  -6   1329.59   1406.37    393.86 o
  10   6   7   3299.14   3908.62    441.66 o
  10   6  -7   3148.04   2839.73    484.02 o
  10   6   8   4629.41   4454.72    475.37 o
  10   6  -8   4868.47   4562.71    550.47 o
  10   6   9   3494.38   3098.67    615.38 o
  10   6  -9   4413.44   3470.51    506.26 o
  10   6  10   2958.36   2444.57    538.18 o
  10   6 -10   2991.46   2253.13    439.23 o
  10   6  11    379.20    409.88    411.10 <
  10   6 -11    215.65     74.86    339.95 <
  10   6  12    570.13    780.50    370.51 <
  10   6 -12    569.69    336.25    341.24 <
  10   6  13   3527.29   3330.61    467.94 o
  10   6 -13   3267.28   2541.52    485.85 o
  10   6  14   1201.86    524.01    363.62 <
  10   6 -14   1174.34    748.59    404.00 <
  10   7   0   7643.68   7293.22    636.78 o
  10   7   1   2651.68   2879.00    453.69 o
  10   7  -1   3243.79   3617.77    482.79 o
  10   7   2   1909.30   1460.36    388.29 o
  10   7  -2   1788.36   1790.48    403.74 o
  10   7   3    106.55    -41.72    301.89 <
  10   7  -3     75.68    -83.45    325.20 <
  10   7   4   3158.70   3663.18    457.95 o
  10   7  -4   2849.36   2707.19    465.33 o
  10   7   5   4222.93   4465.76    487.84 o
  10   7  -5   4705.70   4314.82    546.95 o
  10   7   6   5135.94   5064.63    505.80 o
  10   7  -6   4879.51   4565.17    555.40 o
  10   7   7   2870.08   2688.78    404.08 o
  10   7  -7   2335.55   2229.81    457.88 o
  10   7   8    564.14   1293.46    469.58 <
  10   7  -8    872.49   1293.46    410.80 o
  10   7   9    446.67    207.40    417.29 <
  10   7  -9    545.78    589.05    371.82 <
  10   7  10   1725.20   2329.22    555.30 o
  10   7 -10   2175.68   2069.05    444.38 o
  10   7  11   3165.91   2692.47    456.08 o
  10   7 -11   3584.04   3630.04    514.11 o
  10   7  12   3794.76   3220.16    480.92 o
  10   7 -12   3548.20   3094.99    511.28 o
  10   7  13   1215.08   1160.93    392.75 <
  10   7 -13   1228.28    285.94    385.73 <
  10   8   0     37.69   -380.43    316.53 <
  10   8   1   1834.93   1797.84    418.52 o
  10   8  -1   1880.52   1908.29    423.35 o
  10   8   2   5919.24   6285.69    601.55 o
  10   8  -2   6722.29   6976.60    638.64 o
  10   8   3   6470.70   6116.34    571.68 o
  10   8  -3   5822.01   6108.98    623.91 o
  10   8   4   2736.91   2678.97    419.80 o
  10   8  -4   3103.46   3617.77    510.82 o
  10   8   5    618.63    603.78    314.17 <
  10   8  -5    621.76    562.05    375.55 <
  10   8   6    155.76    119.04    301.89 <
  10   8  -6    214.77    -94.49    357.12 <
  10   8   7   1212.69    933.90    497.17 <
  10   8  -7    825.61    542.42    379.33 <
  10   8   8   2854.44   2728.05    578.17 o
  10   8  -8   2516.07   2374.62    473.89 o
  10   8   9   2180.92   3345.33    614.56 o
  10   8  -9   2313.64   1662.85    449.88 o
  10   8  10   1203.36    932.67    394.12 <
  10   8 -10   1157.07    478.61    374.64 <
  10   8  11     34.44     93.27    342.38 <
  10   8 -11     44.73    365.70    400.01 <
  10   8  12    643.81    323.98    348.63 <
  10   8 -12    613.93    348.52    395.23 <
  10   9   0   3920.14   4247.32    525.78 o
  10   9   1   6371.73   6436.64    622.01 o
  10   9  -1   7520.55   8786.72    697.92 o
  10   9   2    618.19    627.10    349.75 <
  10   9  -2    526.51    829.58    387.64 <
  10   9   3     53.04    408.66    322.67 <
  10   9  -3     76.12   -401.29    342.30 <
  10   9   4   1571.40   1873.93    388.65 o
  10   9  -4   1378.19   1383.05    427.06 o
  10   9   5   3016.11   2898.63    643.19 o
  10   9  -5   3276.79   2116.91    471.66 o
  10   9   6   2720.72   2131.64    595.80 o
  10   9  -6   2877.61   2848.32    492.15 o
  10   9   7   1756.52   1614.99    542.54 <
  10   9  -7   1503.09   1327.82    446.84 <
  10   9   8    242.18   -109.22    458.97 <
  10   9  -8    184.88   -512.97    361.88 <
  10   9   9    408.94    460.20    360.78 <
  10   9  -9    389.72    944.94    434.17 <
  10   9  10   1408.25   1643.21    423.15 o
  10   9 -10   1553.02    995.26    431.15 <
  10  10   0    259.06    276.12    365.70 <
  10  10   1    909.11    849.22    378.01 <
  10  10  -1    859.17    892.17    387.77 <
  10  10   2   4551.96   4322.18    524.53 o
  10  10  -2   4799.07   4463.31    555.43 o
  10  10   3   1340.45   1414.96    396.31 o
  10  10  -3   1202.01   1298.37    431.90 o
  10  10   4   3336.07   3369.88    456.45 o
  10  10  -4   3560.53   3147.76    521.03 o
  10  10   5    244.64    142.35    483.52 <
  10  10  -5    245.86    537.51    403.66 <
  10  10   6    229.95    160.76    493.34 <
  10  10  -6    328.43    377.98    400.05 <
  10  10   7   1916.99   1891.11    602.57 o
  10  10  -7   2264.56   1259.10    461.13 <
  10  10   8   3180.30   2222.45    742.10 <
  10  10  -8   3110.87   2120.59    501.99 o
  10  11   0   1345.62    984.21    392.97 <
  10  11   1   3028.04   2415.12    446.43 o
  10  11  -1   3425.37   3441.05    514.17 o
  10  11   2    168.63    290.85    369.36 <
  10  11  -2    318.00    191.44    379.22 <
  10  11   3     24.53   -337.48    328.83 <
  10  11  -3     31.20    -96.95    375.52 <
  10  11   4    858.06    884.81    517.86 <
  10  11  -4    910.51   1023.48    430.68 <
  11   0   1   9896.26  10486.40    796.88 o
  11   0   2   1361.72   1827.29    419.21 o
  11   0   3    204.42   -123.95    330.11 <
  11   0   4   6627.31   6786.39    632.78 o
  11   0   5   6566.84   7144.73    634.00 o
  11   0   6     25.46    350.98    332.51 <
  11   0   7   1476.15    916.72    377.18 <
  11   0   8   4452.50   3944.20    494.46 o
  11   0   9    448.92    844.31    344.62 <
  11   0  10    228.99    300.66    323.96 <
  11   0  11   5433.09   4955.41    537.50 o
  11   0  12   1321.25    925.30    342.71 <
  11   0  13   1038.85   1198.97    352.07 o
  11   0  14   3516.64   2740.33    356.41 o
  11   1   0   1462.83   1556.08    406.11 o
  11   1   1   3562.37   4311.14    527.39 o
  11   1  -1   3499.03   3919.66    519.52 o
  11   1   2   7997.55   7046.55    669.16 o
  11   1  -2   8349.28   8430.83    702.92 o
  11   1   3    356.36    532.60    350.91 <
  11   1  -3    262.26    371.84    341.13 <
  11   1   4   4391.91   5195.94    557.71 o
  11   1  -4   5181.05   5204.53    586.54 o
  11   1   5   4460.65   4675.61    544.39 o
  11   1  -5   4575.61   6102.84    596.29 o
  11   1   6    857.98   1252.97    377.66 o
  11   1  -6    715.01   1299.60    384.89 o
  11   1   7   2700.67   2661.79    436.95 o
  11   1  -7   2756.74   3282.75    475.23 o
  11   1   8   4112.92   3951.57    502.27 o
  11   1  -8   3902.79   4117.24    514.97 o
  11   1   9    680.82    778.04    347.24 <
  11   1  -9    760.52    996.48    366.77 <
  11   1  10   2775.06   2024.87    406.10 o
  11   1 -10   3031.02   3146.53    455.08 o
  11   1  11   2686.66   2701.06    420.90 o
  11   1 -11   2286.48   2594.29    426.58 o
  11   1  12    634.26    530.15    326.48 <
  11   1 -12    543.86    385.34    332.63 <
  11   1  13    526.78    295.75    455.34 <
  11   1 -13    525.07    155.85    310.57 <
  11   1  14   5056.57   3988.38    515.37 o
  11   1 -14   4517.41   3830.08    395.81 o
  11   2   0    341.17    392.70    342.37 <
  11   2   1   9278.61  10189.40    761.40 o
  11   2  -1   7931.44   7984.13    716.53 o
  11   2   2   2327.39   2509.61    448.89 o
  11   2  -2   1954.71   1645.67    413.91 o
  11   2   3    487.47    655.32    353.36 <
  11   2  -3    486.43    288.39    362.07 <
  11   2   4   4364.07   4570.07    521.08 o
  11   2  -4   4213.61   4332.00    527.44 o
  11   2   5   7893.10   7808.64    678.90 o
  11   2  -5   7740.74   8840.71    723.07 o
  11   2   6    561.10    665.14    344.79 <
  11   2  -6    664.97    485.97    359.64 <
  11   2   7   2669.22   2428.62    424.99 o
  11   2  -7   3587.46   2966.13    463.79 o
  11   2   8   4597.89   4260.82    499.03 o
  11   2  -8   4846.57   4653.52    528.15 o
  11   2   9    666.37    290.85    320.43 <
  11   2  -9    464.15    446.70    338.71 <
  11   2  10   1172.58    825.90    327.93 <
  11   2 -10   1203.61   1099.57    369.47 <
  11   2  11   4854.02   4238.73    499.70 o
  11   2 -11   4680.76   4686.66    527.68 o
  11   2  12    582.84   -190.21    440.60 <
  11   2 -12    461.24    445.47    336.26 <
  11   2  13   2068.06   1884.97    548.73 o
  11   2 -13   1564.02    592.73    345.53 <
  11   2  14   1671.84   1799.07    597.54 o
  11   2 -14   1577.73   1945.10    559.28 o
  11   3   0   4135.48   4006.79    535.32 o
  11   3   1   1351.08   1919.33    421.53 o
  11   3  -1   1281.01   1579.40    405.91 o
  11   3   2   6984.90   7209.77    643.61 o
  11   3  -2   7104.77   6621.94    650.53 o
  11   3   3    605.11    239.30    346.17 <
  11   3  -3    496.70    -12.27    342.45 <
  11   3   4   4647.72   5564.10    559.76 o
  11   3  -4   4587.36   3963.84    546.15 o
  11   3   5   6175.41   6505.36    596.70 o
  11   3  -5   6227.83   6658.76    635.74 o
  11   3   6    821.18    543.65    335.17 <
  11   3  -6    436.74    311.71    348.56 <
  11   3   7   2291.00   2212.63    414.90 o
  11   3  -7   2196.31   2541.52    456.03 o
  11   3   8   7469.29   7176.64    636.58 o
  11   3  -8   7589.90   8041.81    684.61 o
  11   3   9   1811.84   1514.36    369.73 o
  11   3  -9   1819.06   1440.73    401.69 o
  11   3  10   2483.87   2033.46    388.47 o
  11   3 -10   2463.74   1994.19    427.69 o
  11   3  11   3122.42   3799.40    659.25 o
  11   3 -11   2850.83   3232.43    476.72 o
  11   3  12    957.71    644.28    459.11 <
  11   3 -12   1135.64    720.36    368.42 <
  11   3  13   1749.27   1580.63    403.93 o
  11   3 -13   1742.21   1282.42    388.25 o
  11   4   0    650.16    652.87    357.11 <
  11   4   1   4408.28   4212.96    528.12 o
  11   4  -1   4118.38   4511.17    548.95 o
  11   4   2   1817.25   1778.21    408.70 o
  11   4  -2   1564.81   1364.64    418.66 o
  11   4   3   1152.35    919.17    370.78 <
  11   4  -3   1141.08   1428.45    423.14 o
  11   4   4   2192.45   2046.96    412.54 o
  11   4  -4   2142.25   2356.21    440.27 o
  11   4   5   4643.24   4388.45    528.27 o
  11   4  -5   4011.03   4651.07    563.17 o
  11   4   6   2741.15   1943.88    403.68 o
  11   4  -6   2948.79   2920.72    467.61 o
  11   4   7   2738.25   2672.83    430.86 o
  11   4  -7   3370.41   3063.08    484.05 o
  11   4   8   5531.18   5515.01    544.92 o
  11   4  -8   5402.18   5237.67    584.54 o
  11   4   9   1326.09   1769.62    377.47 o
  11   4  -9   1186.93   1511.90    424.32 o
  11   4  10   3075.54   2891.27    435.99 o
  11   4 -10   2836.22   2417.57    457.14 o
  11   4  11   2440.51   2752.60    597.28 o
  11   4 -11   2911.47   2612.70    460.67 o
  11   4  12   1347.72    971.94    503.37 <
  11   4 -12   1030.26   1117.97    381.59 <
  11   4  13   1708.39    314.16    560.12 <
  11   5   0    492.65    924.08    382.65 <
  11   5   1   2594.94   2718.24    461.23 o
  11   5  -1   2091.58   2622.52    468.05 o
  11   5   2   4403.55   5610.74    570.17 o
  11   5  -2   3706.58   3706.13    551.01 o
  11   5   3    869.94    782.95    365.76 <
  11   5  -3    982.30   1151.11    391.35 <
  11   5   4   5373.57   5335.84    546.20 o
  11   5  -4   4243.14   4285.37    557.06 o
  11   5   5   2148.61   2148.82    420.93 o
  11   5  -5   2191.03   2378.30    447.67 o
  11   5   6    850.09    838.17    359.58 <
  11   5  -6    719.65    870.08    387.71 <
  11   5   7   2100.71   1913.20    413.80 o
  11   5  -7   2049.22   2455.62    460.88 o
  11   5   8   5165.93   4760.29    522.57 o
  11   5  -8   5882.74   4932.10    585.20 o
  11   5   9   1776.57   1352.37    371.07 o
  11   5  -9   1491.72   1158.47    406.48 <
  11   5  10   2001.15   2820.09    584.42 o
  11   5 -10   2078.04   1882.52    445.70 o
  11   5  11   2997.22   3275.38    645.14 o
  11   5 -11   3030.87   3106.03    491.98 o
  11   5  12   1984.72   1924.24    428.36 o
  11   5 -12   2237.73   2105.87    448.10 o
  11   6   0    775.36    798.90    382.87 <
  11   6   1   2706.30   3079.03    477.99 o
  11   6  -1   2720.53   3131.80    492.67 o
  11   6   2   3303.86   2762.42    474.59 o
  11   6  -2   3263.81   2913.36    481.65 o
  11   6   3    766.56    910.58    368.07 <
  11   6  -3    768.15    617.28    362.10 <
  11   6   4   1999.62   2420.03    427.69 o
  11   6  -4   2132.40   2329.22    462.40 o
  11   6   5   5179.21   5208.22    534.98 o
  11   6  -5   4403.18   3807.99    538.69 o
  11   6   6   2127.68   2129.18    402.52 o
  11   6  -6   1930.94   2164.77    452.55 o
  11   6   7   2920.89   2848.32    434.55 o
  11   6  -7   2905.27   2633.56    482.70 o
  11   6   8   1862.02   1805.20    380.50 o
  11   6  -8   1450.82   1605.17    440.42 o
  11   6   9   2250.38   1837.11    559.99 o
  11   6  -9   2492.32   2314.49    475.16 o
  11   6  10   1672.95   1681.26    544.87 o
  11   6 -10   1731.60   1468.95    429.77 o
  11   6  11   2869.65   2193.00    586.12 o
  11   6 -11   3407.55   3238.57    518.16 o
  11   7   0   1854.98   1741.39    439.46 o
  11   7   1   4118.87   4712.43    552.17 o
  11   7  -1   3734.83   3623.91    522.99 o
  11   7   2   2878.74   3209.11    473.12 o
  11   7  -2   2605.65   1981.92    446.29 o
  11   7   3   1677.43   1221.06    396.80 o
  11   7  -3   2026.21   2116.91    467.45 o
  11   7   4   3168.62   3531.87    485.29 o
  11   7  -4   2813.06   2837.27    496.98 o
  11   7   5   1108.79   1426.00    387.51 o
  11   7  -5    916.44    890.94    396.40 <
  11   7   6   1097.42   1083.61    362.03 <
  11   7  -6    952.24    508.06    402.71 <
  11   7   7    910.36    755.95    341.26 <
  11   7  -7   1051.13   1554.86    437.68 o
  11   7   8   2268.97   1888.65    573.46 o
  11   7  -8   2405.26   2937.90    520.81 o
  11   7   9   1916.82   2213.86    569.12 o
  11   7  -9   1669.12   1232.10    443.38 <
  11   8   0   4738.79   3877.94    535.62 o
  11   8   1   2800.19   3173.53    495.17 o
  11   8  -1   2601.22   2739.10    488.22 o
  11   8   2   3260.08   2697.37    472.16 o
  11   8  -2   3587.92   3671.77    528.77 o
  11   8   3   1701.65   2440.89    445.73 o
  11   8  -3   1847.11   1260.33    430.05 <
  11   8   4   1508.41   1401.46    384.22 o
  11   8  -4   1609.29   1453.00    437.02 o
  11   8   5   2142.96   2210.18    415.92 o
  11   8  -5   2058.56   1802.75    475.20 o
  11   8   6   2983.04   2710.87    431.22 o
  11   8  -6   2391.89   1808.89    471.90 o
  11   8   7   1177.14   1081.16    547.38 <
  11   8  -7   1223.49   1192.83    460.22 <
  11   9   0   2745.28   2253.13    467.01 o
  11   9   1   2163.54   1315.55    419.34 o
  11   9  -1   1918.97   1999.10    442.92 o
  11   9   2   1509.79   1624.81    413.45 o
  11   9  -2   1600.34   2035.92    453.58 o
  11   9   3   2396.74   2417.57    450.35 o
  11   9  -3   2662.74   2827.46    499.22 o
  11   9   4    928.69    622.19    380.59 <
  11   9  -4    889.47   1200.20    442.81 <
  12   0   0   7042.37   8074.94   1032.47 o
  12   0   1     16.84    -51.54    352.20 <
  12   0   2   2566.73   2091.14    464.49 o
  12   0   3    186.95   -269.98    353.39 <
  12   0   4   3553.41   2870.41    498.15 o
  12   0   5     13.58    757.18    381.39 <
  12   0   6  11242.20  11182.20    832.25 o
  12   0   7     55.87   -294.53    331.29 <
  12   0   8    193.73    -51.54    352.21 <
  12   0   9    432.00    -17.18    353.48 <
  12   0  10   3357.00   2845.86    475.79 o
  12   1   0      6.06    800.13    377.68 <
  12   1   1   1434.91   1402.68    424.64 o
  12   1  -1   1758.88   1797.84    449.11 o
  12   1   2    130.50   -346.07    349.68 <
  12   1  -2    132.26    195.12    366.92 <
  12   1   3  10465.70   9962.37    820.20 o
  12   1  -3  11632.00  11741.80    868.46 o
  12   1   4    479.93     95.72    362.09 <
  12   1  -4    341.36    -72.40    362.04 <
  12   1   5   1186.47    893.40    399.03 <
  12   1  -5   1429.31   1621.12    429.33 o
  12   1   6    310.12    525.24    366.86 <
  12   1  -6    310.42    115.36    365.73 <
  12   1   7   5962.84   6580.22    629.11 o
  12   1  -7   6017.58   5701.55    630.33 o
  12   1   8     34.77    149.72    342.38 <
  12   1  -8     49.49     30.68    338.71 <
  12   1   9   6135.23   5727.32    591.36 o
  12   1  -9   5945.27   5842.68    619.99 o
  12   1  10    202.71    -66.27    326.44 <
  12   1 -10    194.44    348.52    360.76 <
  12   2   0   7582.23   8166.98    724.79 o
  12   2   1    798.80    673.73    385.40 <
  12   2  -1    931.16    866.40    400.10 <
  12   2   2   3566.04   3767.49    539.60 o
  12   2  -2   3453.73   3558.87    528.73 o
  12   2   3    406.09    420.93    369.38 <
  12   2  -3    340.53    186.53    354.69 <
  12   2   4   3236.84   4111.10    532.16 o
  12   2  -4   3422.11   3426.33    528.91 o
  12   2   5    193.73    429.52    348.46 <
  12   2  -5    410.46   1202.65    411.86 <
  12   2   6  10649.20  10341.60    817.13 o
  12   2  -6  11769.50  11930.80    864.58 o
  12   2   7     87.51   -207.40    339.91 <
  12   2  -7     63.25   -160.76    350.96 <
  12   2   8    319.25     71.18    348.55 <
  12   2  -8    362.33    284.71    377.99 <
  12   2   9    106.59    179.17    338.70 <
  12   2  -9    179.16    699.50    365.50 <
  12   2  10   5362.41   5937.17    829.75 o
  12   2 -10   4882.61   6432.96    901.73 o
  12   3   0    816.70    787.86    400.08 <
  12   3   1   1466.02   1541.36    434.36 o
  12   3  -1   1966.44   1980.69    458.95 o
  12   3   2   1632.58   1068.89    401.76 <
  12   3  -2   1583.45   1584.31    423.38 o
  12   3   3   7896.46   8121.58    735.66 o
  12   3  -3   8722.62   9176.96    766.80 o
  12   3   4     70.00    310.48    349.71 <
  12   3  -4    223.50    -33.13    363.26 <
  12   3   5   1812.61   1737.71    432.05 o
  12   3  -5   2075.13   1915.65    453.02 o
  12   3   6     47.33   -134.99    341.15 <
  12   3  -6     83.43     18.41    362.02 <
  12   3   7   5838.46   5332.16    574.40 o
  12   3  -7   5750.30   5016.77    583.46 o
  12   3   8    417.62    593.96    350.91 <
  12   3  -8    390.40    391.48    362.02 <
  12   3   9   6396.89   5119.86    566.62 o
  12   3  -9   5969.47   5045.00    601.07 o
  12   4   0   6465.81   7417.17    704.31 o
  12   4   1   1274.51   1765.93    437.63 o
  12   4  -1   1030.49   1238.24    422.00 <
  12   4   2   1628.04   1380.59    426.06 o
  12   4  -2   1527.56   1234.56    421.17 <
  12   4   3    571.58    384.11    371.90 <
  12   4  -3    498.99   -184.08    371.86 <
  12   4   4   1756.14   1283.65    409.10 o
  12   4  -4   1779.42   1773.30    467.57 o
  12   4   5    593.34    406.20    368.22 <
  12   4  -5    833.43    454.06    378.13 <
  12   4   6   8164.22   7211.00    680.23 o
  12   4  -6   8162.08   8884.89    758.67 o
  12   4   7    678.65    585.37    370.65 <
  12   4  -7    800.19    655.32    403.81 <
  12   4   8    658.90    468.79    371.91 <
  12   4  -8    636.26    206.17    392.80 <
  12   5   0    133.38    353.43    393.89 <
  12   5   1   1642.97   2049.42    454.83 o
  12   5  -1   1290.93   1032.07    419.89 <
  12   5   2   1757.95   1306.96    422.57 o
  12   5  -2   1753.76   1857.97    458.86 o
  12   5   3   5301.43   5427.88    585.06 o
  12   5  -3   5214.91   4937.01    621.56 o
  12   5   4   1093.20    787.86    389.21 <
  12   5  -4    991.69   1045.57    423.35 <
  12   5   5    755.75   1119.20    380.18 <
  12   5  -5    589.21    393.93    382.95 <
  12   5   6     64.27   -111.68    327.65 <
  12   5  -6     51.39   -165.67    371.83 <
  12   5   7   2214.24   1774.52    416.56 o
  12   5  -7   2576.37   2553.79    497.05 o
  12   6   0   6186.59   5650.01    624.75 o
  12   6   1    902.40   1140.06    419.54 <
  12   6  -1   1010.67   1203.88    433.06 <
  12   6   2   1197.17    771.91    412.59 <
  12   6  -2   1207.28    709.32    408.94 <
  12   6   3    135.83   -425.84    341.05 <
  12   6  -3    126.25    240.53    379.19 <
  12   6   4   2250.47   2027.33    442.07 o
  12   6  -4   1984.82   1845.70    472.62 o
  12   6   5   1573.66   1654.26    424.53 o
  12   6  -5   1576.95   1999.10    473.26 o
  13   0   1   2344.06   3220.16    543.62 o
  13   0   2   3993.96   3761.35    578.42 o
  13   1   0    281.10     88.36    380.45 <
  13   1   1   2248.48   1638.31    459.62 o
  13   1  -1   2255.68   1730.34    490.20 o
  13   1   2   3512.29   3215.25    549.03 o
  13   1  -2   4154.00   4112.33    581.77 o

loop_
 _twin_refln_datum_id
 _twin_refln_individual_id
 _twin_refln_index_h
 _twin_refln_index_k
 _twin_refln_index_l
 _twin_refln_F_squared_calc
 _twin_refln_F_squared_meas
 _twin_refln_F_squared_sigma
 _twin_refln_include_status
 ? ? ? ? ? ? ? ? ?
